# Supplementary material for: The Effect of Cannabidiol on UV-Induced Changes in Intracellular Signaling of 3D-Cultured Skin Keratinocytes
Source: MDPI journal article supplement (doi:10.3390/ijms22031501), 2021-02-02
Supplement: s1 [file s1]

Supplementary table S1. The names and abundance of proteins identified in the keratinocytes cultured in a three-dimensional culture model and treated with cannabidiol (CBD, 4  $\mu$ M) following UVA (30 J/cm<sup>2</sup>) or UVB (60 mJ/cm<sup>2</sup>) (B) radiation.

**Data analyzed using Metaboanalyst with R version 3.6.2. Abbreviations: Ctr, control; CBD, cannabidiol, b.t., below threshold.**

| ID         | Protein                                                        | Ctr1     | Ctr2     | Ctr3     | UVA1     | UVA2     | UVA3     | UVB1     | UVB2     | UVB3     | CB01     | CB02     | CB03     | UVA + CB01 | UVA + CB02 | UVA + CB03 | UVB + CB01 | UVB + CB02 | UVB + CB03 |
|------------|----------------------------------------------------------------|----------|----------|----------|----------|----------|----------|----------|----------|----------|----------|----------|----------|------------|------------|------------|------------|------------|------------|
| A0A024Q2N4 | Vinculin                                                       | b.t.     | b.t.     | b.t.     | 4,30E+06 | 4,30E+06 | 5,59E+06 | b.t.     | b.t.     | b.t.     | 1,40E+06 | 2,10E+06 | 1,40E+06 | 8,46E+06   | 9,40E+06   | 8,93E+06   | 3,90E+06   | 1,00E+07   | 6,70E+06   |
| A0A024Q2N9 | Voltage-dependent anion channel 2                              | b.t.     | b.t.     | b.t.     | b.t.     | b.t.     | b.t.     | 7,05E+05 | 5,88E+05 | 4,70E+05 | b.t.     | b.t.     | b.t.     | 6,93E+06   | 7,70E+06   | 7,32E+06   | 1,50E+07   | 1,35E+07   | 1,08E+07   |
| A0A024QZZ7 | Histone H2B                                                    | b.t.     | 2,80E+06 | 4,20E+06 | 2,80E+06 | 1,08E+07   | 1,20E+07   | 1,14E+07   | b.t.       | b.t.       | b.t.       |
| A0A024R172 | B4 12-hydroxydehydrogenase                                     | 6,60E+05 | 9,90E+05 | 6,60E+05 | 8,28E+06 | 7,59E+06 | 6,90E+06 | 3,90E+06 | 3,25E+06 | 2,60E+06 | 8,60E+06 | 1,29E+07 | 8,60E+06 | 1,98E+07   | 2,20E+07   | 2,09E+07   | 1,80E+07   | 1,62E+07   | 1,20E+06   |
| A0A024R1A3 | Ubiquitin-activating enzyme E1                                 | 2,10E+06 | 1,30E+06 | 2,90E+06 | 1,67E+07 | 1,80E+07 | 1,10E+07 | 4,50E+06 | 3,75E+06 | 3,00E+06 | 6,50E+06 | 5,60E+06 | 6,30E+06 | 4,86E+07   | 5,40E+07   | 5,13E+07   | 2,30E+07   | 4,00E+07   | 3,00E+07   |
| A0A024R1K7 | Tyrosine 3-monooxygenase/tryptophan 5-monooxygenase activation | b.t.     | b.t.     | b.t.     | 3,09E+06 | 4,90E+06 | 9,20E+05 | b.t.     | b.t.     | b.t.     | 6,50E+06 | 9,75E+06 | 6,50E+06 | b.t.       | b.t.       | b.t.       | 1,10E+07   | 9,90E+06   | 1,10E+06   |
| A0A024R1X4 | X-ray repair complementing defective                           | b.t.     | b.t.     | b.t.     | 7,78E+06 | 7,80E+06 | 4,90E+06 | 2,10E+06 | 1,75E+06 | 1,40E+06 | 1,20E+06 | 9,90E+05 | 1,40E+06 | 1,62E+07   | 1,80E+07   | 1,71E+07   | 2,60E+07   | 1,10E+07   | 1,80E+07   |
| A0A024R231 | Guanine deaminase                                              | 2,00E+06 | 2,00E+06 | 3,00E+06 | 1,42E+07 | 2,20E+07 | 4,60E+06 | 5,25E+06 | 4,38E+06 | 3,50E+06 | 2,40E+06 | 3,50E+06 | 1,70E+06 | 4,32E+07   | 4,80E+07   | 4,56E+07   | 2,40E+07   | 4,20E+07   | 3,40E+07   |
| A0A024R2G7 | 0                                                              | b.t.     | 3,00E+06 | 4,50E+06 | 3,00E+06 | 5,67E+06   | 6,30E+06   | 5,99E+06   | 2,30E+06   | 2,07E+06   | 1,66E+06   |
| A0A024R2P0 | 40S ribosomal protein S1                                       | b.t.     | b.t.     | b.t.     | 7,34E+06 | 6,70E+06 | 5,70E+06 | 4,35E+06 | 3,63E+06 | 2,90E+06 | 6,70E+06 | 7,80E+06 | 7,20E+06 | 4,86E+07   | 5,40E+07   | 5,13E+07   | 3,00E+07   | 2,70E+07   | 3,80E+07   |
| A0A024R2Q4 | Ribosomal protein L15                                          | b.t.     | b.t.     | b.t.     | 1,13E+06 | 1,03E+06 | 9,40E+05 | b.t.     | b.t.     | b.t.     | 3,80E+06 | 5,70E+06 | 3,80E+06 | 1,62E+06   | 1,80E+06   | 1,71E+06   | 8,20E+06   | 7,38E+06   | 5,90E+06   |
| A0A024R3W7 | Eukaryotic translation elongation factor 1 beta 2              | b.t.     | 2,60E+05 | 2,60E+05 | 3,90E+05 | b.t.       | b.t.       | b.t.       | 9,50E+06   | 8,55E+06   | 6,84E+06   |
| A0A024R454 | Carbamoyl-phosphate synthetase 1                               | 3,35E+06 | 5,00E+06 | 1,70E+06 | 4,64E+07 | 5,50E+07 | 2,70E+07 | 1,92E+06 | 8,40E+05 | 1,50E+06 | 5,00E+06 | 4,40E+06 | 1,90E+07 | 7,38E+07   | 8,20E+07   | 7,79E+07   | 2,70E+07   | 2,10E+07   | 4,90E+07   |
| A0A024R408 | Ribosomal protein S5                                           | b.t.     | 3,06E+06   | 3,40E+06   | 3,23E+06   | 1,60E+07   | 1,44E+07   | 1,15E+07   |
| A0A024R4U3 | Tubulin tyrosine ligase-like family, member 12                 | b.t.     | b.t.     | b.t.     | 2,30E+06 | 2,30E+06 | 2,99E+06 | b.t.       | b.t.       | b.t.       | 4,32E+06   | 3,89E+06   | 3,60E+06   |
| A0A024R5Z8 | RAB11A, member RAS oncogene family                             | b.t.     | b.t.     | b.t.     | 9,72E+06 | 8,91E+06 | 8,10E+06 | b.t.       | b.t.       | b.t.       | 2,40E+05   | 2,40E+05   | 1,92E+05   |
| A0A024R652 | Methylenetetrahydrofolate dehydrogenase (NADP+ dependent) 1    | b.t.     | b.t.     | b.t.     | 2,52E+06 | 2,31E+06 | 2,10E+06 | b.t.     | b.t.     | b.t.     | 1,36E+06 | 7,10E+05 | 2,00E+06 | 1,17E+07   | 1,30E+07   | 1,24E+07   | 1,10E+07   | 1,10E+07   | 1,00E+07   |
| A0A024R6C9 | Dihydrolipoamide S-succinyltransferase                         | b.t.     | 1,60E+06 | 2,40E+06 | 1,60E+06 | 7,74E+06   | 8,60E+06   | 8,17E+06   | 9,60E+06   | 8,64E+06   | 6,91E+06   |
| A0A024R6S1 | DnaJ (Hsp40) homolog                                           | b.t.     | 1,89E+06   | 2,10E+06   | 2,00E+06   | b.t.       | b.t.       | b.t.       |
| A0A024R718 | Pre-B-cell colony enhancing factor 1                           | 1,10E+06 | 1,65E+06 | 1,10E+06 | 1,40E+06 | 2,90E+07 | 1,70E+07 | 6,05E+06 | 1,50E+06 | 5,30E+06 | 1,30E+07 | 2,00E+07 | 5,30E+07 | 1,80E+08   | 2,00E+08   | 1,90E+08   | 6,30E+07   | 8,50E+07   | 1,30E+08   |
| A0A024R773 | Heterogeneous nuclear ribonucleoprotein F                      | b.t.     | b.t.     | b.t.     | 6,84E+06 | 6,27E+06 | 5,70E+06 | 1,50E+06 | 1,25E+06 | 1,00E+06 | 1,30E+07 | 1,95E+07 | 1,30E+07 | 9,00E+06   | 1,00E+07   | 9,50E+06   | b.t.       | b.t.       | b.t.       |
| A0A024R814 | Ribosomal protein L7                                           | b.t.     | b.t.     | b.t.     | 4,32E+06 | 3,96E+06 | 3,60E+06 | 2,20E+06 | 1,20E+06 | 1,60E+06 | 7,30E+06 | 1,10E+07 | 7,30E+06 | 1,53E+07   | 1,70E+07   | 1,62E+07   | 2,20E+07   | 1,98E+07   | 1,58E+07   |
| A0A024R872 | Chromosome 9 open reading frame 88                             | b.t.     | b.t.     | b.t.     | 2,65E+06 | 3,20E+06 | 1,50E+06 | b.t.     | b.t.     | b.t.     | 1,70E+06 | 1,50E+06 | 1,90E+06 | 7,47E+06   | 8,30E+06   | 7,69E+06   | 4,20E+06   | 3,78E+06   | 3,60E+06   |
| A0A024R895 | SET translocation                                              | b.t.     | b.t.     | b.t.     | 7,32E+06 | 6,71E+06 | 6,10E+06 | 9,45E+05 | 7,88E+05 | 6,30E+05 | b.t.     | b.t.     | b.t.     | 1,17E+07   | 1,30E+07   | 1,24E+07   | 1,20E+07   | 1,08E+07   | 8,64E+06   |
| A0A024R8W0 | DEAD (Asp-Glu-Ala-Asp) box polypeptide 48                      | b.t.     | b.t.     | b.t.     | 5,20E+06 | 5,20E+06 | 6,76E+06 | b.t.     | b.t.     | b.t.     | b.t.     | b.t.     | b.t.     | 5,13E+06   | 5,70E+06   | 5,42E+06   | 6,90E+06   | 1,10E+07   | 5,50E+06   |
| A0A024R9E2 | Poly(A) binding protein, cytoplasmic 1                         | b.t.     | 2,30E+06 | 2,30E+06 | 3,45E+06 | 1,44E+07   | 1,60E+07   | 1,52E+07   | 5,90E+06   | 7,70E+06   | 1,50E+07   |
| A0A024RAE4 | Cell division cycle 42                                         | b.t.     | b.t.     | b.t.     | 8,76E+06 | 8,03E+06 | 7,30E+06 | 2,85E+06 | 2,38E+06 | 1,90E+06 | b.t.     | b.t.     | b.t.     | b.t.       | b.t.       | b.t.       | b.t.       | b.t.       | b.t.       |
| A0A024RAH8 | DEAD (Asp-Glu-Ala-Asp) box polypeptide 18                      | b.t.     | b.t.     | b.t.     | 9,12E+05 | 8,36E+05 | 7,60E+05 | b.t.       | b.t.       | b.t.       | 2,00E+06   | 1,80E+06   | 1,44E+06   |
| A0A024RAM0 | Transportin 1                                                  | 3,00E+06 | 3,00E+06 | 4,50E+06 | 4,68E+06 | 4,29E+06 | 3,90E+06 | b.t.     | b.t.     | b.t.     | 4,90E+06 | 7,35E+06 | 4,90E+06 | 1,80E+07   | 2,00E+07   | 1,90E+07   | 8,10E+06   | 7,29E+06   | 1,20E+07   |
| A0A024RAM2 | Glutaredoxin (Thioltransferase)                                | b.t.     | b.t.     | b.t.     | 3,48E+06 | 3,19E+06 | 2,90E+06 | 6,00E+06 | 5,00E+06 | 4,00E+06 | 8,30E+06 | 8,30E+06 | 1,25E+07 | 8,91E+06   | 9,90E+06   | 9,41E+06   | 2,10E+07   | 1,89E+07   | 1,51E+07   |
| A0A024RB41 | HCG2016482                                                     | b.t.     | 1,17E+07   | 1,30E+07   | 1,24E+07   | 3,40E+06   | 3,06E+06   | 2,45E+06   |
| A0A024RB85 | Proliferation-associated 2G4                                   | b.t.     | 1,50E+06 | 1,50E+06 | 2,25E+06 | 1,17E+07   | 1,30E+07   | 1,24E+07   | 1,00E+07   | 9,00E+06   | 1,10E+07   |
| A0A024RB87 | RAP1B                                                          | b.t.     | 5,67E+06   | 6,30E+06   | 5,99E+06   | 3,00E+06   | 2,70E+06   | 2,16E+06   |
| A0A024RB99 | Serine hydroxymethyltransferase                                | b.t.     | b.t.     | b.t.     | 2,88E+06 | 2,64E+06 | 2,40E+06 | 1,98E+06 | 9,60E+05 | 1,50E+06 | 2,75E+06 | 1,40E+06 | 4,10E+06 | 2,16E+07   | 2,40E+07   | 2,28E+07   | 1,30E+07   | 4,10E+06   | 1,40E+07   |
| A0A024RBH2 | Cytoskeleton-associated protein 4                              | b.t.     | 2,88E+06   | 3,20E+06   | 3,04E+06   | 4,40E+06   | 3,96E+06   | 1,00E+07   |
| A0A024RBS1 | GCN1 general control of amino-acid synthesis 1                 | b.t.       | b.t.       | b.t.       | 2,90E+06   | 2,61E+06   | 2,09E+06   |
| A0A024RC46 | HCG2020860                                                     | 2,10E+06 | 2,10E+06 | 3,15E+06 | 7,80E+06 | 7,80E+06 | 1,01E+07 | 4,20E+06 | 3,50E+06 | 2,80E+06 | 1,40E+07 | 2,10E+07 | 1,40E+07 | 5,40E+07   | 6,00E+07   | 5,70E+07   | 2,60E+07   | 1,20E+06   | 1,10E+06   |
| A0A024RC87 | Ribonuclease/angiogenesis inhibitor 1                          | b.t.     | b.t.     | b.t.     | 5,40E+06 | 4,95E+06 | 4,50E+06 | b.t.     | b.t.     | b.t.     | 1,50E+06 | 1,50E+06 | 2,25E+06 | 6,93E+06   | 7,70E+06   | 7,32E+06   | 3,40E+06   | 3,06E+06   | 1,10E+07   |
| A0A024RCN6 | Valyl-tRNA synthetase                                          | b.t.     | b.t.     | b.t.     | 3,91E+06 | 3,90E+06 | 2,80E+06 | b.t.       | b.t.       | b.t.       | 4,20E+06   | 6,90E+06   | 2,30E+06   |
| A0A024RD93 | Phosphoribosylaminoimidazole carboxylase                       | b.t.     | b.t.     | b.t.     | b.t.     | b.t.     | b.t.     | 1,50E+06 | 1,25E+06 | 1,00E+06 | 4,80E+05 | 4,80E+05 | 7,20E+05 | 6,84E+06   | 7,60E+06   | 7,22E+06   | 2,70E+06   | 2,43E+06   | 7,90E+06   |
| A0A024RDF4 | Heterogeneous nuclear ribonucleoprotein D                      | b.t.     | b.t.     | b.t.     | 6,96E+06 | 6,38E+06 | 5,80E+06 | 5,10E+06 | 4,25E+06 | 3,40E+06 | 3,45E+06 | 1,90E+06 | 5,00E+06 | 2,79E+07   | 3,10E+07   | 2,95E+07   | 1,70E+07   | 1,53E+07   | 1,80E+06   |
| A0A024RDQ0 | Heat shock 105kDa/110kDa protein 1                             | b.t.     | b.t.     | b.t.     | 6,10E+06 | 6,10E+06 | 7,93E+06 | b.t.     | b.t.     | b.t.     | 1,30E+06 | 1,30E+06 | 1,95E+06 | b.t.       | b.t.       | b.t.       | 4,40E+06   | 3,96E+06   | 6,00E+06   |
| A0A024RDS1 | Heat shock 105kDa/110kDa protein 2                             | b.t.     | b.t.     | b.t.     | 6,10E+06 | 6,10E+06 | 7,93E+06 | b.t.     | b.t.     | b.t.     | 1,30E+06 | 1,30E+06 | 1,95E+06 | b.t.       | b.t.       | b.t.       | 4,40E+06   | 3,96E+06   | 6,00E+06   |
| A0A024RDY0 | RAN binding protein 5                                          | b.t.     | b.t.     | b.t.     | 6,54E+06 | 9,30E+06 | 2,70E+06 | b.t.     | b.t.     | b.t.     | b.t.     | b.t.     | b.t.     | 1,26E+07   | 1,40E+07   | 1,33E+07   | 3,87E+06   | 2,00E+06   | 4,10E+06   |
| A0A075B716 | 40S ribosomal protein S17                                      | b.t.     | 7,38E+06   | 8,20E+06   | 7,79E+06   | 1,30E+07   | 1,17E+07   | 9,36E+06   |
| A0A087W2V1 | Heterogeneous nuclear ribonucleoprotein A/B                    | 2,90E+06 | 2,90E+06 | 4,35E+06 | 7,16E+06 | 6,20E+06 | 5,80E+06 | 5,10E+06 | 4,25E+06 | 3,40E+06 | 1,80E+06 | 2,70E+06 | 1,80E+06 | 2,34E+07   | 2,60E+07   | 2,47E+07   | 1,80E+07   | 1,62E+07   | 2,90E+06   |
| A0A087X1N8 | Serin B6                                                       | b.t.     | b.t.     | b.t.     | b.t.     | b.t.     | b.t.     | 8,70E+05 | 7,25E+05 | 5,80E+05 | b.t.     | b.t.     | b.t.     | 4,50E+06   | 5,00E+06   | 4,75E+06   | 2,30E+06   | 2,07E+06   | 3,20E+06   |
| A0A087X123 | Proteasome activator complex subunit 2                         | b.t.     | b.t.     | b.t.     | 6,84E+05 | 6,27E+05 | 5,70E+05 | b.t.     | b.t.     | b.t.     | 2,60E+06 | 1,70E+06 | 3,50E+06 | 5,22E+06   | 5,80E+06   | 5,51E+06   | 9,30E+06   | 8,37E+06   | 6,70E+06   |
| A0A087X2D0 | Serine/arginine-rich-splicing factor 3                         | b.t.     | 1,62E+07   | 1,80E+07   | 1,71E+07   | 3,90E+07   | 3,51E+07   | 2,81E+07   |
| A0A090N8G0 | Glycyl-tRNA synthetase                                         | 1,50E+06 | 2,25E+06 | 1,50E+06 | 6,09E+06 | 9,80E+06 | 1,70E+06 | 3,30E+06 | 2,75E+06 | 2,20E+06 | 3,15E+06 | 1,90E+06 | 4,40E+06 | 1,35E+07   | 1,50E+07   | 1,43E+07   | 9,40E+06   | 1,10E+07   | 1,50E+07   |
| A0A0A0MR02 | Voltage-dependent anion-selective channel protein 2            | b.t.     | b.t.     | b.t.     | b.t.     | b.t.     | b.t.     | 7,05E+05 | 5,88E+05 | 4,70E+05 | b.t.     | b.t.     | b.t.     | 6,93E+06   | 7,70E+06   | 7,32E+06   | 1,50E+07   | 1,35E+07   | 1,08E+07   |
| A0A0A0MS58 | Aldo-keto reductase family 1 member C3                         | b.t.     | b.t.     | b.t.     | 6,22E+06 | 7,07E+06 | 4,10E+06 | 2,25E+06 | 1,30E+06 | 1,60E+06 | 1,79E+06 | 4,80E+05 | 3,10E+06 | 2,70E+07   | 3,00E+07   | 2,85E+07   | 1,60E+07   | 1,44E+07   | 1,50E+06   |
| A0A0C4DQ55 | Calpain small subunit 1                                        | b.t.     | b.t.     | b.t.     | 1,13E+06 | 1,03E+06 | 9,40E+05 | b.t.     | b.t.     | b.t.     | b.t.     | b.t.     | b.t.     | 1,35E+07   | 1,50E+07   | 1,43E+07   | 4,60E+06   | 4,14E+06   | 3,31E+06   |
| A0A0D9SEM4 | Serine/arginine-rich-splicing factor 4a                        | b.t.     | 1,08E+07   | 1,20E+07   | 1,14E+07   | 5,40E+06   | 4,86E+06   | 3,89E+06   |
| A0A0D9SF53 | ATP-dependent RNA helicase DDX3X                               | b.t.     | b.t.     | b.t.     | 3,96E+06 | 3,63E+06 | 3,30E+06 | b.t.     | b.t.     | b.t.     | 1,40E+06 | 1,40E+06 | 2,10E+06 | 1,71E+07   | 1,90E+07   | 1,81E+07   | 2,90E+06   | 2,61E+06   | 1,30E+05   |
| A0A0K0K1K7 | 6-phosphogluconolactonase                                      | b.t.     | 1,44E+07   | 1,60E+07   | 1,52E+07   | 8,50E+06   | 7,65E+06   | 6,12E+06   |
| A0A0M4FEM1 | Alpha-1,4 glucan phosphorylase                                 | b.t.     | 5,10E+06 | 1,40E+06 | 1,40E+06 | b.t.       | b.t.       | b.t.       | 3,30E+06   | 2,97E+06   | 2,38E+06   |
| A0A0M      |                                                                |          |          |          |          |          |          |          |          |          |          |          |          |            |            |            |            |            |            |

|            |                                                                        |          |          |          |          |          |          |          |          |          |          |          |          |          |          |          |          |          |          |          |
|------------|------------------------------------------------------------------------|----------|----------|----------|----------|----------|----------|----------|----------|----------|----------|----------|----------|----------|----------|----------|----------|----------|----------|----------|
| AOA0S2Z4G4 | Tropomyosin 3 isoform 1                                                | b.t.     | 1,35E+06 | 5,90E+05 | 2,10E+06 | 9,00E+06 | 1,00E+07 | 9,50E+06 | 1,60E+07 | 1,44E+07 | 1,15E+07 |
| AOA0S2Z4I4 | Tropomyosin 3 isoform 3                                                | b.t.     | 1,35E+06 | 5,90E+05 | 2,10E+06 | 9,00E+06 | 1,00E+07 | 9,50E+06 | 1,60E+07 | 1,44E+07 | 1,15E+07 |
| AOA0S2Z4J1 | Hydroxysteroid (17-beta) dehydrogenase 4                               | b.t.     | b.t.     | b.t.     | 4,20E+06 | 4,20E+06 | 5,46E+06 | b.t.     | 8,46E+06 | 9,40E+06 | 8,93E+06 | 1,60E+06 | 1,44E+06 | 1,15E+06 |
| A0JLQ5     | BXDC2 protein                                                          | b.t.     | b.t.     | b.t.     | 1,20E+06 | 1,20E+06 | 1,56E+06 | b.t.     | 6,66E+06 | 7,40E+06 | 7,03E+06 | 7,20E+06 | 6,48E+06 | 5,18E+06 |
| A0PJ87     | RSL1D1 protein                                                         | b.t.     | b.t.     | b.t.     | 2,26E+06 | 1,30E+06 | 2,30E+06 | 2,40E+06 | 2,00E+06 | 1,60E+06 | b.t.     | b.t.     | b.t.     | b.t.     | 7,56E+06 | 8,40E+06 | 7,98E+06 | 4,10E+06 | 3,69E+06 | 4,00E+05 |
| A3R0T7     | Histone H1e                                                            | b.t.     | 1,40E+07 | 2,10E+07 | 1,40E+07 | 3,33E+07 | 3,70E+07 | 3,52E+07 | 3,10E+07 | 2,79E+07 | 2,23E+07 |          |
| A3R0T8     | Histone 1                                                              | b.t.     | 1,40E+07 | 2,10E+07 | 1,40E+07 | 3,33E+07 | 3,70E+07 | 3,52E+07 | 3,10E+07 | 2,79E+07 | 2,23E+07 |          |
| A4D1M6     | HCG19809                                                               | b.t.     | 2,60E+05 | 2,60E+05 | 3,90E+05 | b.t.     | b.t.     | b.t.     | 9,50E+06 | 8,55E+06 | 6,84E+06 |          |
| A4D2P2     | Ras-related C3 botulinum toxin substrate 1                             | b.t.     | 5,60E+06 | 8,40E+06 | 5,60E+06 | 8,19E+06 | 9,10E+06 | 8,65E+06 | 9,10E+06 | 8,19E+06 | 6,55E+06 |          |
| A4FU77     | SNRNP200 protein                                                       | 9,90E+04 | 1,49E+05 | 9,90E+04 | 3,48E+06 | 4,30E+06 | 1,90E+06 | b.t.     | 1,30E+06 | 1,17E+06 | 9,36E+05 |
| A6NJA2     | Ubiquitin carboxyl-terminal hydrolase 14                               | b.t.     | 5,40E+06 | 6,00E+06 | 5,70E+06 | 2,10E+06 | 1,89E+06 | 4,10E+06 |
| A6NLN1     | Polyypyrimidine tract binding protein 1                                | 2,40E+06 | 2,40E+06 | 3,60E+06 | 1,05E+07 | 1,40E+07 | 5,00E+06 | 3,95E+06 | 1,10E+06 | 3,40E+06 | 6,05E+06 | 5,60E+06 | 6,50E+06 | 3,96E+07 | 4,40E+07 | 4,18E+07 | 1,60E+07 | 3,10E+06 | 2,30E+06 |          |
| A8K401     | Prohibitin                                                             | b.t.     | b.t.     | b.t.     | 1,35E+06 | 4,50E+05 | 1,60E+06 | 1,07E+06 | 8,88E+05 | 7,10E+05 | 3,70E+06 | 5,55E+06 | 3,70E+06 | 1,44E+07 | 1,60E+07 | 1,52E+07 | 1,60E+07 | 1,44E+07 | 1,15E+07 |          |
| A8K4Z4     | 60S acidic ribosomal protein P0                                        | b.t.     | b.t.     | b.t.     | 1,19E+07 | 1,09E+07 | 9,90E+06 | 3,23E+06 | 6,60E+05 | 2,90E+06 | 3,20E+06 | 4,80E+06 | 3,20E+06 | 3,15E+07 | 3,50E+07 | 3,33E+07 | 1,00E+07 | 1,40E+06 | 5,40E+05 |          |
| A8K644     | Splicing factor, arginine/serine-rich 4                                | b.t.     | 1,08E+07 | 1,20E+07 | 1,14E+07 | 5,40E+06 | 4,86E+06 | 3,89E+06 |
| A8K8N7     | Phosphoribosylformylglycinamidine synthase 1                           | b.t.     | b.t.     | b.t.     | 3,11E+06 | 3,00E+06 | 2,30E+06 | b.t.     | b.t.     | b.t.     | 2,20E+06 | 3,30E+06 | 2,20E+06 | 7,92E+06 | 8,80E+06 | 8,36E+06 | 4,30E+06 | 3,87E+06 | 6,50E+06 |          |
| A8MT02     | Small nuclear ribonucleoprotein-associated proteins B                  | b.t.     | b.t.     | b.t.     | 6,60E+06 | 6,05E+06 | 5,50E+06 | b.t.     | b.t.     | b.t.     | 7,90E+06 | 1,19E+07 | 7,90E+06 | 1,35E+07 | 1,50E+07 | 1,43E+07 | 2,50E+07 | 1,20E+06 | 1,20E+06 |          |
| B0LPF3     | Growth factor receptor-bound protein 2                                 | b.t.     | 9,90E+06 | 1,10E+07 | 1,05E+07 | b.t.     | b.t.     | b.t.     |
| B0ZBD0     | 40S ribosomal protein S19                                              | b.t.     | 1,17E+07 | 1,30E+07 | 1,24E+07 | 1,20E+07 | 1,08E+07 | 8,64E+06 |
| B1AH77     | Ras-related C3 botulinum toxin substrate 2                             | b.t.     | 5,60E+06 | 8,40E+06 | 5,60E+06 | 8,19E+06 | 9,10E+06 | 8,65E+06 | 9,10E+06 | 8,19E+06 | 6,55E+06 |          |
| B2R4C0     | 60S ribosomal protein L18a                                             | b.t.     | 5,90E+06 | 8,85E+06 | 5,90E+06 | 4,41E+06 | 4,90E+06 | 4,66E+06 | 8,30E+06 | 7,47E+06 | 5,98E+06 |          |
| B2R4D8     | 60S ribosomal protein L27                                              | b.t.     | b.t.     | b.t.     | 1,56E+06 | 1,43E+06 | 1,30E+06 | b.t.     | b.t.     | b.t.     | 9,30E+06 | 1,40E+07 | 9,30E+06 | 1,80E+07 | 2,00E+07 | 1,90E+07 | 1,20E+07 | 1,08E+07 | 8,64E+06 |          |
| B2R4R0     | Histone H4                                                             | 1,47E+06 | 2,00E+06 | 9,40E+05 | 4,60E+06 | 4,90E+07 | 3,50E+07 | 5,15E+07 | 1,70E+07 | 4,30E+07 | 8,60E+06 | 1,80E+06 | 8,80E+07 | 4,86E+08 | 5,40E+08 | 5,13E+08 | 6,70E+08 | 4,50E+07 | 6,80E+06 |          |
| B2R5W3     | Poly [ADP-ribose] polymerase 3                                         | b.t.     | b.t.     | b.t.     | 3,36E+06 | 3,08E+06 | 2,80E+06 | b.t.     | 6,03E+06 | 6,70E+06 | 6,37E+06 | 4,10E+06 | 3,69E+06 | 5,10E+06 |
| B2R6F3     | Splicing factor arginine/serine-rich 3                                 | b.t.     | 1,62E+07 | 1,80E+07 | 1,71E+07 | 3,90E+07 | 3,51E+07 | 2,81E+07 |
| B2RU06     | EIF4G1 protein                                                         | b.t.     | b.t.     | b.t.     | 2,42E+06 | 2,60E+06 | 1,60E+06 | b.t.     | b.t.     | b.t.     | 1,11E+06 | 3,30E+05 | 1,90E+06 | 7,74E+06 | 8,60E+06 | 8,17E+06 | 2,20E+06 | 1,98E+06 | 1,58E+06 |          |
| B3GQ57     | 60 kDa heat shock protein, mitochondrial                               | b.t.     | b.t.     | b.t.     | 1,80E+06 | 1,65E+06 | 1,50E+06 | 1,65E+06 | 1,38E+06 | 1,10E+06 | 1,70E+07 | 1,30E+07 | 2,10E+07 | 8,64E+07 | 9,60E+07 | 9,12E+07 | 2,00E+08 | 7,30E+06 | 9,60E+06 |          |
| B3KM80     | Nucleolin 1                                                            | 1,70E+06 | 1,70E+06 | 2,55E+06 | 1,13E+07 | 5,70E+06 | 1,20E+07 | 7,65E+06 | 6,38E+06 | 5,10E+06 | 1,90E+06 | 6,40E+06 | 1,90E+07 | 6,93E+07 | 7,70E+07 | 7,32E+07 | 4,10E+07 | 2,40E+07 | 1,30E+07 |          |
| B3KS31     | Tubulin                                                                | b.t.     | 1,08E+07 | 1,20E+07 | 1,14E+07 | 2,30E+06 | 2,07E+06 | 1,66E+06 |
| B4DG62     | Hexokinase                                                             | b.t.     | b.t.     | b.t.     | 2,50E+06 | 2,50E+06 | 3,25E+06 | b.t.     | 7,40E+05 | 4,80E+06 | 3,84E+06 |
| B4DHO3     | Phosphoserine aminotransferase                                         | b.t.     | b.t.     | b.t.     | 3,12E+06 | 2,86E+06 | 2,60E+06 | b.t.     | b.t.     | b.t.     | 1,30E+06 | 1,30E+06 | 1,95E+06 | 7,20E+06 | 8,00E+06 | 7,60E+06 | 6,80E+06 | 1,70E+07 | 8,90E+06 |          |
| B4DI38     | Adenylyl cyclase-associated protein                                    | b.t.     | b.t.     | b.t.     | 5,40E+06 | 5,40E+06 | 7,02E+06 | b.t.     | 9,90E+06 | 1,10E+07 | 1,05E+07 | 7,10E+06 | 6,39E+06 | 5,11E+06 |
| B4DJV2     | Citrate synthase, cytoplasmic                                          | b.t.     | b.t.     | b.t.     | 7,22E+06 | 8,70E+06 | 4,10E+06 | 1,50E+06 | 1,25E+06 | 1,00E+06 | 2,30E+06 | 2,90E+06 | 4,05E+06 | 1,08E+07 | 1,20E+07 | 1,14E+07 | 1,70E+07 | 1,20E+07 | 2,40E+07 |          |
| B4DMH3     | Coronin-1A                                                             | b.t.     | 5,30E+05 | 5,30E+05 | 7,95E+05 | b.t.     | b.t.     | b.t.     | 7,97E+06 | 5,30E+06 | 7,60E+06 |          |
| B4DUC8     | 5-methyl-5'-thioadenosine phosphorylase                                | b.t.     | b.t.     | b.t.     | 8,50E+05 | 8,50E+05 | 1,11E+06 | b.t.     |
| B4DV00     | Protein arginine N-methyltransferase 5                                 | b.t.     | b.t.     | b.t.     | 2,00E+06 | 2,00E+06 | 2,60E+06 | b.t.     | 8,22E+06 | 5,80E+06 | 7,60E+06 |
| B4DWC4     | Chloride intracellular channel protein                                 | b.t.     | 1,17E+06 | 1,30E+06 | 1,24E+06 | b.t.     | b.t.     | b.t.     |
| B4DXW1     | Actin-related protein 3                                                | 1,00E+06 | 1,00E+06 | 1,50E+06 | 3,24E+06 | 2,97E+06 | 2,70E+06 | b.t.     | b.t.     | b.t.     | 3,85E+06 | 1,10E+06 | 6,60E+06 | 1,44E+07 | 1,60E+07 | 1,52E+07 | 6,10E+06 | 5,49E+06 | 2,90E+06 |          |
| B4DY09     | Interleukin enhancer-binding factor 2                                  | 5,50E+05 | 8,25E+05 | 5,50E+05 | 7,45E+06 | 3,00E+06 | 8,50E+06 | 5,40E+06 | 4,50E+06 | 3,60E+06 | 3,30E+06 | 1,90E+06 | 2,80E+06 | 1,62E+07 | 1,80E+07 | 1,71E+07 | 1,30E+07 | 2,70E+07 | 1,30E+07 |          |
| B4DZ08     | Aconitate hydratase, mitochondrial                                     | b.t.     | 5,04E+06 | 5,60E+06 | 5,32E+06 | 2,10E+06 | 1,89E+06 | 1,51E+06 |
| B4E0E1     | Poly [ADP-ribose] polymerase 2                                         | b.t.     | b.t.     | b.t.     | 3,36E+06 | 3,08E+06 | 2,80E+06 | b.t.     | 6,03E+06 | 6,70E+06 | 6,37E+06 | 4,10E+06 | 3,69E+06 | 5,10E+06 |
| B5BU25     | U2 small nuclear RNA auxiliary factor 2                                | 5,20E+06 | 5,20E+06 | 7,80E+06 | 2,16E+06 | 1,98E+06 | 1,80E+06 | b.t.     | 6,75E+06 | 7,50E+06 | 7,13E+06 | 1,90E+07 | 1,71E+07 | 2,20E+06 |
| B5BU85     | Autoantigen La                                                         | b.t.     | b.t.     | b.t.     | 6,05E+06 | 3,70E+06 | 6,00E+06 | 2,85E+06 | 2,38E+06 | 1,90E+06 | 7,40E+05 | 7,40E+05 | 1,11E+06 | 7,02E+06 | 7,80E+06 | 7,41E+06 | 9,30E+06 | 8,37E+06 | 1,10E+06 |          |
| B5BU6E     | ATP-dependent RNA helicase DDX5                                        | b.t.     | 6,03E+06 | 6,70E+06 | 6,37E+06 | 3,70E+06 | 3,33E+06 | 2,66E+06 |
| B5MCX3     | Septin-2                                                               | b.t.     | b.t.     | b.t.     | 3,72E+06 | 3,41E+06 | 3,10E+06 | b.t.     | b.t.     | b.t.     | 5,30E+06 | 7,95E+06 | 5,30E+06 | 7,02E+06 | 7,80E+06 | 7,41E+06 | b.t.     | b.t.     | b.t.     |          |
| B5MDF5     | GTP-binding nuclear protein Ran                                        | 2,80E+06 | 4,20E+06 | 2,80E+06 | 1,03E+07 | 7,90E+06 | 9,00E+06 | 3,30E+06 | 2,75E+06 | 2,20E+06 | 2,80E+07 | 4,20E+07 | 2,80E+07 | 4,77E+07 | 5,30E+07 | 5,04E+07 | 2,90E+07 | 2,61E+07 | 1,80E+06 |          |
| B7Z4E3     | 60S ribosomal protein L31                                              | b.t.     | 7,30E+06 | 1,10E+07 | 7,30E+06 | 9,90E+06 | 1,10E+07 | 1,05E+07 | 5,00E+06 | 9,60E+05 | 7,68E+05 |          |
| B8ZWD1     | Acyl-CoA-binding protein                                               | b.t.     | 1,20E+07 | 1,08E+07 | 8,64E+06 |
| B9EKV4     | Aldehyde dehydrogenase 9 family, member A1                             | b.t.     | b.t.     | b.t.     | b.t.     | b.t.     | b.t.     | 1,17E+06 | 9,75E+05 | 7,80E+05 | 4,40E+05 | 4,40E+05 | 6,60E+05 | b.t.     | b.t.     | b.t.     | 3,20E+06 | 8,30E+06 | 6,64E+06 |          |
| B9VP24     | 60 kDa chaperonin                                                      | b.t.     | 6,60E+05 | 6,60E+05 | 9,90E+05 | b.t.     | b.t.     | b.t.     | b.t.     | b.t.     | b.t.     |          |
| C9J8H1     | V-type proton ATPase subunit E 1                                       | b.t.     | 6,57E+06 | 7,30E+06 | 6,94E+06 | b.t.     | b.t.     | b.t.     |
| C9JX88     | 60S ribosomal protein L24                                              | b.t.     | 8,10E+06 | 9,00E+06 | 8,55E+06 | b.t.     | b.t.     | b.t.     |
| D3DP78     | Aspartyl-tRNA synthetase                                               | b.t.     | 8,91E+06 | 9,90E+06 | 9,41E+06 | 3,90E+06 | 3,51E+06 | 1,10E+07 |
| D3DUG9     | Ubiquitin specific peptidase 14                                        | b.t.     | 5,40E+06 | 6,00E+06 | 5,70E+06 | 2,10E+06 | 1,89E+06 | 4,10E+06 |
| D3DWK1     | Eukaryotic translation elongation factor 1                             | b.t.     | 2,09E+06 | 2,80E+05 | 3,90E+06 | b.t.     | b.t.     | b.t.     | 6,10E+06 | 5,49E+06 | 1,30E+06 |          |
| D6RAN4     | 60S ribosomal protein L9                                               | b.t.     | 7,50E+06 | 1,13E+07 | 7,50E+06 | 1,62E+07 | 1,80E+07 | 1,71E+07 | 1,50E+07 | 1,35E+07 | 1,20E+06 |          |
| D6REX3     | Protein transport protein Sec31A                                       | b.t.     | 8,40E+06 | 7,56E+06 | 6,05E+06 |
| E1NZ2A1    | Peroxisome proliferator activated receptor interacting complex protein | b.t.     | 2,90E+06 | 2,61E+06 | 2,09E+06 |
| E1PS52     | RNA-binding region (RNP1. RRM) containing 2                            | b.t.     | 6,50E+06 | 5,85E+06 | 4,68E+06 |
| E4W6B6     | RPL27/NME2 fusion protein                                              | b.t.     | b.t.     | b.t.     | 1,56E+06 | 1,43E+06 | 1,30E+06 | b.t.     | b.t.     | b.t.     | 9,30E+06 | 1,40E+07 | 9,30E+06 | 1,80E+07 | 2,00E+07 | 1,90E+07 | 1,20E+07 | 1,08E+07 | 8,64E+06 |          |
| E5RK69     | Annexin A2                                                             | b.t.     | b.t.     | b.t.     | 3,80E+06 | 3,80E+06 | 4,94E+06 | b.t.     | 1,30E+06 | 1,17E+06 | 3,50E+06 |
| E7ENZ3     | T-complex protein 1                                                    | b.t.     | b.t.     |          |          |          |          |          |          |          |          |          |          |          |          |          |          |          |          |          |

|        |                                                               |          |          |          |          |          |          |          |          |          |          |          |          |          |          |          |          |          |          |          |          |
|--------|---------------------------------------------------------------|----------|----------|----------|----------|----------|----------|----------|----------|----------|----------|----------|----------|----------|----------|----------|----------|----------|----------|----------|----------|
| E9PCR7 | 2-oxoglutarate dehydrogenase, mitochondrial                   | b.t.     | 3,33E+06 | 3,70E+06 | 3,52E+06 | 1,10E+06 | 4,90E+06 | 3,92E+06 |          |
| E9PEB5 | Far upstream element-binding protein 1                        | b.t.     | 1,70E+07 | 1,53E+07 | 1,22E+07 |          |
| E9PEX6 | Dihydropolpyl dehydrogenase, cytoplasmic                      | b.t.     | 4,40E+06 | 3,96E+06 | 4,30E+06 |          |
| E9PGT1 | Translin                                                      | b.t.     | b.t.     | b.t.     | 1,68E+06 | 1,54E+06 | 1,40E+06 | b.t.     | 7,74E+06 | 8,60E+06 | 8,17E+06 | b.t.     | b.t.     | b.t.     |          |
| E9PKD5 | 26S protease regulatory subunit 6A                            | b.t.     | 1,10E+06 | 1,10E+06 | 1,65E+06 | 6,21E+06 | 6,90E+06 | 6,56E+06 | 3,00E+06 | 8,10E+06 | 2,80E+06 |
| E9PNQ6 | Thioredoxin reductase 1                                       | 1,70E+06 | 1,70E+06 | 2,55E+06 | 3,20E+07 | 5,30E+07 | 7,80E+06 | 1,65E+06 | 1,38E+06 | 1,10E+06 | 2,60E+06 | 1,10E+06 | 3,70E+06 | 8,00E+06 | 7,29E+07 | 8,10E+07 | 7,70E+07 | 2,60E+07 | 3,00E+07 | 4,40E+07 |          |
| E9PP21 | Cysteine and glycine-rich protein 1                           | b.t.     | 5,40E+06 | 6,00E+06 | 5,70E+06 | b.t.     | b.t.     | b.t.     |          |
| E9PP73 | Coatomer subunit beta                                         | b.t.     | b.t.     | b.t.     | 3,22E+06 | 4,90E+06 | 1,10E+06 | b.t.     | 7,02E+06 | 7,80E+06 | 7,41E+06 | 5,99E+06 | 2,60E+06 | 6,70E+06 |          |
| F4ZW62 | NF45                                                          | 5,50E+05 | 8,25E+05 | 5,50E+05 | 7,45E+06 | 3,00E+06 | 8,50E+06 | 5,40E+06 | 4,50E+06 | 3,60E+06 | 3,30E+06 | 1,90E+06 | 2,80E+06 | 1,62E+07 | 1,80E+07 | 1,71E+07 | 1,30E+07 | 2,70E+07 | 1,30E+07 |          |          |
| F4ZW64 | NF90a                                                         | b.t.     | b.t.     | b.t.     | 1,32E+06 | 1,21E+06 | 1,10E+06 | b.t.     | b.t.     | b.t.     | 6,80E+05 | 6,80E+05 | 1,02E+06 | 1,08E+07 | 1,20E+07 | 1,14E+07 | 6,40E+06 | 7,40E+06 | 6,30E+06 |          |          |
| F4ZW65 | NF90b                                                         | b.t.     | b.t.     | b.t.     | 1,32E+06 | 1,21E+06 | 1,10E+06 | b.t.     | b.t.     | b.t.     | 6,80E+05 | 6,80E+05 | 1,02E+06 | 1,08E+07 | 1,20E+07 | 1,14E+07 | 6,40E+06 | 7,40E+06 | 6,30E+06 |          |          |
| F4ZW66 | NF110b                                                        | b.t.     | b.t.     | b.t.     | 1,32E+06 | 1,21E+06 | 1,10E+06 | b.t.     | b.t.     | b.t.     | 6,80E+05 | 6,80E+05 | 1,02E+06 | 1,08E+07 | 1,20E+07 | 1,14E+07 | 6,40E+06 | 7,40E+06 | 6,30E+06 |          |          |
| F5H2F4 | C-1-tetrahydrofolate synthase                                 | b.t.     | b.t.     | b.t.     | 2,52E+06 | 2,31E+06 | 2,10E+06 | b.t.     | b.t.     | b.t.     | 1,36E+06 | 7,10E+05 | 2,00E+06 | 1,17E+07 | 1,30E+07 | 1,24E+07 | 1,10E+07 | 1,10E+07 | 1,00E+07 |          |          |
| F5H365 | Protein transport protein Sec23A                              | b.t.     | b.t.     | b.t.     | 8,28E+05 | 6,90E+05 | 6,90E+05 | b.t.     | 9,90E+06 | 1,10E+07 | 1,05E+07 | 4,00E+06 | 3,60E+06 | 9,40E+06 |          |
| F6KPG5 | Albumin                                                       | 3,50E+05 | 5,25E+05 | 3,50E+05 | 1,20E+07 | 4,30E+07 | 3,10E+07 | 5,00E+04 | 1,28E+06 | 2,50E+06 | 1,10E+07 | 7,00E+06 | 2,40E+07 | 1,71E+08 | 1,90E+08 | 1,81E+08 | 8,60E+07 | 8,10E+07 | 1,60E+08 |          |          |
| F6U211 | 40S ribosomal protein S10                                     | b.t.     | b.t.     | b.t.     | 9,48E+06 | 8,69E+06 | 7,90E+06 | 8,25E+06 | 6,88E+06 | 5,50E+06 | 1,20E+06 | 1,80E+06 | 2,40E+06 | 4,50E+06 | 5,00E+06 | 4,75E+06 | 7,90E+07 | 7,11E+07 | 5,69E+07 |          |          |
| F8VRV5 | Dynein light chain 1                                          | b.t.     | 1,40E+07 | 1,26E+07 | 1,01E+07 |          |          |
| F8VZX2 | Poly(rC)-binding protein 2c                                   | b.t.     | b.t.     | b.t.     | b.t.     | b.t.     | b.t.     | 2,10E+06 | 1,75E+06 | 1,40E+06 | 3,90E+05 | 3,90E+05 | 5,85E+05 | 6,48E+06 | 7,20E+06 | 6,84E+06 | 1,10E+06 | 1,10E+06 | 8,80E+05 |          |          |
| F8W1A4 | Adenylylate kinase 2                                          | b.t.     | b.t.     | b.t.     | 2,64E+06 | 2,42E+06 | 2,20E+06 | b.t.     | 4,50E+06 | 5,00E+06 | 4,75E+06 | 3,72E+05 | 3,35E+05 | 3,10E+05 |          |
| F8W6I7 | Heterogeneous nuclear ribonucleoprotein A1                    | 2,10E+06 | 2,10E+06 | 3,15E+06 | 7,80E+06 | 7,80E+06 | 1,01E+07 | 4,20E+06 | 3,50E+06 | 2,80E+06 | 1,40E+07 | 2,10E+07 | 1,40E+07 | 5,40E+07 | 6,00E+07 | 5,70E+07 | 2,60E+07 | 1,20E+06 | 1,10E+06 |          |          |
| F8W727 | 60S ribosomal protein L32                                     | b.t.     | 3,00E+06 | 4,50E+06 | 3,00E+06 | 5,67E+06 | 6,30E+06 | 5,99E+06 | 2,30E+06 | 2,07E+06 | 1,66E+06 |          |          |
| G3V1A4 | Cofilin 1                                                     | 5,20E+06 | 6,60E+06 | 3,80E+06 | 2,00E+07 | 1,90E+07 | 1,50E+07 | 7,95E+06 | 6,63E+06 | 5,30E+06 | 1,70E+06 | 1,80E+06 | 5,40E+06 | 8,82E+07 | 9,80E+07 | 9,31E+07 | 8,80E+07 | 7,92E+07 | 2,00E+06 |          |          |
| G3V1B3 | 60S ribosomal protein L21                                     | b.t.     | 3,70E+06 | 5,55E+06 | 3,70E+06 | b.t.     | b.t.     | b.t.     | b.t.     | b.t.     | b.t.     |          |          |
| G3V1C3 | Apoptosis inhibitor 5                                         | b.t.     | b.t.     | b.t.     | 1,58E+06 | 1,80E+06 | 9,70E+05 | b.t.     | b.t.     | b.t.     | 2,60E+06 | 3,90E+06 | 2,60E+06 | 4,77E+06 | 5,30E+06 | 5,04E+06 | 3,00E+06 | 2,70E+06 | 3,00E+06 |          |          |
| G3V4W0 | Heterogeneous nuclear ribonucleoproteins C1/C2                | b.t.     | b.t.     | b.t.     | 2,28E+06 | 2,09E+06 | 1,90E+06 | 5,00E+06 | 3,40E+06 | 3,30E+06 | 2,60E+06 | 2,60E+06 | 2,60E+06 | 5,85E+07 | 6,50E+07 | 6,18E+07 | 6,10E+07 | 5,49E+07 | 4,39E+07 |          |          |
| G8JLB6 | Heterogeneous nuclear ribonucleoprotein H                     | b.t.     | b.t.     | b.t.     | 9,24E+06 | 8,47E+06 | 7,70E+06 | 6,45E+06 | 5,38E+06 | 4,30E+06 | 4,28E+06 | 3,50E+05 | 8,20E+06 | 1,17E+07 | 1,30E+07 | 1,24E+07 | 2,50E+07 | 2,25E+07 | 1,80E+07 |          |          |
| HOY8C6 | Importin-5                                                    | b.t.     | b.t.     | b.t.     | 6,54E+06 | 9,30E+06 | 2,70E+06 | b.t.     | b.t.     | b.t.     | b.t.     | b.t.     | b.t.     | 1,26E+07 | 1,40E+07 | 1,33E+07 | 3,87E+06 | 2,00E+06 | 4,10E+06 |          |          |
| HOYA96 | Heterogeneous nuclear ribonucleoprotein D0                    | b.t.     | b.t.     | b.t.     | 6,96E+06 | 6,38E+06 | 5,80E+06 | 5,10E+06 | 4,25E+06 | 3,40E+06 | 3,45E+06 | 1,90E+06 | 5,00E+06 | 2,79E+07 | 3,10E+07 | 2,95E+07 | 1,70E+07 | 1,53E+07 | 1,80E+06 |          |          |
| HOYAS8 | Clusterin                                                     | b.t.     | b.t.     | b.t.     | 2,70E+06 | 2,60E+06 | 2,00E+06 | b.t.     | b.t.     | b.t.     | 1,40E+06 | 3,10E+06 | 4,70E+06 | 1,98E+07 | 2,20E+07 | 2,09E+07 | 5,90E+06 | 1,10E+07 | 5,70E+06 |          |          |
| HOYJC0 | 26S protease regulatory subunit 10B                           | b.t.     | b.t.     | b.t.     | 1,68E+06 | 1,54E+06 | 1,40E+06 | b.t.     | b.t.     | b.t.     | b.t.     | b.t.     | b.t.     | 4,50E+06 | 5,00E+06 | 4,75E+06 | 1,30E+06 | 1,17E+06 | 9,36E+05 |          |          |
| HOYJG7 | Activator of 90 kDa heat shock protein ATPase homolog 1       | b.t.     | b.t.     | b.t.     | 3,96E+06 | 3,63E+06 | 3,30E+06 | 4,50E+06 | 3,75E+06 | 3,00E+06 | b.t.     | b.t.     | b.t.     | 4,41E+07 | 4,90E+07 | 4,66E+07 | 4,70E+06 | 4,23E+06 | 3,38E+06 |          |          |
| HOYKK0 | Small nuclear ribonucleoprotein polypeptide A                 | b.t.     | b.t.     | b.t.     | 4,56E+06 | 4,18E+06 | 3,80E+06 | b.t.     | b.t.     | b.t.     | b.t.     | b.t.     | b.t.     | 2,52E+06 | 2,80E+06 | 2,66E+06 | b.t.     | b.t.     | b.t.     |          |          |
| HOYN26 | Acidic leucine-rich nuclear phosphoprotein 32 family member A | b.t.     | b.t.     | b.t.     | 6,72E+06 | 6,16E+06 | 5,60E+06 | 2,85E+06 | 2,38E+06 | 1,90E+06 | 4,10E+06 | 6,15E+06 | 4,10E+06 | 5,00E+06 | 4,75E+06 | 2,50E+07 | 2,25E+07 | 1,80E+07 |          |          |          |
| H3BM89 | 60S ribosomal protein L4                                      | b.t.     | 4,59E+07 | 5,10E+07 | 4,85E+07 | 4,90E+07 | 4,41E+07 | 3,53E+07 |          |          |
| H3BN19 | Casein kinase II                                              | b.t.     | b.t.     | b.t.     | 9,48E+05 | 8,69E+05 | 7,90E+05 | b.t.     | b.t.     | b.t.     | 2,30E+06 | 3,45E+06 | 2,30E+06 | 4,41E+06 | 4,90E+06 | 4,66E+06 | b.t.     | b.t.     | b.t.     |          |          |
| H3BRU6 | Poly(rC)-binding protein 2a                                   | b.t.     | b.t.     | b.t.     | b.t.     | b.t.     | b.t.     | 2,10E+06 | 1,75E+06 | 1,40E+06 | 3,90E+05 | 3,90E+05 | 5,85E+05 | 6,48E+06 | 7,20E+06 | 6,84E+06 | 1,10E+06 | 1,10E+06 | 8,80E+05 |          |          |
| H3BSC1 | Ras-related protein Rab-11A                                   | b.t.     | b.t.     | b.t.     | 9,72E+06 | 8,91E+06 | 8,10E+06 | b.t.     | 2,40E+05 | 2,40E+05 | 1,92E+05 |          |          |
| H6VRG2 | Keratin 1                                                     | 6,25E+06 | 1,00E+07 | 2,50E+06 | 4,40E+06 | 8,20E+07 | 2,60E+07 | 2,70E+06 | 1,20E+06 | 2,10E+06 | 5,90E+06 | 6,00E+06 | 1,10E+07 | 1,44E+08 | 1,60E+08 | 1,52E+08 | 2,30E+07 | 2,80E+07 | 5,50E+07 |          |          |
| H9ZYJ2 | Thioredoxin                                                   | b.t.     | b.t.     | b.t.     | 1,56E+07 | 1,43E+07 | 1,30E+07 | 1,10E+06 | 1,10E+06 | 1,32E+06 | 1,70E+06 | 7,50E+05 | 1,60E+06 | 4,77E+07 | 5,30E+07 | 5,04E+07 | 6,50E+07 | 5,85E+07 | 4,68E+07 |          |          |
| I3LOA0 | HCG2044781                                                    | b.t.     | 1,10E+07 | 1,65E+07 | 1,10E+07 | 1,80E+07 | 2,00E+07 | 1,90E+07 | 5,80E+06 | 5,22E+06 | 4,18E+06 |          |          |
| I3L397 | Eukaryotic translation initiation factor 5A                   | 1,70E+06 | 1,70E+06 | 2,55E+06 | 4,24E+06 | 1,20E+06 | 5,20E+06 | 5,55E+06 | 4,63E+06 | 3,70E+06 | 2,16E+06 | 4,20E+05 | 3,90E+06 | 3,33E+07 | 3,70E+07 | 3,52E+07 | 2,70E+07 | 2,43E+07 | 2,30E+06 |          |          |
| I6L965 | KRT18 protein                                                 | b.t.     | b.t.     | b.t.     | 3,14E+06 | 3,20E+06 | 2,20E+06 | b.t.     | b.t.     | b.t.     | 1,90E+06 | 2,70E+06 | 1,50E+06 | 8,01E+06 | 8,90E+06 | 8,46E+06 | 1,00E+07 | 1,70E+07 | 1,30E+07 |          |          |
| J3K000 | PEPD protein                                                  | b.t.     | b.t.     | b.t.     | 3,50E+06 | 3,50E+06 | 4,55E+06 | b.t.     | 2,10E+06 | 2,70E+06 | 4,40E+06 |          |          |
| J3KN67 | Tropomyosin alpha-3                                           | b.t.     | 5,90E+05 | 5,90E+05 | 8,85E+05 | 9,00E+06 | 1,00E+07 | 9,50E+06 | 6,80E+06 | 6,12E+06 | 4,90E+06 |          |          |
| J3KNE3 | Platelet-activating factor acetylhydrolase IB subunit beta    | b.t.     | b.t.     | b.t.     | 6,36E+06 | 5,83E+06 | 5,30E+06 | b.t.     | b.t.     | b.t.     | b.t.     | b.t.     | b.t.     | 5,67E+06 | 6,30E+06 | 5,99E+06 | 2,20E+07 | 1,98E+07 | 1,58E+07 |          |          |
| J3KQ18 | D-dopachrome decarboxylase                                    | b.t.     | b.t.     | b.t.     | 7,20E+06 | 6,60E+06 | 6,00E+06 | 3,00E+06 | 2,50E+06 | 2,00E+06 | 1,70E+06 | 2,55E+06 | 1,70E+06 | b.t.     | b.t.     | b.t.     | 3,50E+06 | 3,15E+06 | 2,52E+06 |          |          |
| J3KQ32 | Obg-like ATPase 1a                                            | 6,90E+05 | 1,04E+06 | 6,90E+05 | 7,63E+06 | 7,70E+06 | 5,40E+06 | b.t.     | b.t.     | b.t.     | 1,70E+06 | 1,70E+06 | 2,55E+06 | 1,80E+07 | 2,00E+07 | 1,90E+07 | 5,80E+06 | 5,80E+06 | 7,60E+06 |          |          |
| J3QQV1 | 60S ribosomal protein L26                                     | b.t.     | 3,80E+06 | 5,70E+06 | 3,80E+06 | b.t.     | b.t.     | b.t.     | 7,60E+06 | 6,84E+06 | 5,47E+06 |          |          |
| J3QQX2 | Rho GDP-dissociation inhibitor 1                              | b.t.     | b.t.     | b.t.     | 2,16E+06 | 1,98E+06 | 1,80E+06 | 3,75E+06 | 3,13E+06 | 2,50E+06 | 7,00E+06 | 1,05E+07 | 7,00E+06 | 9,90E+06 | 1,10E+07 | 1,05E+07 | 1,30E+07 | 1,17E+07 | 1,70E+06 |          |          |
| J3QR09 | Ribosomal protein L19                                         | b.t.     | 7,11E+06 | 7,90E+06 | 7,51E+06 | 4,90E+06 | 4,41E+06 | 3,53E+06 |          |          |
| J3QS39 | Polyubiquitin-B                                               | 1,23E+06 | 7,60E+05 | 1,70E+06 | 2,80E+06 | 6,60E+06 | 2,80E+07 | 1,10E+07 | 9,13E+06 | 7,30E+06 | 3,00E+06 | 2,60E+06 | 5,90E+07 | 1,08E+08 | 1,20E+08 | 1,14E+08 | 1,30E+08 | 4,20E+07 | 1,80E+07 |          |          |
| K7ELC2 | 40S ribosomal protein S15                                     | b.t.     | 1,20E+06 | 1,80E+06 | 1,20E+06 | 6,12E+06 | 6,80E+06 | 6,46E+06 | 9,10E+06 | 8,19E+06 | 4,00E+05 |          |          |
| K7ENG2 | Splicing factor U2AF 65 kDa subunit                           | 5,20E+06 | 5,20E+06 | 7,80E+06 | 2,16E+06 | 1,98E+06 | 1,80E+06 | b.t.     | b.t.     | b.t.     | b.t.     | b.t.     | b.t.     | 6,75E+06 | 7,50E+06 | 7,13E+06 | 1,90E+07 | 1,71E+07 | 2,20E+06 |          |          |
| K7ER00 | Phenylalanine-tRNA ligase alpha subunit                       | b.t.     | b.t.     | b.t.     | b.t.     | b.t.     | b.t.     | 2,10E+06 | 1,75E+06 | 1,40E+06 | b.t.     | b.t.     | b.t.     | 5,49E+06 | 6,10E+06 | 5,80E+06 | 3,90E+06 | 3,51E+06 | 2,81E+06 |          |          |
| K7ERE3 | Keratin, type I cytoskeletal 13                               | b.t.     | b.t.     | b.t.     | 6,24E+06 | 5,72E+06 | 5,20E+06 | b.t.     | b.t.     | b.t.     | b.t.     | b.t.     | b.t.     | 9,90E+06 | 1,10E+07 | 1,05E+07 | 3,40E+06 | 3,06E+06 | 1,90E+07 |          |          |
| L8BAJ3 | Ubiquitin C                                                   | 1,23E+06 | 7,60E+05 | 1,70E+06 | 2,80E+06 | 6,60E+06 | 2,80E+07 | 1,10E+07 | 9,13E+06 | 7,30E+06 | 3,00E+06 | 2,60E+06 | 5,90E+07 | 1,08E+08 | 1,20E+08 | 1,14E+08 | 1,30E+08 | 4,20E+07 | 1,80E+07 |          |          |
| MOQYS1 | 60S ribosomal protein L13a                                    | b.t.     | 1,80E+06 | 2,70E+06 | 1,80E+06 | 3,06E+06 | 3,40E+06 | 3,23E+06 | 4,00E+06 | 3,60E+06 | 2,88E+06 |          |          |
| MOQZC5 | 40S ribosomal protein S11                                     | b.t.     | 8,30E+06 | 1,25E+07 | 8,30E+06 | 5,49E+06 | 6,10E+06 | 5,80E+06 | 1,30E+07 | 1,17E+07 | 9,36E+06 |          |          |
| MOR0F0 | 40S ribosomal protein S5                                      | b.t.     | 3,06E    |          |          |          |          |          |          |          |

|        |                                                           |          |          |          |          |          |          |          |          |          |          |          |          |          |          |          |          |          |          |          |
|--------|-----------------------------------------------------------|----------|----------|----------|----------|----------|----------|----------|----------|----------|----------|----------|----------|----------|----------|----------|----------|----------|----------|----------|
| O00303 | Eukaryotic translation initiation factor 3 subunit F      | b.t.     | 1,08E+07 | 1,20E+07 | 1,14E+07 | 1,00E+07 | 8,70E+06 | 8,10E+06 |
| O14920 | Inhibitor of nuclear factor κ-B kinase subunit B          | b.t.     | b.t.     | b.t.     | 2,31E+06 | 2,10E+06 | 1,80E+06 | 2,21E+06 | 2,15E+06 | 2,18E+06 | b.t.     | b.t.     | b.t.     | 2,11E+06 | 1,80E+06 | 1,00E+06 | 2,31E+06 | 2,45E+06 | 2,18E+06 |          |
| O15067 | Phosphoribosylformylglycinamidine synthase 2              | b.t.     | b.t.     | b.t.     | 3,11E+06 | 3,00E+06 | 2,30E+06 | b.t.     | b.t.     | b.t.     | 2,20E+06 | 3,30E+06 | 2,20E+06 | 7,92E+06 | 8,80E+06 | 8,36E+06 | 4,30E+06 | 3,87E+06 | 6,50E+06 |          |
| O15144 | Actin-related protein 2/3 complex subunit 2               | b.t.     | b.t.     | b.t.     | 2,76E+06 | 2,53E+06 | 2,30E+06 | b.t.     | 8,60E+06 | 7,74E+06 | 9,50E+05 |
| O43143 | Pre-mRNA-splicing factor ATP-dependent RNA helicase DHX15 | 1,30E+06 | 1,30E+06 | 1,95E+06 | 4,62E+06 | 6,30E+06 | 2,10E+06 | b.t.     | b.t.     | b.t.     | b.t.     | b.t.     | b.t.     | 6,84E+06 | 7,60E+06 | 7,22E+06 | 5,60E+06 | 1,00E+07 | 9,30E+06 |          |
| O43175 | D-3-phosphoglycerate dehydrogenase                        | b.t.     | b.t.     | b.t.     | 3,72E+06 | 3,41E+06 | 3,10E+06 | b.t.     | b.t.     | b.t.     | 2,70E+06 | 2,00E+06 | 3,40E+06 | 1,17E+07 | 1,30E+07 | 1,24E+07 | 1,30E+07 | 1,70E+06 | 1,00E+07 |          |
| O43242 | 26S proteasome non-ATPase regulatory subunit 3            | b.t.     | b.t.     | b.t.     | 7,44E+05 | 6,82E+05 | 6,20E+05 | b.t.     | 2,30E+06 | 5,10E+06 | 5,20E+06 |
| O43390 | Heterogeneous nuclear ribonucleoprotein R                 | b.t.     | b.t.     | b.t.     | 4,92E+06 | 4,51E+06 | 4,10E+06 | 3,15E+06 | 2,63E+06 | 2,10E+06 | 2,00E+06 | 1,60E+06 | 2,40E+06 | 7,83E+06 | 8,70E+06 | 8,27E+06 | 4,60E+06 | 4,14E+06 | 6,20E+06 |          |
| O43592 | Exportin-T                                                | b.t.     | b.t.     | b.t.     | 4,80E+06 | 4,80E+06 | 6,24E+06 | b.t.     | 6,60E+06 | 5,94E+06 | 5,50E+06 |
| O43707 | Alpha-actinin-4                                           | b.t.     | b.t.     | b.t.     | 7,09E+06 | 6,20E+06 | 5,70E+06 | b.t.     | b.t.     | b.t.     | 1,60E+06 | 1,60E+06 | 1,60E+06 | 2,07E+07 | 2,30E+07 | 2,19E+07 | 1,10E+07 | 1,30E+07 | 1,40E+07 |          |
| O43776 | Asparagine-tRNA ligase                                    | 1,10E+06 | 1,10E+06 | 1,65E+06 | 2,70E+06 | 3,30E+06 | 1,50E+06 | b.t.     | b.t.     | b.t.     | b.t.     | b.t.     | b.t.     | 4,23E+06 | 4,70E+06 | 4,47E+06 | 2,70E+06 | 5,50E+06 | 1,70E+07 |          |
| O60218 | Aldo-keto reductase family 1 member B10                   | 3,50E+06 | 2,50E+06 | 4,50E+06 | 2,04E+07 | 1,00E+07 | 2,20E+07 | 1,37E+07 | 5,40E+06 | 1,10E+07 | 1,50E+06 | 3,90E+07 | 7,50E+07 | 1,26E+08 | 1,40E+08 | 1,33E+08 | 1,10E+08 | 1,10E+07 | 1,00E+07 |          |
| O60506 | Heterogeneous nuclear ribonucleoprotein Q                 | b.t.     | b.t.     | b.t.     | 7,47E+06 | 5,00E+06 | 7,10E+06 | 6,60E+06 | 5,50E+06 | 4,40E+06 | 2,00E+06 | 2,00E+06 | 3,00E+06 | 2,16E+07 | 2,40E+07 | 2,28E+07 | 9,80E+06 | 3,50E+06 | 1,40E+07 |          |
| O60701 | UDP-glucose 6-dehydrogenase                               | 2,70E+06 | 2,70E+06 | 4,05E+06 | 4,14E+07 | 5,90E+07 | 1,70E+07 | 5,90E+05 | 1,40E+06 | 5,10E+06 | 5,90E+06 | 1,40E+07 | 1,26E+08 | 1,40E+08 | 1,33E+08 | 5,30E+07 | 2,20E+07 | 7,70E+07 |          |          |
| O60814 | Histone H2B type 1-K                                      | b.t.     | 1,08E+07 | 1,20E+07 | 1,14E+07 | b.t.     | b.t.     | b.t.     |          |
| O75083 | WD repeat-containing protein 1                            | b.t.     | 4,32E+06 | 4,80E+06 | 4,56E+06 | 3,30E+06 | 3,70E+06 | 4,60E+06 |          |
| O75367 | Core histone macro-H2A.1                                  | b.t.     | b.t.     | b.t.     | 3,84E+06 | 3,52E+06 | 3,20E+06 | 1,34E+06 | 1,11E+06 | 8,90E+05 | 5,20E+06 | 7,80E+06 | 5,20E+06 | 6,84E+06 | 7,60E+06 | 7,22E+06 | 4,50E+06 | 4,05E+06 | 3,24E+06 |          |
| O75369 | Filamin-B                                                 | 8,30E+05 | 8,30E+05 | 1,25E+06 | 1,00E+06 | 7,60E+06 | 4,50E+06 | b.t.     | b.t.     | b.t.     | 3,20E+06 | 3,60E+06 | 9,40E+06 | 3,87E+07 | 4,30E+07 | 4,09E+07 | 1,30E+07 | 1,50E+07 | 3,10E+07 |          |
| O75390 | Citrate synthase, mitochondrial                           | b.t.     | b.t.     | b.t.     | 7,22E+06 | 8,70E+06 | 4,10E+06 | 1,50E+06 | 1,25E+06 | 1,00E+06 | 2,30E+06 | 2,90E+06 | 4,05E+06 | 1,08E+07 | 1,20E+07 | 1,14E+07 | 1,70E+07 | 1,20E+07 | 2,40E+07 |          |
| O75533 | Splicing factor 3B subunit 1                              | b.t.     | b.t.     | b.t.     | 2,24E+06 | 2,80E+06 | 1,20E+06 | b.t.     | 1,30E+06 | 1,17E+06 | 9,36E+05 |
| O75643 | U5 small nuclear ribonucleoprotein 200 kDa helicase       | 9,90E+04 | 1,49E+05 | 9,90E+04 | 3,48E+06 | 4,30E+06 | 1,90E+06 | b.t.     | 1,30E+06 | 1,17E+06 | 9,36E+05 |
| O76003 | Glutaredoxin-3                                            | b.t.     | 6,75E+06 | 7,50E+06 | 7,13E+06 | 8,90E+06 | 8,90E+06 | 7,12E+06 |          |
| O76021 | Ribosomal L1 domain-containing protein 1                  | b.t.     | b.t.     | b.t.     | 2,26E+06 | 1,30E+06 | 2,30E+06 | 2,40E+06 | 2,00E+06 | 1,60E+06 | b.t.     | b.t.     | b.t.     | 7,56E+06 | 8,40E+06 | 7,98E+06 | 4,10E+06 | 3,69E+06 | 4,00E+05 |          |
| O95373 | Importin-7                                                | b.t.     | b.t.     | b.t.     | 3,00E+06 | 3,00E+06 | 3,90E+06 | b.t.     | b.t.     | b.t.     | b.t.     | b.t.     | b.t.     | 3,06E+06 | 3,40E+06 | 3,23E+06 | b.t.     | b.t.     | b.t.     |          |
| O95861 | 3'(2'),5'-bisphosphate nucleotidase 1                     | b.t.     | b.t.     | b.t.     | 2,64E+06 | 2,42E+06 | 2,20E+06 | b.t.     |          |
| O95994 | Anterior gradient protein 2                               | b.t.     | b.t.     | b.t.     | 1,13E+07 | 1,03E+07 | 9,40E+06 | 2,31E+07 | 2,20E+06 | 2,20E+07 | 5,30E+06 | 9,00E+06 | 7,40E+06 | 8,10E+07 | 9,00E+07 | 8,55E+07 | 1,60E+08 | 3,30E+06 | 2,80E+06 |          |
| P00338 | L-lactate dehydrogenase A                                 | 2,00E+06 | 2,00E+06 | 3,00E+06 | 8,14E+06 | 9,70E+06 | 4,70E+06 | 6,23E+06 | 6,60E+05 | 5,90E+06 | 3,70E+06 | 1,10E+06 | 5,20E+07 | 1,17E+08 | 1,30E+08 | 1,24E+08 | 1,50E+08 | 8,90E+06 | 3,10E+06 |          |
| P00492 | Hypoxanthine-guanine phosphoribosyltransferase            | b.t.     | b.t.     | b.t.     | 6,48E+06 | 5,94E+06 | 5,40E+06 | 2,10E+06 | 1,75E+06 | 1,40E+06 | 2,90E+06 | 4,35E+06 | 2,90E+06 | b.t.     | b.t.     | b.t.     | 1,20E+07 | 1,08E+07 | 8,64E+06 |          |
| P00505 | Aspartate aminotransferase, mitochondrial                 | 1,40E+06 | 2,10E+06 | 1,40E+06 | 6,30E+05 | 9,90E+06 | 1,40E+07 | b.t.     | b.t.     | b.t.     | 3,10E+06 | 3,80E+06 | 5,70E+06 | 2,97E+07 | 3,30E+07 | 3,14E+07 | 2,40E+07 | 4,90E+07 | 2,40E+07 |          |
| P00558 | Phosphoglycerate kinase 1                                 | 5,15E+06 | 6,30E+06 | 4,00E+06 | 1,60E+06 | 1,40E+08 | 6,90E+07 | 1,96E+07 | 9,20E+06 | 1,50E+07 | 7,80E+07 | 7,30E+07 | 5,70E+07 | 4,86E+08 | 5,40E+08 | 5,13E+08 | 1,90E+08 | 3,30E+08 | 3,10E+08 |          |
| P00966 | Argininosuccinate synthase                                | b.t.     | 2,88E+06 | 3,20E+06 | 3,04E+06 | 3,80E+06 | 5,00E+06 | 4,80E+06 |          |
| P01375 | Tumor necrosis factor α                                   | b.t.     | b.t.     | b.t.     | 4,21E+06 | 5,20E+06 | 2,30E+06 | 7,85E+07 | 3,70E+07 | 1,20E+07 | b.t.     | b.t.     | b.t.     | 6,66E+05 | 7,40E+05 | 7,03E+05 | 4,20E+06 | 3,78E+06 | 1,00E+07 |          |
| P02533 | Keratin, type I cytoskeletal 14                           | b.t.     | b.t.     | b.t.     | 3,95E+06 | 4,40E+06 | 2,50E+06 | b.t.     | 6,84E+06 | 6,16E+06 | 5,70E+06 |          |
| P02765 | Alpha-2-HS-glycoprotein                                   | b.t.     | b.t.     | b.t.     | 8,60E+05 | 8,60E+05 | 1,12E+06 | b.t.     | b.t.     | b.t.     | b.t.     | b.t.     | b.t.     | 4,77E+06 | 5,30E+06 | 5,04E+06 | 9,71E+06 | 7,10E+06 | 8,80E+06 |          |
| P03886 | NADH-ubiquinone oxidoreductase                            | 4,90E+05 | 4,90E+05 | 7,35E+05 | b.t.     | 8,91E+06 | 9,90E+06 | 9,41E+06 | 1,10E+06 | 2,30E+07 | 1,20E+07 |          |
| P04040 | Catalase                                                  | b.t.     | b.t.     | b.t.     | 1,13E+07 | 1,03E+07 | 9,40E+06 | 2,31E+07 | 2,20E+06 | 2,20E+07 | 5,30E+06 | 9,00E+06 | 7,40E+06 | 8,10E+07 | 9,00E+07 | 8,55E+07 | 1,60E+08 | 3,30E+06 | 2,80E+06 |          |
| P04083 | Annexin A1                                                | 2,73E+06 | 4,90E+06 | 5,60E+05 | 2,00E+07 | 1,00E+07 | 4,80E+06 | 1,00E+06 | 4,30E+06 | 1,24E+07 | 6,80E+06 | 1,80E+07 | 6,21E+07 | 6,90E+07 | 6,56E+07 | 3,70E+07 | 3,33E+07 | 5,70E+06 |          |          |
| P04179 | Superoxide dismutase [Mn], mitochondrial                  | 1,00E+06 | 1,00E+06 | 1,50E+06 | 4,40E+05 | 1,80E+07 | 1,00E+07 | 4,50E+06 | 3,75E+06 | 3,00E+06 | 2,40E+07 | 3,60E+07 | 2,40E+07 | 5,49E+07 | 6,10E+07 | 5,80E+07 | 3,50E+07 | 3,30E+06 | 2,80E+06 |          |
| P04264 | Keratin, type II cytoskeletal 1                           | 6,25E+06 | 1,00E+07 | 2,50E+06 | 4,50E+06 | 1,20E+08 | 2,60E+07 | 3,90E+06 | 1,20E+06 | 3,30E+06 | 5,90E+06 | 6,00E+06 | 1,20E+07 | 1,80E+08 | 2,00E+08 | 1,90E+08 | 2,90E+07 | 2,80E+07 | 9,10E+07 |          |
| P04406 | Glyceraldehyde-3-phosphate dehydrogenase                  | 5,80E+06 | 3,70E+06 | 7,90E+06 | 1,09E+08 | 2,10E+07 | 1,40E+08 | 3,17E+07 | 5,40E+06 | 2,90E+07 | 8,60E+06 | 6,00E+07 | 2,90E+08 | 4,05E+08 | 4,50E+08 | 4,28E+08 | 1,50E+08 | 1,10E+07 | 4,10E+07 |          |
| P05120 | Plasminogen activator inhibitor 2                         | 2,20E+06 | 2,20E+06 | 3,30E+06 | 1,16E+07 | 1,30E+07 | 7,30E+06 | 6,30E+06 | 5,25E+06 | 4,20E+06 | 3,20E+06 | 3,40E+06 | 5,30E+06 | 3,33E+07 | 3,70E+07 | 3,52E+07 | 2,00E+07 | 1,20E+07 | 2,30E+07 |          |
| P05198 | Eukaryotic translation initiation factor 2 subunit 1      | b.t.     | b.t.     | b.t.     | 1,16E+07 | 1,07E+07 | 9,70E+06 | b.t.     | b.t.     | b.t.     | 3,60E+06 | 5,40E+06 | 3,60E+06 | 1,26E+07 | 1,40E+07 | 1,33E+07 | 1,60E+07 | 1,44E+07 | 1,15E+07 |          |
| P05783 | Keratin, type I cytoskeletal 18                           | b.t.     | b.t.     | b.t.     | 3,14E+06 | 3,20E+06 | 2,20E+06 | b.t.     | b.t.     | b.t.     | 1,90E+06 | 2,70E+06 | 1,50E+06 | 8,01E+06 | 8,90E+06 | 8,46E+06 | 1,00E+07 | 1,70E+07 | 1,30E+07 |          |
| P05787 | Keratin, type II cytoskeletal 8                           | b.t.     | b.t.     | b.t.     | 4,92E+06 | 4,51E+06 | 4,10E+06 | 3,00E+06 | 2,50E+06 | 2,00E+06 | 6,10E+06 | 3,40E+06 | 8,80E+06 | 3,15E+07 | 3,50E+07 | 3,33E+07 | 2,20E+07 | 1,10E+07 | 1,20E+07 |          |
| P06703 | Protein S100-A6                                           | b.t.     | 1,90E+06 | 2,85E+06 | 1,90E+06 | 6,30E+06 | 7,00E+06 | 6,65E+06 | 1,90E+07 | 1,71E+07 | 1,37E+07 |          |
| P06733 | Alpha-enolase                                             | 1,31E+07 | 2,10E+07 | 5,20E+06 | 8,20E+06 | 2,50E+08 | 1,40E+08 | 1,86E+07 | 5,20E+06 | 1,60E+07 | 6,50E+07 | 8,50E+07 | 1,70E+08 | 5,40E+08 | 6,00E+08 | 5,70E+08 | 2,90E+08 | 4,40E+08 | 4,10E+08 |          |
| P06744 | Glucose-6-phosphate isomerase                             | 2,00E+06 | 2,00E+06 | 3,00E+06 | 3,28E+07 | 3,90E+07 | 1,90E+07 | 4,50E+06 | 1,40E+06 | 3,80E+06 | 3,90E+06 | 7,40E+06 | 1,90E+07 | 7,47E+07 | 8,30E+07 | 7,89E+07 | 4,00E+07 | 6,70E+07 | 7,20E+07 |          |
| P06899 | Histone H2B type 1-J                                      | 3,48E+06 | 5,10E+06 | 3,40E+06 | b.t.     | b.t.     | b.t.     | 4,50E+06 | 3,75E+06 | 3,00E+06 | 1,30E+07 | 1,95E+07 | 1,30E+07 | b.t.     | b.t.     | b.t.     | 1,90E+07 | 1,71E+07 | 1,37E+07 |          |
| P07711 | Cathepsin L1                                              | b.t.     | 1,10E+06 | 1,65E+06 | 2,20E+06 | 2,07E+06 | 2,30E+06 | 2,19E+06 | b.t.     | b.t.     | b.t.     |          |
| P07741 | Adenine phosphoribosyltransferase                         | b.t.     | b.t.     | b.t.     | 2,16E+06 | 1,98E+06 | 1,80E+06 | b.t.     | b.t.     | b.t.     | 5,70E+06 | 8,55E+06 | 5,70E+06 | 7,20E+06 | 8,00E+06 | 7,60E+06 | 9,70E+06 | 2,60E+05 | 2,08E+05 |          |
| P07814 | Bifunctional glutamate/proline-tRNA ligase                | b.t.     | b.t.     | b.t.     | 1,52E+06 | 5,20E+05 | 1,80E+06 | b.t.     | b.t.     | b.t.     | b.t.     | b.t.     | b.t.     | 4,32E+06 | 4,80E+06 | 4,56E+06 | 4,30E+06 | 6,50E+06 | 7,20E+06 |          |
| P07900 | Heat shock protein HSP 90-α                               | 2,10E+05 | 1,30E+05 | 2,90E+05 | 1,08E+08 | 1,20E+08 | 1,14E+08 | 6,60E+07 | 5,60E+07 | 9,30E+07 | 4,60E+05 | 1,50E+05 | 2,90E+05 | 2,20E+06 | 1,20E+07 | 1,20E+07 | 3,30E+06 | 2,20E+06 | 2,20E+06 |          |
| P07954 | Fumarate hydratase, mitochondrial                         | b.t.     | b.t.     | b.t.     | 4,56E+06 | 4,18E+06 | 3,80E+06 | 2,10E+06 | 1,75E+06 | 1,40E+06 | b.t.     | b.t.     | b.t.     | 2,07E+07 | 2,30E+07 | 2,19E+07 | 9,00E+06 | 5,70E+06 | 7,70E+06 |          |
| P08174 | Complement decay-accelerating factor                      | b.t.     | 2,50E+06 | 1,10E+06 | 3,90E+06 | 9,90E+06 | 1,10E+07 | 1,05E+07 | 1,20E+07 | 1,00E+07 | 1,60E+07 |          |
| P08238 | Heat shock protein HSP 90-beta                            | b.t.     | b.t.     | b.t.     | 7,11E+07 | 7,90E+07 | 7,51E+07 | 5,40E+07 | 2,70E+07 | 7,00E+07 | 1,30E+05 | 8,10E+05 | 1,90E+05 | 1,15E+07 | 1,10E+07 | 8,60E+06 | 3,05E+06 | 1,30E+06 | 2,40E+06 |          |
| P08727 | Keratin, type I cytoskeletal 19                           | b.t.     | b.t.     | b.t.     | 2,69E+06 | 3,70E+06 | 1,20E+06 | b.t.     | b.t.     | b.t.     | 1,30E+06 | 2,40E+06 | 1,50E+06 | 1,44E+07 | 1,60E+07 | 1,52E+07 |          |          |          |          |

|        |                                                                   |          |          |          |          |          |          |          |          |          |          |          |          |          |          |          |          |          |          |
|--------|-------------------------------------------------------------------|----------|----------|----------|----------|----------|----------|----------|----------|----------|----------|----------|----------|----------|----------|----------|----------|----------|----------|
| P11169 | Solute carrier family 2, facilitated glucose transporter member 3 | b.t.     | b.t.     | b.t.     | 3,90E+06 | 3,90E+06 | 5,07E+06 | b.t.     | b.t.     | b.t.     | b.t.     | b.t.     | b.t.     | 2,97E+06 | 3,30E+06 | 3,14E+06 | 7,20E+06 | 6,48E+06 | 6,00E+06 |
| P11279 | Lysosome-associated membrane glycoprotein 1                       | b.t.     | b.t.     | b.t.     | 3,40E+06 | 3,40E+06 | 4,42E+06 | b.t.     |
| P11413 | Glucose-6-phosphate 1-dehydrogenase                               | 2,25E+06 | 1,70E+06 | 2,80E+06 | 2,00E+06 | 1,90E+07 | 2,50E+07 | 2,39E+07 | 3,70E+06 | 2,20E+07 | 8,80E+06 | 1,70E+07 | 2,20E+07 | 1,44E+08 | 1,60E+08 | 1,52E+08 | 7,90E+07 | 1,00E+08 | 1,20E+08 |
| P11940 | Polyadenylate-binding protein 1                                   | b.t.     | 2,30E+06 | 2,30E+06 | 3,45E+06 | 1,44E+07 | 1,60E+07 | 1,52E+07 | 5,90E+06 | 7,70E+06 | 1,50E+07 |
| P12081 | Histidine--tRNA ligase, cytoplasmic                               | b.t.     | b.t.     | b.t.     | 4,30E+06 | 4,30E+06 | 5,59E+06 | b.t.     | b.t.     | b.t.     | 9,30E+05 | 9,30E+05 | 1,40E+06 | 1,17E+07 | 1,30E+07 | 1,24E+07 | 7,80E+06 | 8,10E+06 | 8,40E+06 |
| P12268 | Inosine-5'-monophosphate dehydrogenase 2                          | b.t.     | b.t.     | b.t.     | 5,28E+06 | 4,84E+06 | 4,40E+06 | b.t.     | b.t.     | b.t.     | 2,95E+06 | 1,90E+06 | 4,00E+06 | 1,26E+07 | 1,40E+07 | 1,33E+07 | 9,30E+06 | 9,90E+06 | 1,20E+07 |
| P12814 | Alpha-actinin-1                                                   | 6,50E+05 | 9,75E+05 | 6,50E+05 | 8,29E+06 | 4,40E+06 | 8,70E+06 | b.t.     | b.t.     | b.t.     | 7,50E+05 | 7,50E+05 | 1,13E+06 | 1,80E+07 | 2,00E+07 | 1,90E+07 | 6,70E+06 | 3,90E+06 | 1,40E+07 |
| P12931 | Proto-oncogene tyrosine-protein kinase Src                        | b.t.     | 3,80E+06 | 3,30E+06 | 5,00E+06 |
| P13010 | X-ray repair cross-complementing protein 5                        | b.t.     | b.t.     | b.t.     | 1,26E+07 | 1,70E+07 | 5,80E+06 | b.t.     | b.t.     | b.t.     | 3,25E+06 | 2,70E+06 | 3,80E+06 | 1,71E+07 | 1,90E+07 | 1,81E+07 | 1,80E+07 | 2,30E+07 | 2,30E+07 |
| P13489 | Ribonuclease inhibitor                                            | b.t.     | b.t.     | b.t.     | 5,40E+06 | 4,95E+06 | 4,50E+06 | b.t.     | b.t.     | b.t.     | 1,50E+06 | 1,50E+06 | 2,25E+06 | 6,93E+06 | 7,70E+06 | 7,32E+06 | 3,40E+06 | 3,06E+06 | 1,10E+07 |
| P13639 | Elongation factor 2                                               | 2,36E+06 | 3,80E+06 | 9,10E+05 | 2,53E+07 | 1,70E+07 | 2,40E+07 | 8,65E+06 | 1,30E+06 | 8,00E+06 | 4,90E+06 | 5,90E+06 | 2,40E+07 | 8,01E+07 | 8,90E+07 | 8,46E+07 | 3,50E+07 | 7,90E+07 | 3,10E+07 |
| P13645 | Keratin, type I cytoskeletal 10                                   | 2,73E+06 | 4,50E+06 | 9,60E+05 | 2,00E+06 | 7,30E+07 | 1,00E+07 | 1,11E+07 | 9,25E+06 | 7,40E+06 | 2,40E+06 | 2,40E+06 | 8,20E+06 | 6,84E+07 | 7,60E+07 | 7,22E+07 | 1,30E+07 | 1,80E+07 | 4,50E+07 |
| P13647 | Keratin, type II cytoskeletal 5                                   | 9,10E+05 | 9,10E+05 | 1,37E+06 | b.t.     | 9,00E+05 | 3,00E+06 | 1,10E+07 |
| P13667 | Protein disulfide-isomerase A4                                    | b.t.     | b.t.     | b.t.     | 1,25E+07 | 1,30E+07 | 8,60E+06 | b.t.     | b.t.     | b.t.     | 2,50E+06 | 1,40E+06 | 3,60E+06 | 2,43E+07 | 2,70E+07 | 2,57E+07 | 1,80E+07 | 2,40E+07 | 3,10E+07 |
| P13674 | Prolyl 4-hydroxylase subunit alpha-1                              | b.t.     | 3,15E+07 | 3,50E+07 | 3,33E+07 | 1,10E+07 | 9,90E+06 | 7,92E+06 |
| P13693 | Translationally-controlled tumor protein                          | b.t.     | 4,30E+06 | 6,45E+06 | 4,30E+06 | 6,39E+06 | 7,10E+06 | 6,75E+06 | 8,30E+06 | 7,47E+06 | 5,98E+06 |
| P13804 | Electron transfer flavoprotein subunit alpha, mitochondrial       | b.t.     | b.t.     | b.t.     | 3,60E+06 | 3,30E+06 | 3,00E+06 | b.t.     | b.t.     | b.t.     | b.t.     | b.t.     | b.t.     | 2,25E+07 | 2,50E+07 | 2,38E+07 | 5,04E+06 | 4,54E+06 | 4,20E+06 |
| P14550 | Alcohol dehydrogenase [NADP(+)]                                   | b.t.     | b.t.     | b.t.     | 2,50E+06 | 2,50E+06 | 3,25E+06 | b.t.     | b.t.     | b.t.     | 3,50E+06 | 5,25E+06 | 3,50E+06 | 3,69E+06 | 4,10E+06 | 3,90E+06 | 5,10E+06 | 4,59E+06 | 3,60E+05 |
| P14625 | Endoplasmic                                                       | 2,40E+06 | 2,40E+06 | 3,60E+06 | 2,00E+06 | 9,40E+06 | 2,20E+07 | 3,15E+06 | 1,70E+06 | 2,30E+06 | 6,00E+06 | 1,30E+07 | 1,00E+07 | 1,17E+08 | 1,30E+08 | 1,24E+08 | 6,70E+07 | 9,60E+07 | 1,10E+08 |
| P14866 | Heterogeneous nuclear ribonucleoprotein L                         | b.t.     | b.t.     | b.t.     | 3,84E+06 | 3,52E+06 | 3,20E+06 | b.t.     | b.t.     | b.t.     | 3,60E+06 | 5,40E+06 | 3,60E+06 | 1,08E+07 | 1,20E+07 | 1,14E+07 | 2,00E+07 | 1,80E+07 | 1,44E+07 |
| P14868 | Aspartate-tRNA ligase, cytoplasmic                                | b.t.     | 8,91E+06 | 9,90E+06 | 9,41E+06 | 3,90E+06 | 3,51E+06 | 1,10E+07 |
| P15121 | Aldose reductase                                                  | b.t.     | 6,80E+06 | 1,02E+07 | 6,80E+06 | 1,44E+07 | 1,60E+07 | 1,52E+07 | 1,50E+07 | 1,35E+07 | 1,08E+07 |
| P15170 | Eukaryotic peptide chain release factor GTP-binding subunit ERF3A | b.t.     | 4,40E+06 | 1,20E+07 | 8,60E+06 |
| P15559 | NAD(P)H dehydrogenase [quinone] 1                                 | 6,65E+06 | 6,60E+06 | 6,70E+06 | 3,28E+06 | 3,20E+06 | 2,40E+06 | 4,40E+06 | 2,20E+06 | 3,30E+06 | 1,74E+07 | 7,50E+05 | 3,40E+07 | 4,50E+07 | 5,00E+07 | 4,75E+07 | 8,90E+07 | 6,90E+06 | 4,80E+06 |
| P15880 | 40S ribosomal protein S2                                          | b.t.     | b.t.     | b.t.     | 1,68E+06 | 1,54E+06 | 1,40E+06 | b.t.     | b.t.     | b.t.     | 5,40E+06 | 8,10E+06 | 5,40E+06 | 1,17E+07 | 1,30E+07 | 1,24E+07 | 1,30E+07 | 1,17E+07 | 8,60E+05 |
| P16083 | Ribosyldihydronicotinamide dehydrogenase [quinone]                | b.t.     | 2,70E+06 | 4,05E+06 | 2,70E+06 | b.t.     | b.t.     | b.t.     | 5,50E+06 | 4,95E+06 | 3,96E+06 |
| P16152 | Carbonyl reductase [NADPH] 1                                      | b.t.     | b.t.     | b.t.     | 6,72E+06 | 6,16E+06 | 5,60E+06 | 1,65E+06 | 1,38E+06 | 1,10E+06 | 7,70E+06 | 1,16E+07 | 7,70E+06 | 4,86E+07 | 5,40E+07 | 5,13E+07 | 2,20E+07 | 1,98E+07 | 1,40E+06 |
| P16402 | Histone H1.3                                                      | b.t.     | 1,40E+07 | 2,10E+07 | 1,40E+07 | 3,33E+07 | 3,70E+07 | 3,52E+07 | 3,10E+07 | 2,79E+07 | 2,23E+07 |
| P16403 | Histone H1.2                                                      | b.t.     | 1,40E+07 | 2,10E+07 | 1,40E+07 | 3,33E+07 | 3,70E+07 | 3,52E+07 | 3,10E+07 | 2,79E+07 | 2,23E+07 |
| P16930 | Fumarylacetoacetase                                               | b.t.     | b.t.     | b.t.     | 3,00E+06 | 3,00E+06 | 3,90E+06 | b.t.     | 1,20E+06 | 1,08E+06 | 8,64E+05 |
| P17174 | Aspartate aminotransferase, cytoplasmic                           | b.t.     | b.t.     | b.t.     | 3,69E+06 | 2,20E+06 | 3,70E+06 | 2,25E+06 | 1,88E+06 | 1,50E+06 | 6,40E+05 | 6,40E+05 | 9,60E+05 | 6,75E+06 | 7,50E+06 | 7,13E+06 | 3,10E+06 | 1,20E+07 | 3,60E+06 |
| P17655 | Calpain-2 catalytic subunit                                       | b.t.     | b.t.     | b.t.     | 2,64E+06 | 2,42E+06 | 2,20E+06 | b.t.     | b.t.     | b.t.     | b.t.     | b.t.     | b.t.     | 5,13E+06 | 5,70E+06 | 5,42E+06 | 3,20E+06 | 2,88E+06 | 3,90E+06 |
| P17987 | T-complex protein 1 subunit alpha                                 | b.t.     | 1,26E+07 | 1,40E+07 | 1,33E+07 | 4,80E+06 | 4,32E+06 | 6,50E+06 |
| P18124 | 60S ribosomal protein L7                                          | b.t.     | b.t.     | b.t.     | 4,32E+06 | 3,96E+06 | 3,60E+06 | 2,20E+06 | 1,20E+06 | 1,60E+06 | 7,30E+06 | 1,10E+07 | 7,30E+06 | 1,53E+07 | 1,70E+07 | 1,62E+07 | 2,20E+07 | 1,98E+07 | 1,58E+07 |
| P19367 | Hexokinase-1                                                      | b.t.     | b.t.     | b.t.     | 2,50E+06 | 2,50E+06 | 3,25E+06 | b.t.     | 7,40E+05 | 4,80E+06 | 3,84E+06 |
| P19623 | Spermidine synthase                                               | b.t.     | 1,20E+07 | 1,08E+07 | 8,64E+06 |
| P19838 | Nuclear factor NFkB p105                                          | 1,70E+05 | 1,70E+05 | 2,55E+05 | 1,13E+07 | 5,70E+07 | 1,20E+07 | 7,65E+07 | 6,38E+07 | 5,10E+07 | 1,90E+05 | 6,40E+05 | 1,90E+05 | 6,93E+07 | 7,70E+06 | 7,32E+06 | 4,10E+06 | 2,40E+06 | 1,30E+06 |
| P20073 | Annexin A7                                                        | b.t.     | 7,11E+06 | 7,90E+06 | 7,51E+06 | 1,21E+07 | 1,50E+07 | 6,50E+06 |
| P20337 | Ras-related protein Rab-38                                        | b.t.     | b.t.     | b.t.     | 2,88E+06 | 2,64E+06 | 2,40E+06 | 4,05E+06 | 3,38E+06 | 2,70E+06 | 3,70E+06 | 5,55E+06 | 3,70E+06 | b.t.     | b.t.     | b.t.     | 1,40E+07 | 1,26E+07 | 1,01E+07 |
| P20618 | Proteasome subunit beta-type-1                                    | 3,30E+05 | 3,30E+05 | 4,95E+05 | 2,04E+06 | 1,87E+06 | 1,70E+06 | b.t.     | b.t.     | b.t.     | 3,60E+06 | 5,40E+06 | 3,60E+06 | 8,46E+06 | 9,40E+06 | 8,93E+06 | 9,00E+06 | 8,10E+06 | 5,10E+05 |
| P20700 | Lamin-B1                                                          | b.t.     | 7,70E+06 | 6,93E+06 | 5,54E+06 |
| P21333 | Filamin-A                                                         | 1,70E+06 | 1,70E+06 | 2,55E+06 | 4,78E+06 | 5,50E+06 | 2,90E+06 | b.t.     | b.t.     | b.t.     | 1,90E+06 | 2,30E+06 | 1,50E+06 | 1,26E+07 | 1,40E+07 | 1,33E+07 | 7,00E+06 | 6,00E+06 | 1,70E+07 |
| P21796 | Voltage-dependent anion-selective channel protein 1               | b.t.     | 1,70E+06 | 2,55E+06 | 1,70E+06 | 2,07E+07 | 2,30E+07 | 2,19E+07 | 2,20E+07 | 1,98E+07 | 1,58E+07 |
| P22087 | rRNA 2'-O-methyltransferase fibrillarin                           | b.t.     | 9,90E+06 | 1,10E+07 | 1,05E+07 | 1,20E+07 | 1,08E+07 | 8,64E+06 |
| P22102 | Trifunctional purine biosynthetic protein adenosine-3             | b.t.     | b.t.     | b.t.     | 2,80E+06 | 2,80E+06 | 3,64E+06 | b.t.     | b.t.     | b.t.     | 5,90E+05 | 8,85E+05 | 5,90E+05 | 2,79E+06 | 3,10E+06 | 2,95E+06 | 1,30E+06 | 5,60E+06 | 4,40E+06 |
| P22626 | Heterogeneous nuclear ribonucleoproteins A2/B1                    | b.t.     | b.t.     | b.t.     | 8,40E+06 | 7,70E+06 | 7,00E+06 | 7,80E+06 | 6,50E+06 | 5,20E+06 | 6,50E+06 | 2,70E+06 | 1,20E+07 | 6,93E+07 | 7,70E+07 | 7,32E+07 | 2,50E+07 | 4,20E+06 | 1,30E+06 |
| P23246 | Splicing factor, proline- and glutamine-rich                      | b.t.     | b.t.     | b.t.     | 2,52E+06 | 2,31E+06 | 2,10E+06 | 2,40E+06 | 2,00E+06 | 1,60E+06 | 1,33E+06 | 1,70E+06 | 9,60E+05 | 4,86E+06 | 5,40E+06 | 5,13E+06 | 7,90E+06 | 7,11E+06 | 5,69E+06 |
| P23284 | Peptidyl-prolyl cis-trans isomerase B                             | b.t.     | b.t.     | b.t.     | 9,70E+05 | 3,20E+06 | 1,90E+07 | 6,55E+06 | 1,60E+06 | 3,50E+06 | 1,70E+07 | 2,55E+07 | 1,70E+07 | 7,11E+07 | 7,90E+07 | 7,51E+07 | 4,90E+07 | 4,41E+07 | 1,10E+06 |
| P23368 | NAD-dependent malic enzyme, mitochondrial                         | b.t.     | b.t.     | b.t.     | 2,60E+06 | 2,60E+06 | 3,38E+06 | b.t.     | b.t.     | b.t.     | 4,50E+05 | 4,50E+05 | 6,75E+05 | b.t.     | b.t.     | b.t.     | b.t.     | b.t.     | b.t.     |
| P23381 | Tryptophan-tRNA ligase, cytoplasmic                               | 1,50E+06 | 2,25E+06 | 1,50E+06 | 2,02E+07 | 1,80E+07 | 1,60E+07 | 5,85E+06 | 4,88E+06 | 3,90E+06 | 5,50E+06 | 7,70E+06 | 1,30E+07 | 7,92E+07 | 8,80E+07 | 8,36E+07 | 2,40E+07 | 5,20E+07 | 5,60E+07 |
| P23396 | 40S ribosomal protein S3                                          | b.t.     | b.t.     | b.t.     | 1,68E+06 | 1,54E+06 | 1,40E+06 | b.t.     | b.t.     | b.t.     | 3,34E+06 | 4,70E+05 | 6,20E+06 | 1,53E+07 | 1,70E+07 | 1,62E+07 | 4,90E+07 | 4,41E+07 | 3,53E+07 |
| P23526 | Adenosylhomocysteinase                                            | 1,50E+06 | 1,50E+06 | 2,25E+06 | 2,40E+07 | 2,70E+07 | 1,50E+07 | b.t.     | b.t.     | b.t.     | 2,20E+06 | 2,00E+06 | 2,40E+06 | 2,88E+07 | 3,20E+07 | 3,04E+07 | 1,70E+07 | 5,90E+07 | 4,20E+07 |
| P23527 | Histone H2B type 1-O                                              | 3,40E+06 | 5,10E+06 | 3,40E+06 | b.t.     | b.t.     | 4,50E+06 | 3,75E+06 | 3,00E+06 | 1,30E+07 | 1,95E+07 | 1,30E+07 | 1,30E+07 | b.t.     | b.t.     | b.t.     | 1,90E+07 | 1,71E+07 | 1,37E+07 |
| P24752 | Acetyl-CoA acetyltransferase, mitochondrial                       | b.t.     | b.t.     | b.t.     | 3,12E+06 | 2,86E+06 | 2,60E+06 | b.t.     | b.t.     | b.t.     | 1,80E+06 | 1,80E+06 | 2,70E+06 | 3,06E+06 | 3,40E+06 | 3,23E+06 | 2,20E+06 | 2,20E+06 | 1,76E+06 |
| P25398 | 40S ribosomal protein S12                                         | b.t.     | 1,60E+07 | 2,40E+07 | 1,60E+07 | 1,62E+07 | 1,80E+07 | 1,71E+07 | 3,10E+07 | 2,79E+07 | 2,23E+07 |
| P25786 | Proteasome subunit alpha type-1                                   | b.t.     | b.t.     | b.t.     | 5,61E+06 | 8,70E+06 | 1,80E+06 | b.t.     | b.t.     | b.t.     | 1,10E+06 | 1,65E+06 | 1,10E+06 | 1,62E+07 | 1,80E+07 | 1,71E+07 | 2,60E+07 | 2,34E+07 | 1,87E+07 |
| P25788 | Proteasome subunit alpha type-3                                   | b.t.     | 5,30E+06 | 7,95E+06 | 5,30E+06 | 7,74E+06 | 8,60E+06 | 8,17E+06 | 1,60E+07 | 1,44E+07 | 1,15E+07 |
| P25789 | Proteasome subunit alpha type-4                                   | b.t.     | b.t.     | b.t.     | 7,56E+06 | 6,93E+06 | 6,30E+06 | 3,75E+06 | 3,13E+06 | 2,50E+06 | 1,10E+07 | 1,65E+07 | 1,10E+07 | 2,52E+07 | 2,80E+07 | 2,66     |          |          |          |

|        |                                                                      |          |          |          |          |          |          |          |          |          |          |          |          |          |          |          |          |          |          |
|--------|----------------------------------------------------------------------|----------|----------|----------|----------|----------|----------|----------|----------|----------|----------|----------|----------|----------|----------|----------|----------|----------|----------|
| P27695 | DNA-(apurinic or apyrimidinic site) lyase                            | 4,20E+05 | 4,20E+05 | 6,30E+05 | 8,28E+06 | 7,59E+06 | 6,90E+06 | 7,35E+06 | 6,13E+06 | 4,90E+06 | 2,20E+06 | 2,20E+06 | 3,30E+06 | 9,90E+06 | 1,10E+07 | 1,05E+07 | 6,80E+06 | 6,12E+06 | 4,90E+06 |
| P27708 | CAD protein                                                          | b.t.     | b.t.     | b.t.     | 3,30E+06 | 3,30E+06 | 4,29E+06 | b.t.     | 2,10E+06 | 6,50E+06 | 4,00E+06 |
| P28070 | Proteasome subunit beta type-4                                       | 7,50E+05 | 7,50E+05 | 1,13E+06 | 1,10E+07 | 1,01E+07 | 9,20E+06 | b.t.     | b.t.     | 1,00E+07 | 1,50E+07 | 1,00E+07 | 8,55E+06 | 9,50E+06 | 9,03E+06 | 1,00E+07 | 9,00E+06 | 7,20E+06 |          |
| P28074 | Proteasome subunit beta type-5                                       | b.t.     | b.t.     | b.t.     | b.t.     | b.t.     | b.t.     | 9,90E+05 | 8,25E+05 | 6,60E+05 | 4,10E+06 | 6,15E+06 | 4,10E+06 | b.t.     | b.t.     | b.t.     | 1,10E+07 | 9,90E+06 | 7,92E+06 |
| P28838 | Cytosol aminopeptidase                                               | b.t.     | b.t.     | b.t.     | 2,90E+06 | 4,40E+06 | 1,00E+06 | b.t.     | 8,50E+06 | 7,65E+06 | 3,50E+06 |
| P29401 | Transketolase                                                        | 3,05E+06 | 4,80E+06 | 1,30E+06 | 6,35E+07 | 6,40E+07 | 4,50E+07 | 9,30E+06 | 7,75E+06 | 6,20E+06 | 4,20E+06 | 1,30E+07 | 1,90E+07 | 9,90E+07 | 1,10E+08 | 1,05E+08 | 8,40E+07 | 5,30E+07 | 9,70E+07 |
| P29692 | Elongation factor 1-delta                                            | b.t.     | 2,09E+06 | 2,80E+05 | 3,90E+06 | b.t.     | b.t.     | b.t.     | b.t.     | 6,10E+06 | 5,49E+06 | 1,30E+06 |
| P30040 | Endoplasmic reticulum resident protein 29                            | b.t.     | b.t.     | b.t.     | 2,68E+06 | 2,70E+06 | 1,90E+06 | b.t.     | b.t.     | b.t.     | b.t.     | b.t.     | b.t.     | 1,89E+07 | 2,10E+07 | 2,00E+07 | b.t.     | b.t.     | b.t.     |
| P30043 | Flavin reductase (NADPH)                                             | b.t.     | b.t.     | b.t.     | 5,04E+06 | 4,62E+06 | 4,20E+06 | b.t.     | b.t.     | b.t.     | 4,10E+06 | 6,15E+06 | 4,10E+06 | 8,82E+06 | 9,80E+06 | 9,31E+06 | 7,80E+06 | 7,02E+06 | 5,62E+06 |
| P30044 | Peroxisiredoxin-5, mitochondrial                                     | b.t.     | b.t.     | b.t.     | 2,40E+06 | 2,20E+06 | 2,00E+06 | b.t.     | b.t.     | b.t.     | b.t.     | b.t.     | b.t.     | 9,00E+06 | 1,00E+07 | 9,50E+06 | 1,50E+07 | 1,35E+07 | 1,08E+07 |
| P30048 | Thioredoxin-dependent peroxide reductase, mitochondrial              | 3,50E+06 | 5,25E+06 | 3,50E+06 | 1,00E+07 | 6,00E+06 | 1,00E+07 | 4,35E+06 | 3,63E+06 | 2,90E+06 | 3,90E+07 | 5,85E+07 | 3,90E+07 | 3,96E+07 | 4,40E+07 | 4,18E+07 | 3,70E+07 | 3,33E+07 | 5,70E+05 |
| P30050 | 60S ribosomal protein L12                                            | b.t.     | b.t.     | b.t.     | b.t.     | b.t.     | b.t.     | 1,29E+06 | 1,08E+06 | 8,60E+05 | 2,60E+07 | 3,90E+07 | 2,60E+07 | 3,60E+07 | 4,00E+07 | 3,80E+07 | 5,10E+07 | 4,59E+07 | 3,67E+07 |
| P30084 | Enoyl-CoA hydratase, mitochondrial                                   | b.t.     | b.t.     | b.t.     | 5,28E+06 | 4,84E+06 | 4,40E+06 | 1,29E+06 | 1,08E+06 | 8,60E+05 | 2,70E+06 | 2,70E+06 | 4,05E+06 | 8,91E+06 | 9,90E+06 | 9,41E+06 | 2,10E+07 | 1,89E+07 | 4,20E+05 |
| P30101 | Protein disulfide-isomerase A3                                       | 5,00E+06 | 7,50E+06 | 5,00E+06 | 2,50E+06 | 4,50E+07 | 1,50E+07 | 9,60E+06 | 8,00E+06 | 6,40E+06 | 1,90E+07 | 1,90E+07 | 1,40E+07 | 1,08E+08 | 1,20E+08 | 1,14E+08 | 4,90E+07 | 2,70E+07 | 4,70E+07 |
| P30153 | Serine/threonine-protein phosphatase 2A 65 kDa regulatory subunit A  | b.t.     | b.t.     | b.t.     | 5,78E+06 | 8,20E+06 | 2,40E+06 | b.t.     | b.t.     | b.t.     | 6,50E+06 | 1,40E+06 | 4,20E+06 | 7,02E+06 | 7,80E+06 | 7,41E+06 | 3,10E+06 | 7,20E+06 | 1,20E+07 |
| P30838 | Aldehyde dehydrogenase, dimeric NADP-preferring                      | 2,15E+06 | 2,30E+06 | 2,00E+06 | 4,27E+07 | 6,30E+07 | 1,60E+07 | 3,90E+06 | 3,25E+06 | 2,60E+06 | 1,20E+07 | 5,80E+06 | 1,10E+07 | 1,53E+08 | 1,70E+08 | 1,62E+08 | 4,50E+07 | 3,40E+07 | 1,10E+08 |
| P31150 | Rab GDP dissociation inhibitor alpha                                 | b.t.     | b.t.     | b.t.     | 6,30E+06 | 6,30E+06 | 8,19E+06 | b.t.     | b.t.     | b.t.     | b.t.     | b.t.     | b.t.     | 7,47E+06 | 8,30E+06 | 7,89E+06 | 1,20E+06 | 1,08E+06 | 6,60E+06 |
| P31930 | Cytochrome b-c1 complex subunit 1, mitochondrial                     | b.t.     | 1,17E+07 | 1,30E+07 | 1,24E+07 | 8,88E+06 | 7,99E+06 | 7,40E+06 |
| P31939 | Bifunctional purine biosynthesis protein PURH                        | b.t.     | b.t.     | b.t.     | 3,36E+06 | 2,10E+06 | 3,30E+06 | b.t.     | b.t.     | b.t.     | 2,81E+07 | 1,10E+06 | 5,50E+07 | 2,79E+07 | 3,10E+07 | 2,95E+07 | 5,70E+07 | 1,70E+07 | 1,00E+07 |
| P31947 | 14-3-3 protein sigma                                                 | 1,60E+06 | 1,60E+06 | 2,40E+06 | b.t.     | b.t.     | b.t.     | 2,10E+06 | 1,75E+06 | 1,40E+06 | 4,10E+06 | 6,15E+06 | 4,10E+06 | 1,26E+07 | 1,40E+07 | 1,33E+07 | 2,10E+07 | 1,89E+07 | 2,80E+06 |
| P32929 | Cystathionine gamma-lyase                                            | b.t.     | b.t.     | b.t.     | 2,80E+06 | 2,80E+06 | 3,64E+06 | b.t.     | b.t.     | b.t.     | b.t.     | b.t.     | b.t.     | 4,86E+06 | 5,40E+06 | 5,13E+06 | 2,52E+06 | 2,27E+06 | 2,10E+06 |
| P33778 | Histone H2B type 1-B                                                 | 3,40E+06 | 5,10E+06 | 3,40E+06 | b.t.     | b.t.     | b.t.     | 4,50E+06 | 3,75E+06 | 3,00E+06 | 1,30E+07 | 1,95E+07 | 1,30E+07 | b.t.     | b.t.     | b.t.     | 1,90E+07 | 1,71E+07 | 1,37E+07 |
| P34897 | Serine hydroxymethyltransferase, mitochondrial                       | b.t.     | b.t.     | b.t.     | 2,88E+06 | 2,64E+06 | 2,40E+06 | 1,98E+06 | 9,60E+05 | 1,50E+06 | 2,75E+06 | 1,40E+06 | 1,40E+06 | 2,16E+07 | 2,40E+07 | 2,28E+07 | 1,30E+07 | 4,10E+06 | 1,40E+07 |
| P34931 | Heat shock 70 kDa protein 1-like                                     | 2,25E+06 | 3,10E+06 | 1,40E+06 | 2,09E+07 | 3,40E+07 | 5,50E+06 | 2,10E+06 | 1,40E+06 | 1,40E+06 | 7,30E+06 | 6,50E+06 | 3,90E+06 | 6,12E+07 | 6,80E+07 | 6,46E+07 | 1,90E+07 | 2,50E+07 | 3,80E+07 |
| P34932 | Heat shock 70 kDa protein 4                                          | b.t.     | b.t.     | b.t.     | 2,95E+06 | 2,40E+06 | 2,50E+06 | b.t.     | b.t.     | b.t.     | 1,40E+06 | 1,40E+06 | 1,40E+06 | 1,35E+07 | 1,50E+07 | 1,43E+07 | 1,10E+07 | 9,90E+06 | 2,00E+07 |
| P35268 | 60S ribosomal protein L22                                            | b.t.     | 1,62E+07 | 1,80E+07 | 1,71E+07 | 2,60E+07 | 2,34E+07 | 1,87E+07 |
| P35270 | Sepiapterin reductase                                                | b.t.     | b.t.     | b.t.     | 2,40E+06 | 2,20E+06 | 2,00E+06 | b.t.     | b.t.     | b.t.     | 1,80E+06 | 2,70E+06 | 1,80E+06 | b.t.     | b.t.     | b.t.     | b.t.     | b.t.     | b.t.     |
| P35527 | Keratin, type I cytoskeletal 9                                       | 3,80E+06 | 6,20E+06 | 1,40E+06 | 2,00E+06 | 8,60E+07 | 7,10E+06 | 1,10E+06 | 9,13E+05 | 7,30E+05 | 6,30E+06 | 2,20E+06 | 6,20E+06 | 1,35E+08 | 1,50E+08 | 1,43E+08 | 2,80E+07 | 5,60E+06 | 5,30E+07 |
| P35908 | Keratin, type II cytoskeletal 2 epidermal                            | 1,80E+06 | 1,80E+06 | 2,70E+06 | 9,60E+05 | 1,40E+07 | 3,80E+06 | 9,30E+05 | 7,75E+05 | 6,20E+05 | 2,45E+06 | 1,40E+06 | 3,50E+06 | 2,43E+07 | 2,70E+07 | 2,57E+07 | 8,30E+06 | 5,70E+06 | 1,40E+07 |
| P35998 | 26S protease regulatory subunit 7                                    | b.t.     | b.t.     | b.t.     | 1,44E+06 | 1,32E+06 | 1,20E+06 | b.t.     | 2,30E+06 | 2,07E+06 | 1,66E+06 |
| P36952 | Serpin B5                                                            | b.t.     | b.t.     | b.t.     | 6,48E+06 | 5,94E+06 | 5,40E+06 | b.t.     | b.t.     | b.t.     | 2,40E+06 | 3,60E+06 | 2,40E+06 | b.t.     | b.t.     | b.t.     | b.t.     | b.t.     | b.t.     |
| P37802 | Transgelin-2                                                         | b.t.     | b.t.     | b.t.     | 3,96E+06 | 3,63E+06 | 3,30E+06 | 3,30E+06 | 2,75E+06 | 2,20E+06 | b.t.     | b.t.     | b.t.     | 7,83E+06 | 8,70E+06 | 8,27E+06 | b.t.     | b.t.     | b.t.     |
| P37837 | Transaldolase                                                        | 3,60E+06 | 5,40E+06 | 3,60E+06 | 3,48E+06 | 3,19E+06 | 2,90E+06 | 1,95E+06 | 1,63E+06 | 1,30E+06 | 1,60E+07 | 2,40E+07 | 1,60E+07 | 1,71E+07 | 1,90E+07 | 1,81E+07 | 3,20E+07 | 2,88E+07 | 2,30E+07 |
| P38117 | Electron transfer flavoprotein subunit beta                          | b.t.     | 4,20E+06 | 6,30E+06 | 4,20E+06 | b.t.     | b.t.     | b.t.     | 1,00E+07 | 9,00E+06 | 7,20E+06 |
| P38646 | Stress-70 protein, mitochondrial                                     | b.t.     | b.t.     | b.t.     | 2,72E+07 | 3,90E+07 | 1,10E+07 | 2,21E+06 | 8,20E+05 | 1,80E+06 | 5,10E+06 | 9,90E+06 | 2,00E+07 | 7,65E+07 | 8,50E+07 | 8,08E+07 | 4,50E+07 | 1,40E+07 | 3,90E+07 |
| P39023 | 60S ribosomal protein L3                                             | b.t.     | 7,00E+06 | 1,05E+07 | 7,00E+06 | 7,11E+06 | 7,90E+06 | 7,51E+06 | 2,10E+07 | 1,89E+07 | 1,51E+07 |
| P39656 | Dolichyl-diphosphooligosaccharide-protein glycosyltransferase 48 kDa | b.t.     | b.t.     | b.t.     | 3,90E+06 | 3,90E+06 | 5,07E+06 | b.t.     | 3,20E+06 | 2,88E+06 | 5,10E+06 |
| P40227 | T-complex protein 1 subunit zeta                                     | b.t.     | b.t.     | b.t.     | 2,89E+06 | 4,10E+06 | 1,20E+06 | 2,10E+06 | 1,75E+06 | 1,40E+06 | 1,00E+06 | 1,00E+06 | 1,50E+06 | 9,90E+06 | 1,10E+07 | 1,05E+07 | 8,70E+06 | 5,10E+06 | 5,30E+06 |
| P40925 | Malate dehydrogenase, cytoplasmic                                    | b.t.     | b.t.     | b.t.     | b.t.     | b.t.     | b.t.     | 1,80E+06 | 1,50E+06 | 1,20E+06 | b.t.     | b.t.     | b.t.     | 9,90E+06 | 1,10E+07 | 1,05E+07 | 7,80E+06 | 7,02E+06 | 5,62E+06 |
| P40926 | Malate dehydrogenase, mitochondrial                                  | b.t.     | b.t.     | b.t.     | 1,27E+07 | 1,50E+06 | 1,70E+07 | 4,95E+06 | 4,13E+06 | 3,30E+06 | 2,90E+06 | 5,30E+05 | 2,70E+07 | 3,24E+07 | 3,60E+07 | 3,42E+07 | 2,20E+07 | 3,70E+06 | 1,50E+06 |
| P41091 | Eukaryotic translation initiation factor 2 subunit 3                 | b.t.     | b.t.     | b.t.     | 5,04E+06 | 3,50E+06 | 4,70E+06 | b.t.     | b.t.     | b.t.     | b.t.     | b.t.     | b.t.     | 7,74E+06 | 8,60E+06 | 8,17E+06 | 4,50E+06 | 1,30E+07 | 1,30E+07 |
| P41250 | Glycine-tRNA ligase                                                  | 1,50E+06 | 2,25E+06 | 1,50E+06 | 6,09E+06 | 9,80E+06 | 1,70E+06 | 3,30E+06 | 2,75E+06 | 2,20E+06 | 3,15E+06 | 1,90E+06 | 4,40E+06 | 1,35E+07 | 1,50E+07 | 1,43E+07 | 9,40E+06 | 1,10E+07 | 1,50E+07 |
| P41252 | Isoleucine-tRNA ligase, cytoplasmic                                  | b.t.     | b.t.     | b.t.     | 5,85E+06 | 6,10E+06 | 4,00E+06 | b.t.     | b.t.     | b.t.     | 2,45E+06 | 3,70E+06 | 2,60E+06 | 1,08E+07 | 1,20E+07 | 1,14E+07 | 4,10E+06 | 9,30E+06 | 1,30E+07 |
| P43686 | 26S protease regulatory subunit 6B                                   | b.t.     | 7,11E+06 | 7,90E+06 | 7,51E+06 | 3,70E+05 | 6,10E+06 | 4,88E+06 |
| P46108 | Adapter molecule crk                                                 | b.t.     | 4,40E+06 | 3,96E+06 | 3,17E+06 |
| P46439 | Glutathione S-transferase Mu 5                                       | b.t.     | 1,80E+07 | 1,62E+07 | 1,30E+07 |
| P46779 | 60S ribosomal protein L28                                            | b.t.     | 3,10E+06 | 4,65E+06 | 3,10E+06 | 4,05E+06 | 4,50E+06 | 4,28E+06 | 3,30E+06 | 2,97E+06 | 2,38E+06 |
| P46781 | 40S ribosomal protein S9                                             | 1,20E+06 | 1,80E+06 | 1,20E+06 | 8,28E+06 | 7,59E+06 | 6,90E+06 | 1,52E+06 | 1,30E+06 | 8,70E+05 | 1,70E+07 | 2,55E+07 | 1,70E+07 | 2,25E+07 | 2,50E+07 | 2,38E+07 | 3,00E+07 | 7,90E+06 | 1,80E+06 |
| P46940 | Ras GTPase-activating-like protein IQGAP1                            | 2,10E+06 | 2,10E+06 | 3,15E+06 | 1,56E+07 | 2,60E+07 | 3,70E+06 | 1,95E+06 | 1,63E+06 | 1,30E+06 | 3,40E+06 | 1,60E+06 | 1,00E+07 | 2,07E+07 | 2,30E+07 | 2,19E+07 | 1,20E+07 | 9,20E+06 | 2,80E+07 |
| P47756 | F-actin-capping protein subunit beta                                 | b.t.     | 2,50E+07 | 2,25E+07 | 3,20E+05 |
| P47897 | Glutamine-tRNA ligase                                                | b.t.     | b.t.     | b.t.     | 2,25E+06 | 2,40E+06 | 1,50E+06 | b.t.     | b.t.     | b.t.     | 2,30E+06 | 3,45E+06 | 2,30E+06 | b.t.     | b.t.     | b.t.     | 2,30E+06 | 2,07E+06 | 1,66E+06 |
| P49189 | 4-trimethylaminobutyraldehyde dehydrogenase                          | b.t.     | b.t.     | b.t.     | b.t.     | b.t.     | b.t.     | 1,17E+06 | 9,75E+05 | 7,80E+05 | 4,40E+05 | 4,40E+05 | 6,60E+05 | b.t.     | b.t.     | b.t.     | 3,20E+06 | 8,30E+06 | 6,64E+06 |
| P49327 | Fatty acid synthase                                                  | b.t.     | b.t.     | b.t.     | 1,40E+06 | 2,50E+07 | 6,00E+06 | 4,61E+06 | 6,10E+05 | 4,30E+06 | 4,20E+06 | 3,80E+06 | 4,60E+06 | 2,97E+07 | 3,30E+07 | 3,14E+07 | 2,20E+07 | 2,30E+07 | 2,40E+07 |
| P49411 | Elongation factor Tu, mitochondrial                                  | b.t.     | b.t.     | b.t.     | 5,76E+05 | 5,28E+05 | 4,80E+05 | b.t.     | b.t.     | b.t.     | 5,55E+06 | 1,90E+06 | 9,20E+06 | 1,35E+07 | 1,50E+07 | 1,43E+07 | 4,50E+06 | 4,05E+06 | 3,30E+06 |
| P49419 | Alpha-aminoacidip semialdehyde dehydrogenase                         | b.t.     | b.t.     | b.t.     | 4,73E+06 | 4,70E+06 | 3,40E+06 | b.t.     | b.t.     | b.t.     | b.t.     | b.t.     | b.t.     | 4,32E+06 | 4,80E+06 | 4,56E+06 | b.t.     | b.t.     | b.t.     |
| P49588 | Alanine-tRNA ligase, cytoplasmic                                     | b.t.     | 1,17E+07 | 1,30E+07 | 1,24E+07 | 3,40E+06 | 3,06E+06 | 3,30E+06 |
| P49720 | Proteasome subunit beta type-3                                       | 1,40E+06 | 1,40E+06 | 2,10E+06 | 1,02E+07 | 1,50E+07 | 3,80E+06 | 2,85E+06 | 2,38E+06 | 1,90E+06 | 1,10E+06 | 1,65E+06 | 1,10E+06 | 1,44E+07 | 1,60E+07 | 1,52E+07 | 2,00E+07 | 1,80E+07 | 7,00E+05 |
| P49721 | Proteasome subunit beta type-2                                       | 5        |          |          |          |          |          |          |          |          |          |          |          |          |          |          |          |          |          |

|        |                                                                  |          |          |          |          |          |          |            |          |          |          |          |          |          |          |          |          |          |          |          |
|--------|------------------------------------------------------------------|----------|----------|----------|----------|----------|----------|------------|----------|----------|----------|----------|----------|----------|----------|----------|----------|----------|----------|----------|
| P51148 | Ras-related protein Rab-5C                                       | b.t.     | b.t.     | b.t.     | 8,40E+05 | 7,70E+05 | 7,00E+05 | b.t.       | b.t.     | b.t.     | b.t.     | b.t.     | b.t.     | 9,90E+06 | 1,10E+07 | 1,05E+07 | 6,80E+06 | 6,12E+06 | 4,90E+06 |          |
| P51149 | Ras-related protein Rab-7a                                       | b.t.       | b.t.     | b.t.     | b.t.     | b.t.     | b.t.     | b.t.     | b.t.     | b.t.     | 7,30E+06 | 6,57E+06 | 5,26E+06 |          |
| P51572 | B-cell receptor-associated protein 31                            | b.t.       | b.t.     | b.t.     | b.t.     | b.t.     | b.t.     | b.t.     | b.t.     | b.t.     | 3,90E+06 | 3,51E+06 | 2,81E+06 |          |
| P51665 | 26S proteasome non-ATPase regulatory subunit 7                   | b.t.       | b.t.     | b.t.     | b.t.     | b.t.     | b.t.     | b.t.     | b.t.     | b.t.     | 4,60E+06 | 4,14E+06 | 3,31E+06 |          |
| P51991 | Heterogeneous nuclear ribonucleoprotein A3                       | b.t.     | b.t.     | b.t.     | 7,20E+06 | 6,60E+06 | 6,00E+06 | b.t.       | b.t.     | b.t.     | 2,40E+06 | 3,60E+06 | 2,40E+06 | 1,35E+07 | 1,50E+07 | 1,43E+07 | 1,20E+07 | 1,08E+07 | 8,64E+06 |          |
| P52209 | 6-phosphogluconate dehydrogenase, decarboxylating                | 2,29E+06 | 3,60E+06 | 9,80E+05 | 2,03E+07 | 2,10E+07 | 1,40E+07 | 4,75E+06   | 2,30E+06 | 3,60E+06 | 4,70E+06 | 1,50E+07 | 1,60E+07 | 6,57E+07 | 7,30E+07 | 6,94E+07 | 5,70E+07 | 4,90E+07 | 5,90E+07 |          |
| P52272 | Heterogeneous nuclear ribonucleoprotein M                        | b.t.       | b.t.     | b.t.     | 2,40E+06 | 3,60E+06 | 2,40E+06 | b.t.     | b.t.     | b.t.     | 1,00E+07 | 9,00E+06 | 7,20E+06 |          |
| P52789 | Hexokinase-2                                                     | b.t.     | b.t.     | b.t.     | 2,92E+06 | 2,90E+06 | 2,10E+06 | b.t.       | b.t.     | b.t.     | b.t.     | b.t.     | b.t.     | 4,14E+06 | 4,60E+06 | 4,37E+06 | 7,52E+06 | 6,50E+06 | 6,10E+06 |          |
| P52895 | Aldo-keto reductase family 1 member C2                           | b.t.       | b.t.     | b.t.     | 1,20E+06 | 1,80E+06 | 1,20E+06 | 2,88E+07 | 3,20E+07 | 3,04E+07 | 2,20E+07 | 1,98E+07 | 1,58E+07 |          |
| P53396 | ATP-citrate synthase                                             | 1,18E+06 | 1,90E+06 | 4,60E+05 | 5,56E+06 | 5,80E+06 | 3,80E+06 | 1,46E+06   | 1,21E+06 | 9,70E+05 | 2,08E+06 | 8,60E+05 | 3,30E+06 | 1,26E+07 | 1,40E+07 | 1,33E+07 | 7,50E+06 | 1,50E+07 | 1,60E+07 |          |
| P53621 | Coatomer subunit alpha                                           | b.t.     | b.t.     | b.t.     | 4,30E+06 | 4,30E+06 | 5,59E+06 | b.t.       | b.t.     | b.t.     | 1,61E+06 | 9,20E+05 | 2,30E+06 | 3,96E+06 | 4,40E+06 | 4,18E+06 | 3,40E+06 | 7,20E+06 | 5,50E+06 |          |
| P53992 | Protein transport protein Sec24C                                 | b.t.     | b.t.     | b.t.     | 1,32E+06 | 1,21E+06 | 1,10E+06 | b.t.       | b.t.     | b.t.     | b.t.     | b.t.     | b.t.     | 3,69E+06 | 4,10E+06 | 3,90E+06 | 2,52E+06 | 2,27E+06 | 2,10E+06 |          |
| P54136 | Arginine-tRNA ligase, cytoplasmic                                | b.t.     | b.t.     | b.t.     | 3,30E+06 | 3,30E+06 | 4,29E+06 | b.t.       | b.t.     | b.t.     | b.t.     | b.t.     | b.t.     | 8,19E+06 | 9,10E+06 | 8,65E+06 | 4,90E+06 | 6,90E+06 | 7,40E+06 |          |
| P54727 | UV excision repair protein RAD23 homolog B                       | b.t.       | b.t.     | b.t.     | b.t.     | b.t.     | b.t.     | 6,57E+06 | 7,30E+06 | 6,94E+06 | b.t.     | b.t.     | b.t.     |          |
| P54886 | Delta-1-pyrroline-5-carboxylate synthase                         | b.t.       | b.t.     | b.t.     | b.t.     | b.t.     | b.t.     | 1,35E+07 | 1,50E+07 | 1,43E+07 | 7,60E+06 | 6,84E+06 | 1,10E+07 |          |
| P55010 | Eukaryotic translation initiation factor 5                       | b.t.     | b.t.     | b.t.     | 2,33E+06 | 2,70E+06 | 1,40E+06 | b.t.       | b.t.     | b.t.     | b.t.     | b.t.     | b.t.     | 1,26E+07 | 1,40E+07 | 1,33E+07 | 7,90E+06 | 7,11E+06 | 5,69E+06 |          |
| P55060 | Exportin-2                                                       | b.t.     | b.t.     | b.t.     | 4,20E+06 | 4,20E+06 | 5,46E+06 | b.t.       | b.t.     | b.t.     | b.t.     | b.t.     | b.t.     | 9,90E+06 | 1,10E+07 | 1,05E+07 | 2,90E+06 | 8,00E+06 | 6,30E+06 |          |
| P55210 | Caspase-7                                                        | b.t.       | b.t.     | b.t.     | b.t.     | b.t.     | b.t.     | b.t.     | b.t.     | b.t.     | 2,40E+06 | 2,16E+06 | 1,73E+06 |          |
| P55786 | Puromycin-sensitive aminopeptidase                               | b.t.     | b.t.     | b.t.     | 6,49E+06 | 9,20E+06 | 2,70E+06 | b.t.       | b.t.     | b.t.     | 1,46E+06 | 8,10E+05 | 2,10E+06 | 1,17E+07 | 1,30E+07 | 1,24E+07 | 5,70E+06 | 9,70E+06 | 1,10E+07 |          |
| P56192 | Methionine-tRNA ligase, cytoplasmic                              | b.t.       | b.t.     | b.t.     | b.t.     | b.t.     | b.t.     | 1,26E+06 | 1,40E+06 | 1,33E+06 | 1,40E+06 | 1,26E+06 | 5,30E+06 |          |
| P56537 | Eukaryotic translation initiation factor 6                       | b.t.     | b.t.     | b.t.     | 3,99E+06 | 4,20E+06 | 2,70E+06 | b.t.       | b.t.     | b.t.     | b.t.     | b.t.     | b.t.     | 3,60E+06 | 4,00E+06 | 3,80E+06 | 1,60E+07 | 1,44E+07 | 1,15E+07 |          |
| P57053 | Histone H2B type F-S                                             | b.t.       | b.t.     | b.t.     | 2,80E+06 | 4,20E+06 | 2,80E+06 | 1,08E+07 | 1,20E+07 | 1,14E+07 | b.t.     | b.t.     | b.t.     |          |
| P59998 | Actin-related protein 2/3 complex subunit 4                      | b.t.       | b.t.     | b.t.     | b.t.     | 6,20E+06 | 9,30E+06 | 6,20E+06 | b.t.     | b.t.     | b.t.     | 1,60E+07 | 1,44E+07 | 1,15E+07 |
| P60842 | Eukaryotic initiation factor 4A-I                                | 3,20E+05 | 3,20E+05 | 4,80E+05 | 5,26E+06 | 5,90E+06 | 3,30E+06 | 1,95E+06   | 1,63E+06 | 1,30E+06 | 5,05E+06 | 3,10E+06 | 7,00E+06 | 2,61E+07 | 2,90E+07 | 2,76E+07 | 1,90E+07 | 1,70E+07 | 3,80E+07 |          |
| P60866 | 40S ribosomal protein S20                                        | b.t.       | b.t.     | b.t.     | 6,10E+06 | 9,15E+06 | 6,10E+06 | 1,08E+07 | 1,20E+07 | 1,14E+07 | b.t.     | b.t.     | b.t.     |          |
| P60891 | Ribose-phosphate pyrophosphokinase 1                             | b.t.     | b.t.     | b.t.     | b.t.     | b.t.     | b.t.     | 1,65E+06   | 1,38E+06 | 1,10E+06 | 3,11E+06 | 7,20E+05 | 5,50E+06 | 1,62E+07 | 1,80E+07 | 1,71E+07 | 1,10E+07 | 9,90E+06 | 7,92E+06 |          |
| P60900 | Proteasome subunit alpha type-6                                  | b.t.     | b.t.     | b.t.     | 1,56E+07 | 1,43E+07 | 1,30E+07 | 1,50E+06   | 1,25E+06 | 1,00E+06 | 1,60E+07 | 2,40E+07 | 1,60E+07 | 2,25E+07 | 2,50E+07 | 2,38E+07 | 1,30E+07 | 5,30E+05 | 4,24E+05 |          |
| P61077 | Ubiquitin-conjugating enzyme E2 D3                               | b.t.     | b.t.     | b.t.     | 2,04E+06 | 1,87E+06 | 1,70E+06 | b.t.       | b.t.     | b.t.     | 1,70E+06 | 2,55E+06 | 1,70E+06 | 9,90E+06 | 1,10E+07 | 1,05E+07 | 9,30E+06 | 8,37E+06 | 6,70E+06 |          |
| P61204 | ADP-ribosylation factor 3                                        | b.t.     | b.t.     | b.t.     | 6,60E+06 | 6,05E+06 | 5,50E+06 | 1,80E+06   | 1,50E+06 | 1,20E+06 | 2,10E+07 | 3,15E+07 | 2,10E+07 | 2,52E+07 | 2,80E+07 | 2,66E+07 | 4,70E+06 | 4,23E+06 | 3,38E+06 |          |
| P61604 | 10 kDa heat shock protein, mitochondrial                         | 5,60E+06 | 8,40E+06 | 5,60E+06 | b.t.     | b.t.     | b.t.     | 6,30E+06   | 5,25E+06 | 4,20E+06 | 1,67E+07 | 4,70E+05 | 3,30E+07 | 1,08E+08 | 1,20E+08 | 1,14E+08 | 1,50E+08 | 1,35E+08 | 2,00E+06 |          |
| P61970 | Nuclear transport factor 2                                       | b.t.       | b.t.     | b.t.     | 1,30E+07 | 1,95E+07 | 1,30E+07 | 1,71E+07 | 1,90E+07 | 1,81E+07 | 2,10E+07 | 1,10E+06 | 8,80E+05 |          |
| P61978 | Heterogeneous nuclear ribonucleoprotein K                        | 1,70E+06 | 1,70E+06 | 2,55E+06 | 2,16E+07 | 1,98E+07 | 1,80E+07 | 4,85E+06   | 1,10E+06 | 4,30E+06 | 1,00E+06 | 1,70E+07 | 9,30E+06 | 4,05E+07 | 4,50E+07 | 4,28E+07 | 7,90E+07 | 1,40E+06 | 1,30E+06 |          |
| P61981 | 14-3-3 protein gamma                                             | b.t.     | b.t.     | b.t.     | 7,86E+06 | 8,30E+06 | 5,30E+06 | 1,40E+06   | 1,40E+06 | 1,68E+06 | 2,10E+06 | 2,40E+06 | 1,80E+06 | 2,25E+07 | 2,50E+07 | 2,38E+07 | 3,20E+07 | 2,30E+06 | 5,10E+06 |          |
| P62081 | 40S ribosomal protein S7                                         | b.t.       | b.t.     | b.t.     | 5,90E+06 | 8,85E+06 | 5,90E+06 | b.t.     | b.t.     | b.t.     | b.t.     | 8,20E+06 | 7,38E+06 | 1,20E+06 |
| P62136 | Serine/threonine-protein phosphatase PP1-alpha catalytic subunit | b.t.     | b.t.     | b.t.     | 4,83E+06 | 2,80E+06 | 4,90E+06 | b.t.       | b.t.     | b.t.     | 1,50E+06 | 1,50E+06 | 2,25E+06 | 1,80E+07 | 2,00E+07 | 1,90E+07 | 5,60E+06 | 5,04E+06 | 4,03E+06 |          |
| P62195 | 26S protease regulatory subunit 8                                | b.t.     | b.t.     | b.t.     | 1,32E+06 | 1,21E+06 | 1,10E+06 | b.t.       | b.t.     | b.t.     | b.t.     | b.t.     | b.t.     | 7,20E+06 | 8,00E+06 | 7,60E+06 | 1,90E+06 | 5,30E+06 | 5,40E+06 |          |
| P62244 | 40S ribosomal protein S15a                                       | b.t.       | b.t.     | b.t.     | 3,10E+07 | 4,65E+07 | 3,10E+07 | 2,25E+07 | 2,50E+07 | 2,38E+07 | 2,00E+07 | 6,50E+06 | 5,20E+06 |          |
| P62258 | 14-3-3 protein epsilon                                           | 3,65E+06 | 5,10E+06 | 2,20E+06 | 1,07E+07 | 9,90E+06 | 8,20E+06 | 1,06E+07   | 6,10E+06 | 7,50E+06 | 6,00E+06 | 4,90E+06 | 7,10E+06 | 3,96E+07 | 4,40E+07 | 4,18E+07 | 8,50E+07 | 2,70E+06 | 2,20E+06 |          |
| P62263 | 40S ribosomal protein S14                                        | b.t.       | b.t.     | b.t.     | b.t.     | b.t.     | b.t.     | 4,77E+06 | 5,30E+06 | 5,04E+06 | b.t.     | b.t.     | b.t.     |          |
| P62269 | 40S ribosomal protein S18                                        | b.t.       | b.t.     | b.t.     | 8,60E+06 | 1,29E+07 | 8,60E+06 | 2,34E+07 | 2,60E+07 | 2,47E+07 | 2,80E+07 | 2,52E+07 | 2,40E+06 |          |
| P62277 | 40S ribosomal protein S13                                        | 3,40E+05 | 3,40E+05 | 5,10E+05 | 2,74E+07 | 2,40E+07 | 2,20E+07 | 3,15E+06   | 2,63E+06 | 2,10E+06 | 2,70E+07 | 4,05E+07 | 2,70E+07 | 5,58E+07 | 6,20E+07 | 5,89E+07 | 3,60E+07 | 7,40E+06 | 5,92E+06 |          |
| P62314 | Small nuclear ribonucleoprotein Sm D1                            | 2,90E+06 | 2,90E+06 | 4,35E+06 | 1,14E+07 | 8,70E+06 | 1,00E+07 | 7,55E+06   | 1,10E+06 | 7,00E+06 | 6,10E+06 | 9,15E+06 | 6,10E+06 | 1,44E+07 | 1,60E+07 | 1,52E+07 | 3,66E+06 | 2,70E+06 | 3,30E+06 |          |
| P62424 | 60S ribosomal protein L7a                                        | b.t.       | b.t.     | b.t.     | 9,80E+06 | 1,47E+07 | 9,80E+06 | 1,08E+07 | 1,20E+07 | 1,14E+07 | 2,00E+07 | 1,80E+07 | 1,44E+07 |          |
| P62495 | Eukaryotic peptide chain release factor subunit 1                | b.t.       | b.t.     | b.t.     | b.t.     | b.t.     | b.t.     | 5,22E+06 | 5,80E+06 | 5,51E+06 | 8,10E+06 | 7,29E+06 | 5,83E+06 |          |
| P62701 | 40S ribosomal protein S4                                         | b.t.     | b.t.     | b.t.     | 3,12E+06 | 2,86E+06 | 2,60E+06 | b.t.       | b.t.     | b.t.     | 2,95E+06 | 2,50E+06 | 3,40E+06 | 2,52E+07 | 2,80E+07 | 2,66E+07 | 3,90E+07 | 3,51E+07 | 2,81E+07 |          |
| P62807 | Histone H2B type 1-C/E/F/G/I                                     | b.t.       | b.t.     | b.t.     | 2,80E+06 | 4,20E+06 | 2,80E+06 | 1,08E+07 | 1,20E+07 | 1,14E+07 | b.t.     | b.t.     | b.t.     |          |
| P62834 | Ras-related protein Rap-1A                                       | b.t.       | b.t.     | b.t.     | b.t.     | b.t.     | b.t.     | 5,67E+06 | 6,30E+06 | 5,99E+06 | 3,00E+06 | 2,70E+06 | 2,16E+06 |          |
| P62847 | 40S ribosomal protein S24                                        | b.t.     | b.t.     | b.t.     | b.t.     | b.t.     | b.t.     | 1,95E+06   | 1,63E+06 | 1,30E+06 | b.t.     | b.t.     | b.t.     | 1,44E+07 | 1,60E+07 | 1,52E+07 | 7,80E+06 | 7,02E+06 | 1,20E+06 |          |
| P62851 | 40S ribosomal protein S25                                        | b.t.       | b.t.     | b.t.     | 2,20E+07 | 3,30E+07 | 2,20E+07 | 1,89E+07 | 2,10E+07 | 2,00E+07 | 3,10E+07 | 2,79E+07 | 2,23E+07 |          |
| P62854 | 40S ribosomal protein S26                                        | b.t.       | b.t.     | b.t.     | 6,50E+06 | 9,75E+06 | 6,50E+06 | b.t.     | b.t.     | b.t.     | 8,00E+06 | 7,20E+06 | 5,76E+06 |          |
| P62888 | 60S ribosomal protein L30                                        | b.t.     | b.t.     | b.t.     | 8,52E+07 | 7,81E+07 | 7,10E+07 | 1,60E+07   | 2,40E+07 | 1,60E+07 | b.t.     | b.t.     | b.t.     | 1,08E+06 | 1,20E+06 | 1,14E+06 | 1,20E+06 | 1,08E+06 | 8,64E+05 |          |
| P62906 | 60S ribosomal protein L10a                                       | b.t.       | b.t.     | b.t.     | 6,10E+06 | 9,15E+06 | 6,10E+06 | 8,55E+06 | 9,50E+06 | 9,03E+06 | 1,70E+07 | 1,53E+07 | 1,22E+07 |          |
| P62913 | 60S ribosomal protein L11                                        | b.t.       | b.t.     | b.t.     | 2,20E+06 | 3,30E+06 | 2,20E+06 | 3,60E+06 | 4,00E+06 | 3,80E+06 | 2,10E+06 | 1,89E+06 | 1,51E+06 |          |
| P62917 | 60S ribosomal protein L8                                         | b.t.       | b.t.     | b.t.     | 2,00E+06 | 3,00E+06 | 2,00E+06 | 4,77E+06 | 5,30E+06 | 5,04E+06 | 1,00E+07 | 9,00E+06 | 7,20E+06 |          |
| P62937 | Peptidyl-prolyl cis-trans isomerase A                            | 1,30E+06 | 1,30E+06 | 1,95E+06 | 2,22E+07 | 1,50E+07 | 2,10E+07 | 3,02E+07   | 8,30E+06 | 2,60E+07 | 7,20E+06 | 3,90E+06 | 1,20E+07 | 1,98E+08 | 2,20E+08 | 2,09E+08 | 3,40E+08 | 3,06E+08 | 6,00E+06 |          |
| P62979 | Ubiquitin-40S ribosomal protein S27a                             | 1,23E+06 | 7,60E+05 | 1,70E+06 | 2,80E+06 | 6,60E+06 | 2,80E+07 | 1,10E+07   | 9,13E+06 | 7,30E+06 | 3,00E+06 | 2,60E+06 | 5,90E+07 | 1,08E+08 | 1,20E+08 | 1,14E+08 | 1,30E+08 | 4,20E+07 | 1,80E+07 |          |
| P62995 | Transformer-2 protein homolog beta                               | b.t.       | b.t.     | b.t.     | b.t.     | b.t.     | b.t.     | b.t.     | b.t.     | b.t.     | 9,00E+06 | 8,10E+06 | 6,48E+06 |          |
| P63104 | 14-3-3 protein zeta/delta                                        | 2,60E+06 | 2,60E+06 | 3,90E+06 | 1,73E+07 | 2,40E+07 | 7,60E+06 | 5,80E+06   | 1,60E+06 | 5,00E+06 | 8,90E+06 | 1,40E+07 | 3,80E+06 | 4,77E+07 | 5,30E+07 | 5,04E+07 | 5,70E+07 | 5,13E+07 | 1,60E+06 |          |
| P63162 | Small nuclear ribonucleoprotein-associated protein N             | b.t.     | b.t.     | b.t.     | 6,60E+06 | 6,05E+06 | 5,50E+06 | b.t.       | b.t.     | b.t.     | 7,90E+06 | 1,19E+07 | 7,90E+06 | 1,35E+07 | 1,50E+07 | 1,43E+07 | 2,50E+07 | 1,20E+06 | 1,20E+06 |          |
| P63261 | Actin, cytoplasmic 2                                             | 6,20E+06 | 4,80E+06 | 7,60E+06 | 8,20E+06 | 2,60E+08 | 3,40E+07 | 1,60E+07</ |          |          |          |          |          |          |          |          |          |          |          |          |

[illegible]

|        |                                                                    |          |          |          |          |          |          |          |          |          |          |          |          |          |          |          |            |          |          |
|--------|--------------------------------------------------------------------|----------|----------|----------|----------|----------|----------|----------|----------|----------|----------|----------|----------|----------|----------|----------|------------|----------|----------|
| Q16881 | Thioredoxin reductase 1a                                           | 1,70E+06 | 1,70E+06 | 2,55E+06 | 3,20E+07 | 5,30E+07 | 7,80E+06 | 1,65E+06 | 1,38E+06 | 1,10E+06 | 2,60E+06 | 3,70E+06 | 8,00E+06 | 7,29E+07 | 8,10E+07 | 7,70E+07 | 2,60E+07   | 3,00E+07 | 4,40E+07 |
| Q1XBU6 | Aging-associated protein 14b                                       | b.t.     | 1,20E+06 | 1,20E+06 | 1,80E+06 | 5,49E+06 | 6,10E+06 | 5,80E+06 | 4,60E+06   | 4,14E+06 | 3,31E+06 |
| Q24IU4 | Eukaryotic translation initiation factor 3 subunit A               | b.t.     | b.t.     | b.t.     | 1,10E+06 | 1,01E+06 | 9,20E+05 | b.t.     | 4,30E+06   | 4,90E+06 | 3,92E+06 |
| Q2M1K9 | Zinc finger protein 423                                            | 1,18E+06 | 1,90E+06 | 4,60E+05 | 5,56E+06 | 5,80E+06 | 3,80E+06 | 1,46E+06 | 1,21E+06 | 9,70E+05 | 2,08E+06 | 8,60E+05 | 3,30E+06 | 1,26E+07 | 1,40E+07 | 1,33E+07 | 7,50E+06   | 1,50E+07 | 1,60E+07 |
| Q2NKY5 | TUBB6 protein                                                      | b.t.     | 5,50E+05 | 5,50E+05 | 8,25E+05 | 9,90E+06 | 1,10E+07 | 1,05E+07 | 1,60E+06   | 1,44E+06 | 1,15E+06 |
| Q2TNB3 | Cell migration-inducing protein 22                                 | b.t.     | b.t.     | b.t.     | 6,84E+05 | 6,27E+05 | 5,70E+05 | b.t.     | b.t.     | b.t.     | 2,60E+06 | 1,70E+06 | 3,50E+06 | 5,22E+06 | 5,80E+06 | 5,51E+06 | 9,30E+06   | 8,37E+06 | 6,70E+06 |
| Q2XPP3 | Type II 3a-hydroxysteroid dehydrogenase                            | b.t.     | b.t.     | b.t.     | 6,96E+06 | 6,38E+06 | 5,80E+06 | 2,25E+06 | 1,30E+06 | 1,60E+06 | 3,10E+06 | 4,65E+06 | 3,10E+06 | 2,16E+07 | 2,40E+07 | 2,28E+07 | 3,10E+07   | 2,79E+07 | 1,40E+06 |
| Q32Q12 | Nucleoside diphosphate kinase                                      | b.t.     | b.t.     | b.t.     | 1,44E+07 | 1,32E+07 | 1,20E+07 | 4,05E+06 | 3,38E+06 | 2,70E+06 | 2,20E+06 | 3,30E+06 | 2,20E+06 | 2,07E+07 | 2,30E+07 | 2,19E+07 | 1,20E+07   | 1,08E+07 | 5,20E+05 |
| Q32Q75 | Eukaryotic translation initiation factor 4E                        | b.t.     | 4,23E+06 | 4,70E+06 | 4,47E+06 | 1,20E+07   | 1,08E+07 | 8,64E+06 |
| Q3B7A3 | SEPT7 protein                                                      | b.t.     | 9,00E+06 | 1,00E+07 | 9,50E+06 | b.t.       | b.t.     | b.t.     |
| Q3B7A7 | Phosphoribosylglycinamide formyltransferase/phosphoribosylglycinar | b.t.     | b.t.     | b.t.     | 2,80E+06 | 2,80E+06 | 3,64E+06 | b.t.     | b.t.     | b.t.     | 5,90E+05 | 8,85E+05 | 5,90E+05 | 2,79E+06 | 3,10E+06 | 2,95E+06 | 1,30E+06   | 5,60E+06 | 4,40E+06 |
| Q3MIH3 | Ubiquitin A-52 residue ribosomal protein fusion product 1          | 1,23E+06 | 7,60E+05 | 1,70E+06 | 2,80E+06 | 6,60E+06 | 2,80E+07 | 1,10E+07 | 9,13E+06 | 7,30E+06 | 3,00E+06 | 2,60E+06 | 5,90E+07 | 1,08E+08 | 1,20E+08 | 1,14E+08 | 1,30E+08   | 4,20E+07 | 1,80E+07 |
| Q4VB24 | Histone cluster 1. H1e                                             | b.t.     | 1,40E+07 | 2,10E+07 | 1,40E+07 | 3,33E+07 | 3,70E+07 | 3,52E+07 | 3,10E+07   | 2,79E+07 | 2,23E+07 |
| Q4W4Y1 | Dopamine receptor interacting protein 4                            | b.t.     | 1,30E+06   | 1,17E+06 | 9,36E+05 |
| Q53F20 | Acidic leucine-rich nuclear phosphoprotein 32 family, member D     | b.t.     | b.t.     | b.t.     | 5,52E+06 | 4,60E+06 | 4,60E+06 | b.t.     | b.t.     | b.t.     | 4,90E+06 | 7,35E+06 | 4,90E+06 | b.t.     | b.t.     | b.t.     | 9,30E+06   | 1,10E+06 | 8,80E+05 |
| Q53F35 | Acidic leucine-rich nuclear phosphoprotein 32 family, member C     | b.t.     | 2,70E+06 | 4,05E+06 | 2,70E+06 | 9,90E+06 | 1,10E+07 | 1,05E+07 | 1,60E+07   | 1,44E+07 | 1,15E+07 |
| Q53F48 | Heterogeneous nuclear ribonucleoprotein H3                         | b.t.     | b.t.     | b.t.     | b.t.     | b.t.     | b.t.     | 1,23E+06 | 1,03E+06 | 8,20E+05 | b.t.     | b.t.     | b.t.     | 3,87E+06 | 4,30E+06 | 4,09E+06 | 5,40E+06   | 4,86E+06 | 3,89E+06 |
| Q53F64 | Heterogeneous nuclear ribonucleoprotein AB                         | 2,90E+06 | 2,90E+06 | 4,35E+06 | 7,16E+06 | 6,20E+06 | 5,80E+06 | 5,10E+06 | 4,25E+06 | 3,40E+06 | 1,80E+06 | 2,70E+06 | 1,80E+06 | 2,34E+07 | 2,60E+07 | 2,47E+07 | 1,80E+07   | 1,62E+07 | 2,90E+06 |
| Q53FC7 | Heat shock 70kDa protein 6 (HSP70B')                               | 3,40E+06 | 5,00E+06 | 1,80E+06 | 8,39E+06 | 7,40E+06 | 6,70E+06 | 1,73E+06 | 8,50E+05 | 1,30E+06 | 8,00E+06 | 8,50E+06 | 1,40E+07 | 4,59E+07 | 5,10E+07 | 4,85E+07 | 2,70E+07   | 3,80E+07 | 3,00E+07 |
| Q53FN7 | BZW1 protein variant                                               | b.t.     | b.t.     | b.t.     | 2,88E+06 | 2,64E+06 | 2,40E+06 | b.t.     | b.t.     | b.t.     | 1,00E+06 | 1,00E+06 | 1,50E+06 | 4,86E+06 | 5,40E+06 | 5,13E+06 | 7,60E+06   | 7,80E+06 | 3,10E+06 |
| Q53FR4 | Vacuolar protein sorting 35 variant                                | b.t.     | b.t.     | b.t.     | 4,33E+06 | 6,00E+06 | 1,90E+06 | b.t.     | b.t.     | b.t.     | b.t.     | b.t.     | b.t.     | 9,90E+06 | 1,10E+07 | 1,05E+07 | 4,30E+06   | 6,60E+06 | 8,00E+06 |
| Q53FT8 | Proteasome subunit beta type-6                                     | 3,30E+05 | 3,30E+05 | 4,95E+05 | 2,04E+06 | 1,87E+06 | 1,70E+06 | b.t.     | b.t.     | b.t.     | 3,60E+06 | 5,40E+06 | 3,60E+06 | 8,46E+06 | 9,40E+06 | 8,93E+06 | 9,00E+06   | 8,10E+06 | 5,10E+05 |
| Q53FW2 | Phosphoribosyl pyrophosphate synthetase 1                          | b.t.     | b.t.     | b.t.     | b.t.     | b.t.     | b.t.     | 1,65E+06 | 1,38E+06 | 1,10E+06 | 3,11E+06 | 7,20E+05 | 5,50E+06 | 1,62E+07 | 1,80E+07 | 1,71E+07 | 1,10E+07   | 9,90E+06 | 7,92E+06 |
| Q53G35 | Phosphoglycerate mutase 1                                          | 6,50E+05 | 6,50E+05 | 9,75E+05 | 1,39E+07 | 1,10E+07 | 1,20E+07 | 5,56E+06 | 9,20E+05 | 5,10E+06 | 1,15E+07 | 1,90E+06 | 2,10E+07 | 4,05E+07 | 4,50E+07 | 4,28E+07 | 6,60E+07   | 3,80E+06 | 2,90E+06 |
| Q53G64 | Anterior gradient 2                                                | b.t.     | b.t.     | b.t.     | 1,13E+07 | 1,03E+07 | 9,40E+06 | 2,31E+07 | 2,20E+06 | 2,20E+07 | 5,30E+06 | 9,00E+06 | 7,40E+06 | 8,10E+07 | 9,00E+07 | 8,55E+07 | 1,60E+08   | 3,30E+06 | 2,80E+06 |
| Q53G74 | Ribosomal protein L4 variant                                       | b.t.     | 4,59E+07 | 5,10E+07 | 4,85E+07 | 4,90E+07   | 4,41E+07 | 3,53E+07 |
| Q53G99 | Beta actin                                                         | 6,20E+06 | 4,80E+06 | 7,60E+06 | 8,20E+06 | 2,60E+08 | 3,40E+07 | 1,60E+07 | 1,20E+07 | 1,00E+07 | 5,80E+07 | 1,30E+08 | 2,20E+07 | 7,20E+08 | 8,00E+08 | 7,60E+08 | 3,80E+08   | 6,20E+06 | 6,00E+08 |
| Q53GA7 | Tubulin alpha 6                                                    | b.t.     | b.t.     | b.t.     | 3,33E+06 | 2,60E+06 | 2,90E+06 | 4,50E+06 | 3,75E+06 | 3,00E+06 | 7,70E+06 | 4,40E+06 | 1,10E+07 | 5,31E+07 | 5,90E+07 | 5,61E+07 | 3,40E+07   | 1,90E+05 | 1,40E+07 |
| Q53GN4 | WD repeat domain 1, isoform                                        | b.t.     | 4,32E+06 | 4,80E+06 | 4,56E+06 | 3,30E+06   | 3,70E+06 | 4,60E+06 |
| Q53GN6 | Proteasome 26S non-ATPase subunit 13 isoform 1                     | b.t.     | b.t.     | b.t.     | 4,09E+06 | 3,00E+06 | 3,70E+06 | b.t.     | b.t.     | b.t.     | b.t.     | b.t.     | b.t.     | 4,23E+06 | 4,70E+06 | 4,47E+06 | 4,10E+06   | 1,20E+07 | 4,70E+06 |
| Q53GX7 | Threonyl-tRNA synthetase                                           | b.t.     | b.t.     | b.t.     | 4,52E+06 | 5,40E+06 | 2,60E+06 | b.t.     | b.t.     | b.t.     | 4,70E+05 | 4,70E+05 | 7,05E+05 | 7,74E+06 | 8,60E+06 | 8,17E+06 | 4,10E+06   | 6,70E+06 | 6,30E+06 |
| Q53H34 | Ribosomal protein L13a                                             | b.t.     | 1,80E+06 | 2,70E+06 | 1,80E+06 | 3,06E+06 | 3,40E+06 | 3,23E+06 | 4,00E+06   | 3,60E+06 | 2,88E+06 |
| Q53HA4 | Seryl-tRNA synthetase                                              | b.t.     | 1,50E+06 | 2,25E+06 | 1,50E+06 | b.t.     | b.t.     | b.t.     | 1,30E+06   | 1,20E+06 | 4,70E+06 |
| Q53HB3 | Proteasome 26S ATPase subunit 1                                    | b.t.     | b.t.     | b.t.     | 4,40E+06 | 5,30E+06 | 2,50E+06 | b.t.     | b.t.     | b.t.     | 1,30E+06 | 1,30E+06 | 1,95E+06 | 6,75E+06 | 7,50E+06 | 7,13E+06 | 3,00E+06   | 1,00E+07 | 7,70E+06 |
| Q53HD3 | Ribosomal protein L18a                                             | b.t.     | 5,90E+06 | 8,85E+06 | 5,90E+06 | 4,41E+06 | 4,90E+06 | 4,66E+06 | 8,30E+06   | 7,47E+06 | 5,98E+06 |
| Q53HE7 | Small nuclear ribonucleoprotein polypeptide N                      | b.t.     | b.t.     | b.t.     | 6,60E+06 | 6,05E+06 | 5,50E+06 | b.t.     | b.t.     | b.t.     | 7,90E+06 | 1,19E+07 | 7,90E+06 | 1,35E+07 | 1,50E+07 | 1,43E+07 | 2,50E+07   | 1,20E+06 | 1,20E+06 |
| Q53HR2 | Acyl-Coenzyme A dehydrogenase                                      | b.t.     | b.t.     | b.t.     | 2,70E+06 | 2,70E+06 | 3,51E+06 | b.t.     | b.t.     | b.t.     | b.t.     | b.t.     | b.t.     | 6,03E+06 | 6,70E+06 | 6,37E+06 | 4,80E+06   | 4,32E+06 | 4,80E+06 |
| Q53HS0 | Glutaminyl-tRNA synthetase variant                                 | b.t.     | b.t.     | b.t.     | 2,25E+06 | 2,40E+06 | 1,50E+06 | b.t.     | b.t.     | b.t.     | 2,30E+06 | 3,45E+06 | 2,30E+06 | b.t.     | b.t.     | b.t.     | 2,30E+06   | 2,07E+06 | 1,66E+06 |
| Q53HU0 | Chaperonin containing TCP1a                                        | b.t.     | b.t.     | b.t.     | 1,32E+06 | 1,21E+06 | 1,10E+06 | b.t.     | b.t.     | b.t.     | 9,20E+05 | 9,20E+05 | 1,38E+06 | 3,60E+06 | 4,00E+06 | 3,80E+06 | 8,70E+06   | 7,83E+06 | 5,30E+06 |
| Q53HV1 | Ribosomal protein S4                                               | b.t.     | b.t.     | b.t.     | 3,12E+06 | 2,86E+06 | 2,60E+06 | b.t.     | b.t.     | b.t.     | 2,95E+06 | 2,50E+06 | 3,40E+06 | 2,52E+07 | 2,80E+07 | 2,66E+07 | 3,90E+07   | 3,51E+07 | 2,81E+07 |
| Q53HV2 | Chaperonin containing TCP1b                                        | b.t.     | b.t.     | b.t.     | 3,00E+06 | 2,75E+06 | 2,50E+06 | b.t.     | 6,40E+06   | 5,50E+06 | 1,10E+07 |
| Q53Y51 | D-dopachrome tautomerase                                           | b.t.     | b.t.     | b.t.     | 7,20E+06 | 6,60E+06 | 6,00E+06 | 3,00E+06 | 2,50E+06 | 2,00E+06 | 1,70E+06 | 2,55E+06 | 1,70E+06 | b.t.     | b.t.     | b.t.     | 3,50E+06   | 3,15E+06 | 2,52E+06 |
| Q562R1 | Beta-actin-like protein 2                                          | 2,58E+06 | 7,50E+05 | 4,40E+06 | 1,56E+07 | 1,43E+07 | 1,30E+07 | b.t.     | b.t.     | b.t.     | 2,10E+06 | 2,10E+06 | 3,15E+06 | b.t.     | b.t.     | b.t.     | 2,88E+07   | 2,59E+07 | 2,40E+07 |
| Q567R6 | Single-stranded DNA-binding protein                                | b.t.     | b.t.     | b.t.     | 6,60E+06 | 6,05E+06 | 5,50E+06 | b.t.     | b.t.     | b.t.     | 6,30E+06 | 9,45E+06 | 6,30E+06 | 1,80E+07 | 2,00E+07 | 1,90E+07 | 1,70E+07   | 1,53E+07 | 1,22E+07 |
| Q59EF6 | Calpain 2, large [catalytic] subunit                               | b.t.     | b.t.     | b.t.     | 2,64E+06 | 2,42E+06 | 2,20E+06 | b.t.     | b.t.     | b.t.     | b.t.     | b.t.     | b.t.     | 5,13E+06 | 5,70E+06 | 5,42E+06 | 3,20E+06   | 2,88E+06 | 3,90E+06 |
| Q59EG8 | Proteasome 26S non-ATPase subunit 2                                | b.t.     | b.t.     | b.t.     | 2,77E+06 | 3,30E+06 | 1,60E+06 | b.t.     | b.t.     | b.t.     | b.t.     | b.t.     | b.t.     | 4,95E+06 | 5,50E+06 | 5,23E+06 | 4,10E+06   | 3,69E+06 | 6,30E+06 |
| Q59EI4 | Copine I variant                                                   | b.t.     | 1,40E+06   | 1,26E+06 | 1,30E+06 |
| Q59EJ5 | Glutathione S-transferase M3                                       | 2,20E+06 | 2,20E+06 | 3,30E+06 | 3,96E+06 | 3,63E+06 | 3,30E+06 | 1,80E+06 | 1,50E+06 | 1,20E+06 | 8,40E+05 | 8,40E+05 | 1,26E+06 | 4,32E+06 | 4,80E+06 | 4,56E+06 | 6,00E+06   | 5,40E+06 | 1,10E+06 |
| Q59ET0 | Glucan                                                             | b.t.     | 3,40E+06   | 3,40E+06 | 2,72E+06 |
| Q59ET3 | Chaperonin containing TCP1, subunit 6A                             | b.t.     | b.t.     | b.t.     | 2,89E+06 | 4,10E+06 | 1,20E+06 | 2,10E+06 | 1,75E+06 | 1,40E+06 | 1,00E+06 | 1,00E+06 | 1,50E+06 | 9,90E+06 | 1,10E+07 | 1,05E+07 | 8,70E+06   | 5,10E+06 | 5,30E+06 |
| Q59F66 | DEAD box polypeptide 17 isoform p82                                | b.t.     | 1,90E+06   | 4,80E+06 | 3,90E+06 |
| Q59FF0 | EBNA-2 co-activator                                                | b.t.     | 5,10E+05 | 5,10E+05 | 7,65E+05 | 7,47E+06 | 8,30E+06 | 7,89E+06 | 6,40E+06   | 1,10E+07 | 4,80E+06 |
| Q59FI4 | Importin 4                                                         | b.t.     | b.t.     | b.t.     | 3,20E+06 | 3,20E+06 | 4,16E+06 | b.t.     | 2,20E+06   | 1,98E+06 | 1,20E+06 |
| Q59FR8 | Galectin-1a                                                        | 1,10E+06 | 1,10E+06 | 1,65E+06 | 1,12E+07 | 1,10E+07 | 8,20E+06 | 6,75E+06 | 5,63E+06 | 4,50E+06 | 4,00E+07 | 6,00E+07 | 4,00E+07 | 1,53E+08 | 1,70E+08 | 1,62E+08 | 1,50E+08   | 7,40E+06 | 5,92E+06 |
| Q59G24 | Activated RNA polymerase II transcription cofactor 4               | b.t.     | b.t.     | b.t.     | 1,68E+06 | 1,54E+06 | 1,40E+06 | 1,95E+06 | 1,63E+06 | 1,30E+06 | 7,40E+06 | 1,11E+07 | 7,40E+06 | 1,71E+07 | 1,90E+07 | 1,81E+07 | 1,70E+07   | 1,53E+07 | 1,22E+07 |
| Q59G75 | Isoleucyl-tRNA synthetase, cytoplasmic variant                     | b.t.     | b.t.     | b.t.     | 5,85E+06 | 6,10E+06 | 4,00E+06 | b.t.     | b.t.     | b.t.     | 2,40E+06 | 3,70E+06 | 2,60E+06 | 9,90E+06 | 1,10E+07 | 1,05E+07 | 1,40E+06   | 9,30E+06 | 1,30E+07 |
| Q59GA1 | Splicing factor, arginine/serine-rich 10                           | b.t.     | 9,00E+06   | 8,10E+06 | 6,48E+06 |
| Q59GB4 | Dihydropyrimidinase-like 2                                         | b.t.     | 2,35E+06 | 1,10E+06 | 3,60E+06 | 1,17E+07 | 1,30E+07 | 1,24E+07 | 5,30E+06</ |          |          |

|        |                                                                      |          |          |          |          |          |          |          |          |          |          |          |          |          |          |          |          |          |          |          |
|--------|----------------------------------------------------------------------|----------|----------|----------|----------|----------|----------|----------|----------|----------|----------|----------|----------|----------|----------|----------|----------|----------|----------|----------|
| Q59GY3 | Arginine/serine-rich splicing factor 6 variant                       | b.t.     | 1,08E+07 | 1,20E+07 | 1,14E+07 | 5,40E+06 | 4,86E+06 | 3,89E+06 |
| Q59H77 | T-complex protein 1 subunit gamma                                    | b.t.     | b.t.     | b.t.     | 6,48E+06 | 5,94E+06 | 5,40E+06 | b.t.     | b.t.     | b.t.     | 1,46E+06 | 6,20E+05 | 2,30E+06 | 1,17E+07 | 1,30E+07 | 1,24E+07 | 6,90E+06 | 4,50E+06 | 1,20E+07 |          |
| Q59HH3 | Phosphoribosylglycinamide formyltransferase/phosphoribosylglycinar   | b.t.     | b.t.     | b.t.     | 2,80E+06 | 2,80E+06 | 3,64E+06 | b.t.     | b.t.     | b.t.     | 5,90E+05 | 8,85E+05 | 5,90E+05 | 2,79E+06 | 3,10E+06 | 2,95E+06 | 1,30E+06 | 5,60E+06 | 4,40E+06 |          |
| Q5CAQ5 | Tumor rejection antigen (Gp96) 1                                     | 2,40E+06 | 2,40E+06 | 3,60E+06 | 2,00E+06 | 9,40E+06 | 2,20E+07 | 3,15E+06 | 1,70E+06 | 2,30E+06 | 6,00E+06 | 1,30E+07 | 1,00E+07 | 1,17E+08 | 1,30E+08 | 1,24E+08 | 6,70E+07 | 9,60E+07 | 1,10E+08 |          |
| Q5JP53 | Tubulin beta chain                                                   | b.t.     | 4,30E+06 | 3,70E+06 | 4,90E+06 | 3,33E+07 | 3,70E+07 | 3,52E+07 | 2,80E+07 | 2,52E+07 | 9,10E+05 |          |
| Q5JR94 | 40S ribosomal protein S8                                             | b.t.     | 5,60E+05 | 5,60E+05 | 8,40E+05 | b.t.     | b.t.     | b.t.     | b.t.     | b.t.     | b.t.     |          |
| Q5JTH9 | RRP12-like protein                                                   | b.t.     | 1,90E+06 | 6,40E+05 | 5,12E+05 |          |
| Q5JYR7 | Dolichyl-diphosphooligosaccharide-protein glycosyltransferase subuni | b.t.     | b.t.     | b.t.     | 2,52E+06 | 2,31E+06 | 2,10E+06 | b.t.     | 3,10E+06 | 2,79E+06 | 1,50E+06 |          |
| Q5M7Z5 | GRHPR protein                                                        | b.t.     | 1,90E+06 | 2,85E+06 | 1,90E+06 | 1,53E+07 | 1,70E+07 | 1,62E+07 | b.t.     | b.t.     | b.t.     |          |
| Q5M7Z9 | TARS protein                                                         | b.t.     | b.t.     | b.t.     | 4,52E+06 | 5,40E+06 | 2,60E+06 | b.t.     | b.t.     | b.t.     | 4,70E+05 | 4,70E+05 | 7,05E+05 | 7,74E+06 | 8,60E+06 | 8,17E+06 | 4,10E+06 | 6,70E+06 | 6,30E+06 |          |
| Q5PY61 | Polyubiquitin-C                                                      | 1,23E+06 | 7,60E+05 | 1,70E+06 | 2,80E+06 | 6,60E+06 | 2,80E+07 | 1,10E+07 | 9,13E+06 | 7,30E+06 | 3,00E+06 | 2,60E+06 | 5,90E+07 | 1,08E+08 | 1,20E+08 | 1,14E+08 | 1,30E+08 | 4,20E+07 | 1,80E+07 |          |
| Q5QNW6 | Histone H2B type 2-F                                                 | b.t.     | 2,80E+06 | 4,20E+06 | 2,80E+06 | 1,08E+07 | 1,20E+07 | 1,14E+07 | b.t.     | b.t.     | b.t.     |          |
| Q5R210 | Carbamoylphosphate synthetase I                                      | 3,35E+06 | 5,00E+06 | 1,70E+06 | 4,64E+07 | 5,50E+07 | 2,70E+07 | 1,92E+06 | 8,40E+05 | 1,50E+06 | 5,00E+06 | 4,40E+06 | 1,90E+07 | 7,38E+07 | 8,20E+07 | 7,79E+07 | 2,70E+07 | 2,10E+07 | 4,90E+07 |          |
| Q5RKT7 | Ribosomal protein S27a                                               | 1,23E+06 | 7,60E+05 | 1,70E+06 | 2,80E+06 | 6,60E+06 | 2,80E+07 | 1,10E+07 | 9,13E+06 | 7,30E+06 | 3,00E+06 | 2,60E+06 | 5,90E+07 | 1,08E+08 | 1,20E+08 | 1,14E+08 | 1,30E+08 | 4,20E+07 | 1,80E+07 |          |
| Q5SU16 | Beta 5-tubulin                                                       | b.t.     | 4,30E+06 | 3,70E+06 | 4,90E+06 | 3,33E+07 | 3,70E+07 | 3,52E+07 | 2,80E+07 | 2,52E+07 | 9,10E+05 |          |
| Q5T5C7 | Serine-tRNA ligase, cytoplasmic                                      | b.t.     | 1,50E+06 | 2,25E+06 | 1,50E+06 | b.t.     | b.t.     | b.t.     | 1,30E+06 | 1,20E+06 | 4,70E+06 |          |
| Q5T7C4 | High mobility group protein B1                                       | b.t.     | 9,10E+06 | 1,37E+07 | 9,10E+06 | 1,71E+07 | 1,90E+07 | 1,81E+07 | 1,10E+07 | 9,90E+06 | 7,92E+06 |          |
| Q5TB52 | 3'-phosphoadenosine 5'-phosphosulfate synthase 2                     | b.t.     | b.t.     | b.t.     | 2,76E+06 | 2,53E+06 | 2,30E+06 | b.t.     | b.t.     | b.t.     | 2,20E+06 | 1,00E+06 | 3,40E+06 | 2,97E+06 | 3,30E+06 | 3,14E+06 | 7,00E+06 | 6,30E+06 | 2,80E+06 |          |
| Q5TCI8 | Prelamin-A/C                                                         | b.t.     | 9,70E+06 | 1,46E+07 | 9,70E+06 | 2,16E+07 | 2,40E+07 | 2,28E+07 | b.t.     | b.t.     | b.t.     |          |
| Q5TEC6 | Histone H3                                                           | 6,65E+06 | 2,30E+06 | 1,10E+07 | b.t.     | b.t.     | b.t.     | 1,80E+07 | 1,50E+07 | 1,20E+07 | 3,90E+06 | 1,94E+07 | 3,10E+07 | b.t.     | b.t.     | b.t.     | 3,20E+07 | 2,88E+07 | 2,30E+07 |          |
| Q5U077 | L-lactate dehydrogenase                                              | b.t.     | b.t.     | b.t.     | 8,22E+06 | 3,00E+06 | 9,60E+06 | 2,80E+06 | 1,40E+06 | 2,10E+06 | 3,90E+06 | 3,10E+06 | 3,20E+07 | 1,08E+08 | 1,20E+08 | 1,14E+08 | 6,10E+07 | 1,20E+07 | 4,00E+06 |          |
| Q5U0C3 | RAP1A, member of RAS oncogene family                                 | b.t.     | 5,67E+06 | 6,30E+06 | 5,99E+06 | 3,00E+06 | 2,70E+06 | 2,16E+06 |          |
| Q5U8W9 | Protein arginine methyltransferase 1                                 | b.t.     | 1,20E+07 | 1,20E+07 | 9,60E+06 |          |
| Q6FGB3 | PCBD protein                                                         | b.t.     | 4,00E+06 | 3,60E+06 | 2,88E+06 |          |
| Q6FGD7 | TBCA protein                                                         | b.t.     | 2,20E+06 | 3,30E+06 | 2,20E+06 | b.t.     | b.t.     | b.t.     | b.t.     | b.t.     | b.t.     |          |
| Q6FGH9 | DNCL1 protein                                                        | b.t.     | 1,40E+07 | 1,26E+07 | 1,01E+07 |          |
| Q6FHP5 | PHB protein                                                          | b.t.     | b.t.     | b.t.     | 1,35E+06 | 4,50E+05 | 1,60E+06 | 1,07E+06 | 8,88E+05 | 7,10E+05 | 3,70E+06 | 5,55E+06 | 3,70E+06 | 1,44E+07 | 1,60E+07 | 1,52E+07 | 1,60E+07 | 1,44E+07 | 1,15E+07 |          |
| Q6FHU3 | PSME1 protein                                                        | b.t.     | 3,03E+06 | 4,50E+05 | 5,60E+06 | 7,92E+06 | 8,80E+06 | 8,36E+06 | 1,30E+07 | 1,17E+07 | 3,90E+05 |          |
| Q6FHV6 | ENO2 protein                                                         | b.t.     | b.t.     | b.t.     | 6,61E+06 | 7,20E+06 | 4,30E+06 | b.t.     | b.t.     | b.t.     | 6,60E+06 | 9,90E+06 | 6,60E+06 | 6,66E+06 | 7,40E+06 | 7,03E+06 | 2,00E+06 | 1,80E+06 | 1,44E+06 |          |
| Q6FHX6 | FEN1 protein                                                         | b.t.     | 9,90E+06 | 1,10E+07 | 1,05E+07 | b.t.     | b.t.     | b.t.     |          |
| Q6IAX2 | RPL21 protein                                                        | b.t.     | 3,70E+06 | 5,55E+06 | 3,70E+06 | b.t.     | b.t.     | b.t.     | b.t.     | b.t.     | b.t.     |          |
| Q6IAX5 | Eukaryotic translation initiation factor 3 subunit E                 | b.t.     | 2,90E+06 | 3,50E+06 | 2,80E+06 |          |
| Q6IBA2 | PC4 protein                                                          | b.t.     | b.t.     | b.t.     | 1,68E+06 | 1,54E+06 | 1,40E+06 | 1,95E+06 | 1,63E+06 | 1,30E+06 | 7,40E+06 | 1,11E+07 | 7,40E+06 | 1,71E+07 | 1,90E+07 | 1,81E+07 | 1,70E+07 | 1,53E+07 | 1,22E+07 |          |
| Q6IBG5 | MYL6 protein                                                         | b.t.     | 3,50E+06 | 5,25E+06 | 3,50E+06 | 6,39E+06 | 7,10E+06 | 6,75E+06 | 1,40E+07 | 1,26E+07 | 1,01E+07 |          |
| Q6IBH6 | RPL26 protein                                                        | b.t.     | 3,80E+06 | 5,70E+06 | 3,80E+06 | b.t.     | b.t.     | b.t.     | 7,60E+06 | 6,84E+06 | 5,47E+06 |          |
| Q6IBM8 | U5-116KD protein                                                     | b.t.     | b.t.     | b.t.     | 2,30E+06 | 2,30E+06 | 2,99E+06 | b.t.     | 2,20E+06 | 1,98E+06 | 1,58E+06 |          |
| Q6IBN0 | PSMD3 protein                                                        | b.t.     | b.t.     | b.t.     | 7,44E+05 | 6,82E+05 | 6,20E+05 | b.t.     | 2,30E+06 | 5,10E+06 | 5,20E+06 |          |
| Q6IBN1 | HNRPK protein                                                        | 1,70E+06 | 1,70E+06 | 2,55E+06 | 2,16E+07 | 1,98E+07 | 1,80E+07 | 4,85E+06 | 1,10E+06 | 4,30E+06 | 1,00E+06 | 1,70E+07 | 9,30E+06 | 4,05E+07 | 4,50E+07 | 4,28E+07 | 7,90E+07 | 1,40E+06 | 1,30E+06 |          |
| Q6IBQ5 | FUS protein                                                          | b.t.     | 1,17E+07 | 1,30E+07 | 1,24E+07 | b.t.     | b.t.     | b.t.     |          |
| Q6IBR0 | Dolichyl-diphosphooligosaccharide-protein glycosyltransferase subuni | b.t.     | b.t.     | b.t.     | 4,54E+06 | 6,70E+06 | 1,70E+06 | b.t.     | b.t.     | b.t.     | b.t.     | b.t.     | b.t.     | 7,38E+06 | 8,20E+06 | 7,79E+06 | 1,08E+07 | 9,72E+06 | 9,00E+06 |          |
| Q6IBR2 | FARSLA protein                                                       | b.t.     | b.t.     | b.t.     | b.t.     | b.t.     | b.t.     | 2,10E+06 | 1,75E+06 | 1,40E+06 | b.t.     | b.t.     | b.t.     | 5,49E+06 | 6,10E+06 | 5,80E+06 | 3,90E+06 | 3,51E+06 | 2,81E+06 |          |
| Q6IBS5 | DLST protein                                                         | b.t.     | 1,60E+06 | 2,40E+06 | 1,60E+06 | 7,74E+06 | 8,60E+06 | 8,17E+06 | 9,60E+06 | 8,64E+06 | 6,91E+06 |          |
| Q6IBU0 | EIF5 protein                                                         | b.t.     | b.t.     | b.t.     | 2,33E+06 | 2,70E+06 | 1,40E+06 | b.t.     | b.t.     | b.t.     | b.t.     | b.t.     | b.t.     | 1,26E+07 | 1,40E+07 | 1,33E+07 | 7,90E+06 | 7,11E+06 | 5,69E+06 |          |
| Q6ICN0 | GRB2 protein                                                         | b.t.     | 9,90E+06 | 1,10E+07 | 1,05E+07 | b.t.     | b.t.     | b.t.     |          |
| Q6LBS1 | Smb/B' autoimmune antigene                                           | b.t.     | b.t.     | b.t.     | 6,60E+06 | 6,05E+06 | 5,50E+06 | b.t.     | b.t.     | b.t.     | 7,90E+06 | 1,19E+07 | 7,90E+06 | 1,35E+07 | 1,50E+07 | 1,43E+07 | 2,50E+07 | 1,20E+06 | 1,20E+06 |          |
| Q6LET3 | HPRT1 protein                                                        | b.t.     | b.t.     | b.t.     | 6,48E+06 | 5,94E+06 | 5,40E+06 | 2,10E+06 | 1,75E+06 | 1,40E+06 | 2,90E+06 | 4,35E+06 | 2,90E+06 | b.t.     | b.t.     | b.t.     | 1,20E+07 | 1,08E+07 | 8,64E+06 |          |
| Q6NTA2 | HNRNPL protein                                                       | b.t.     | b.t.     | b.t.     | 3,84E+06 | 3,52E+06 | 3,20E+06 | b.t.     | b.t.     | b.t.     | 3,60E+06 | 5,40E+06 | 3,60E+06 | 1,08E+07 | 1,20E+07 | 1,14E+07 | 2,00E+07 | 1,80E+07 | 1,44E+07 |          |
| Q6NVV9 | SNRPA1 protein                                                       | b.t.     | b.t.     | b.t.     | 4,56E+06 | 4,18E+06 | 3,80E+06 | b.t.     | b.t.     | b.t.     | b.t.     | b.t.     | b.t.     | 2,52E+06 | 2,80E+06 | 2,66E+06 | b.t.     | b.t.     | b.t.     |          |
| Q6NWZ1 | CKAP4 protein                                                        | b.t.     | 2,88E+06 | 3,20E+06 | 3,04E+06 | 4,40E+06 | 3,96E+06 | 1,00E+07 |          |
| Q6NXR8 | 40S ribosomal protein S3a                                            | b.t.     | 1,20E+07 | 1,80E+07 | 1,20E+07 | 1,17E+07 | 1,30E+07 | 1,24E+07 | 1,80E+07 | 1,62E+07 | 1,30E+07 |          |
| Q6P2H8 | Transmembrane protein 53 transport domain                            | b.t.     | 6,60E+06 | 5,94E+06 | 4,75E+06 |          |
| Q6P2Q9 | Pre-mRNA-processing-splicing factor 8                                | 3,10E+05 | 4,65E+05 | 3,10E+05 | 4,20E+06 | 4,20E+06 | 5,46E+06 | b.t.     | b.t.     | b.t.     | b.t.     | b.t.     | b.t.     | 3,42E+06 | 3,80E+06 | 3,61E+06 | 6,84E+06 | 6,16E+06 | 5,70E+06 |          |
| Q6PCE3 | Glucose 1,6-bisphosphate synthase                                    | b.t.     | b.t.     | b.t.     | 2,35E+06 | 2,60E+06 | 1,50E+06 | b.t.     | b.t.     | b.t.     | b.t.     | b.t.     | b.t.     | 3,69E+06 | 4,10E+06 | 3,90E+06 | 6,36E+06 | 5,72E+06 | 5,30E+06 |          |
| Q6PIN5 | PA2G4 protein B                                                      | b.t.     | 1,50E+06 | 1,50E+06 | 2,25E+06 | 1,17E+07 | 1,30E+07 | 1,24E+07 | 1,00E+07 | 9,00E+06 | 1,10E+07 |          |
| Q6PIY1 | FUBP1 protein                                                        | b.t.     | 1,70E+07 | 1,53E+07 | 1,22E+07 |          |
| Q6PKA6 | ALDH3A1 protein                                                      | 2,15E+06 | 2,30E+06 | 2,00E+06 | 4,27E+07 | 6,30E+07 | 1,60E+07 | 3,90E+06 | 3,25E+06 | 2,60E+06 | 1,20E+07 | 5,80E+06 | 1,10E+07 | 1,53E+08 | 1,70E+08 | 1,62E+08 | 4,50E+07 | 3,40E+07 | 1,10E+08 |          |
| Q6PKH8 | ANP32A protein                                                       | b.t.     | b.t.     | b.t.     | 6,72E+06 | 6,16E+06 | 5,60E+06 | 2,85E+06 | 2,38E+06 | 1,90E+06 | 4,10E+06 | 6,15E+06 | 4,10E+06 | 4,50E+06 | 5,00E+06 | 4,75E+06 | 2,50E+07 | 2,25E+07 | 1,80E+07 |          |
| Q71RH4 | FP1047                                                               | b.t.     | 2,09E+06 | 2,80E+05 | 3,90E+06 | b.t.     | b.t.     | b.t.     | 6,10E+06 | 5,49E+06 | 1,30E+06 |          |
| Q71U36 | Tubulin alpha-1A                                                     | b.t.     | b.t.     | b.t.     | 2,63E+06 | 2,60E+06 | 1,90E+06 | 4,50E+06 | 3,75E+06 | 3,00E+06 | 7,70E+06 | 4,40E+06 | 1,10E+07 | 5,31E+07 | 5,90E+07 | 5,61E+07 | 1,10E+07 | 1,90E+05 | 1,40E+07 |          |
| Q76LA1 | CSTB protein                                                         | b.t.     | b.t.     | b.t.     | 2,52E+06 | 2,31E+06 | 2,10E+06 | b.t.     | b.t.     | b.t.     | b.t.     | b.t.     | b.t.     | 1,35E+07 | 1,50E+07 | 1,43E+07 | 2,00E+07 | 1,80E+07 | 1,44E+07 |          |
| Q7KZX8 | G1 to S phase transition 1                                           | b.t.     | 4,40E+06 | 1,20E+07 | 8,60E+06 |          |
| Q7Z3X3 | N-acetylglucosamine-6-sulfatase                                      | b.t.     | b.t.     | b.t.     | 4,03E+06 | 4,00E+06 | 2,90E+06 | b.t.     |          |
| Q7Z4X0 | MO25-like protein                                                    | b.t.     | b.t.     | b.t.     | 2,08E+06 | 1,50E+06 | 1,90E+06 | b.t.     | b.t.     | b.t.     | b.t.     | b.t.     | b.t.     | 4,41E+06 | 4,90E+06 | 4,66E+06 | b.t.     | b.t.     | b.t.     |          |
| Q      |                                                                      |          |          |          |          |          |          |          |          |          |          |          |          |          |          |          |          |          |          |          |

|        |                                                               |          |          |          |          |          |          |          |          |          |          |          |          |          |          |          |          |          |          |
|--------|---------------------------------------------------------------|----------|----------|----------|----------|----------|----------|----------|----------|----------|----------|----------|----------|----------|----------|----------|----------|----------|----------|
| Q86S27 | Full-length cDNA clone CS0DJ015YJ12                           | b.t.     | b.t.     | b.t.     | 6,84E+05 | 6,27E+05 | 5,70E+05 | b.t.     | b.t.     | b.t.     | 2,60E+06 | 1,70E+06 | 3,50E+06 | 5,22E+06 | 5,80E+06 | 5,51E+06 | 9,30E+06 | 8,37E+06 | 6,70E+06 |
| Q86UY0 | TXNDC5 protein                                                | b.t.     | b.t.     | b.t.     | 2,70E+06 | 2,60E+06 | 2,00E+06 | b.t.     | b.t.     | b.t.     | 1,40E+06 | 3,10E+06 | 4,70E+06 | 1,98E+07 | 2,20E+07 | 2,09E+07 | 5,90E+06 | 1,10E+07 | 5,70E+06 |
| Q86VG2 | Splicing factor proline/glutamine-rich                        | b.t.     | b.t.     | b.t.     | 2,52E+06 | 2,31E+06 | 2,10E+06 | 2,40E+06 | 2,00E+06 | 1,60E+06 | 1,33E+06 | 1,70E+06 | 9,60E+05 | 4,86E+06 | 5,40E+06 | 5,13E+06 | 7,90E+06 | 7,11E+06 | 5,69E+06 |
| Q86VP6 | Cullin-associated NEDD8-dissociated protein 1                 | b.t.     | b.t.     | b.t.     | 5,45E+06 | 9,80E+06 | 7,90E+05 | b.t.     | b.t.     | b.t.     | b.t.     | b.t.     | b.t.     | 5,85E+06 | 6,50E+06 | 6,18E+06 | 3,70E+06 | 4,10E+06 | 7,00E+06 |
| Q8IW6P | Class IVb beta tubulin                                        | b.t.     | 1,80E+06 | 1,80E+06 | 2,70E+06 | b.t.     | b.t.     | b.t.     | b.t.     | b.t.     | b.t.     |
| Q8IZ29 | Tubulin, beta 2C                                              | b.t.     | b.t.     | b.t.     | 7,80E+05 | 7,15E+05 | 6,50E+05 | b.t.     | b.t.     | b.t.     | 2,20E+06 | 1,10E+06 | 3,30E+06 | 2,88E+07 | 3,20E+07 | 3,04E+07 | 2,88E+06 | 2,59E+06 | 2,40E+06 |
| Q8N163 | Cell cycle and apoptosis regulator protein 2                  | b.t.     | b.t.     | b.t.     | 1,68E+06 | 1,54E+06 | 1,40E+06 | 1,10E+07 | 5,31E+07 | 5,90E+07 | b.t.     | b.t.     | b.t.     | b.t.     | b.t.     | b.t.     | 5,04E+06 | 5,60E+06 | 5,32E+06 |
| Q8NBS9 | Thioredoxin domain-containing protein 5                       | b.t.     | b.t.     | b.t.     | 2,70E+06 | 2,60E+06 | 2,00E+06 | b.t.     | b.t.     | b.t.     | 1,40E+06 | 3,10E+06 | 4,70E+06 | 1,98E+07 | 2,20E+07 | 2,09E+07 | 5,90E+06 | 1,10E+07 | 5,70E+06 |
| Q8NCW5 | NAD(P)H-hydrate epimerase                                     | b.t.     | b.t.     | b.t.     | 5,16E+06 | 4,73E+06 | 4,30E+06 | 2,25E+06 | 1,88E+06 | 1,50E+06 | 6,60E+06 | 9,90E+06 | 6,60E+06 | 1,35E+07 | 1,50E+07 | 1,43E+07 | 1,10E+07 | 9,90E+06 | 7,92E+06 |
| Q8TB01 | Similar to cytoskeleton-associated protein 4                  | b.t.     | 2,88E+06 | 3,20E+06 | 3,04E+06 | 4,40E+06 | 3,96E+06 | 1,00E+07 |
| Q8TC62 | Septin 7                                                      | b.t.     | 9,00E+06 | 1,00E+07 | 9,50E+06 | b.t.     | b.t.     | b.t.     |
| Q8TDN6 | Ribosome biogenesis protein BRX1                              | b.t.     | b.t.     | b.t.     | 1,20E+06 | 1,20E+06 | 1,56E+06 | b.t.     | b.t.     | b.t.     | b.t.     | b.t.     | b.t.     | 6,66E+06 | 7,40E+06 | 7,03E+06 | 7,20E+06 | 6,48E+06 | 5,18E+06 |
| Q8WU16 | COPG protein                                                  | b.t.     | b.t.     | b.t.     | 1,01E+06 | 9,24E+05 | 8,40E+05 | 2,55E+06 | 2,13E+06 | 1,70E+06 | b.t.     | b.t.     | b.t.     | 3,78E+06 | 4,20E+06 | 3,99E+06 | 7,40E+06 | 7,70E+06 | 6,16E+06 |
| Q8WUM4 | Programmed cell death 6-interacting protein                   | b.t.     | 1,30E+06 | 1,17E+06 | 9,36E+05 |
| Q92499 | ATP-dependent RNA helicase DDX1                               | b.t.     | 4,80E+06 | 1,20E+06 | 9,60E+05 |
| Q92616 | eIF-2-alpha kinase activator GCN1                             | b.t.     | 2,90E+06 | 2,61E+06 | 2,09E+06 |
| Q92688 | Acidic leucine-rich nuclear phosphoprotein 32 family member B | b.t.     | 2,70E+06 | 4,05E+06 | 2,70E+06 | 9,90E+06 | 1,10E+07 | 1,05E+07 | 1,60E+07 | 1,44E+07 | 1,15E+07 |
| Q92945 | Far upstream element-binding protein 2                        | b.t.     | 7,90E+05 | 7,90E+05 | 1,19E+06 | 9,00E+06 | 1,00E+07 | 9,50E+06 | 3,60E+06 | 3,24E+06 | 4,30E+06 |
| Q93009 | Ubiquitin carboxyl-terminal hydrolase 7                       | b.t.     | b.t.     | b.t.     | 3,90E+06 | 3,90E+06 | 5,07E+06 | b.t.     | 3,90E+06 | 3,51E+06 | 2,81E+06 |
| Q93079 | Histone H2B type 1-H                                          | b.t.     | 2,80E+06 | 4,20E+06 | 2,80E+06 | 1,08E+07 | 1,20E+07 | 1,14E+07 | b.t.     | b.t.     | b.t.     |
| Q96BA7 | HNRPU protein                                                 | b.t.     | b.t.     | b.t.     | 8,70E+06 | 2,00E+06 | 1,10E+07 | 8,70E+06 | 7,25E+06 | 5,80E+06 | 3,40E+06 | 8,90E+06 | 1,10E+07 | 4,32E+07 | 4,80E+07 | 4,56E+07 | 2,70E+07 | 4,10E+06 | 6,30E+06 |
| Q96BS4 | EBF protein                                                   | b.t.     | 9,90E+06 | 1,10E+07 | 1,05E+07 | 1,20E+07 | 1,08E+07 | 8,64E+06 |
| Q96C19 | FL-hand domain-containing protein D2                          | b.t.     | 3,70E+06 | 5,55E+06 | 3,70E+06 | 8,46E+06 | 9,40E+06 | 8,93E+06 | 8,80E+06 | 7,92E+06 | 6,34E+06 |
| Q96DG6 | Carboxymethylenebutenolidase                                  | b.t.     | b.t.     | b.t.     | 2,76E+06 | 2,53E+06 | 2,30E+06 | b.t.     | b.t.     | b.t.     | b.t.     | b.t.     | b.t.     | 8,01E+06 | 8,90E+06 | 8,46E+06 | 2,37E+07 | 3,20E+07 | 1,10E+07 |
| Q96FW1 | Ubiquitin thiosterease OTUB1                                  | b.t.     | b.t.     | b.t.     | 3,48E+06 | 3,19E+06 | 2,90E+06 | b.t.     | 2,90E+06 | 2,61E+06 | 2,09E+06 |
| Q96H31 | UBC protein                                                   | 1,23E+06 | 7,60E+05 | 1,70E+06 | 2,80E+06 | 6,60E+06 | 2,80E+07 | 1,10E+07 | 9,13E+06 | 7,30E+06 | 3,00E+06 | 2,60E+06 | 5,90E+07 | 1,08E+08 | 1,20E+08 | 1,14E+08 | 1,30E+08 | 4,20E+07 | 1,80E+07 |
| Q96HE7 | ERO1-like protein                                             | 3,50E+06 | 3,50E+06 | 5,25E+06 | 9,30E+06 | 1,30E+07 | 4,00E+06 | b.t.     | b.t.     | b.t.     | 3,10E+06 | 2,90E+06 | 3,30E+06 | 2,16E+07 | 2,40E+07 | 2,28E+07 | 9,20E+06 | 1,60E+07 | 1,70E+07 |
| Q96IR1 | RPS4X protein                                                 | b.t.     | b.t.     | b.t.     | 3,12E+06 | 2,86E+06 | 2,60E+06 | b.t.     | b.t.     | b.t.     | 2,95E+06 | 2,50E+06 | 3,40E+06 | 2,52E+07 | 2,80E+07 | 2,66E+07 | 3,90E+07 | 3,51E+07 | 2,81E+07 |
| Q96KP4 | Cytosolic non-specific dipeptidase                            | b.t.     | b.t.     | b.t.     | 1,87E+06 | 2,40E+06 | 9,50E+05 | b.t.     | b.t.     | b.t.     | 1,35E+06 | 7,00E+05 | 2,00E+06 | 8,82E+06 | 9,80E+06 | 9,31E+06 | 3,10E+06 | 2,79E+06 | 5,90E+06 |
| Q96P70 | Importin-9                                                    | b.t.     | b.t.     | b.t.     | 4,60E+06 | 4,60E+06 | 5,98E+06 | b.t.     | 2,52E+06 | 2,27E+06 | 2,10E+06 |
| Q96QK1 | Vacuolar protein sorting-associated protein 35                | b.t.     | b.t.     | b.t.     | 4,33E+06 | 6,00E+06 | 1,90E+06 | b.t.     | b.t.     | b.t.     | b.t.     | b.t.     | b.t.     | 9,90E+06 | 1,10E+07 | 1,05E+07 | 4,30E+06 | 6,60E+06 | 8,00E+06 |
| Q96QL0 | Ribosomal protein L3                                          | b.t.     | 7,00E+06 | 1,05E+07 | 7,00E+06 | 7,11E+06 | 7,90E+06 | 7,51E+06 | 2,10E+07 | 1,89E+07 | 1,51E+07 |
| Q99460 | 26S proteasome non-ATPase regulatory subunit 1                | b.t.     | b.t.     | b.t.     | 5,50E+06 | 5,50E+06 | 7,15E+06 | b.t.     | 4,60E+06 | 9,30E+06 | 7,00E+06 |
| Q99497 | Protein deglycase DJ-1                                        | 2,00E+06 | 2,00E+06 | 3,00E+06 | 1,87E+06 | 1,50E+06 | 1,60E+06 | b.t.     | b.t.     | b.t.     | 1,10E+07 | 1,65E+07 | 1,10E+07 | 2,07E+07 | 2,30E+07 | 2,19E+07 | 3,90E+07 | 3,51E+07 | 7,60E+05 |
| Q99536 | Synaptic vesicle membrane protein VAT-1 homolog               | 2,20E+06 | 3,30E+06 | 2,20E+06 | b.t.     | 1,00E+07 | 9,00E+06 | 7,20E+06 |
| Q99829 | Copine-1                                                      | b.t.     | 1,40E+06 | 1,26E+06 | 1,30E+06 |
| Q99832 | T-complex protein 1 subunit eta                               | b.t.     | b.t.     | b.t.     | 3,00E+06 | 2,75E+06 | 2,50E+06 | b.t.     | 6,40E+06 | 5,50E+06 | 1,10E+07 |
| Q99873 | Protein arginine N-methyltransferase 1                        | b.t.     | 1,20E+07 | 1,20E+07 | 9,60E+06 |
| Q99877 | Histone H2B type 1-N                                          | b.t.     | 2,80E+06 | 4,20E+06 | 2,80E+06 | 1,08E+07 | 1,20E+07 | 1,14E+07 | b.t.     | b.t.     | b.t.     |
| Q99879 | Histone H2B type 1-M                                          | b.t.     | 2,80E+06 | 4,20E+06 | 2,80E+06 | 1,08E+07 | 1,20E+07 | 1,14E+07 | b.t.     | b.t.     | b.t.     |
| Q99880 | Histone H2B type 1-L                                          | b.t.     | 2,80E+06 | 4,20E+06 | 2,80E+06 | 1,08E+07 | 1,20E+07 | 1,14E+07 | b.t.     | b.t.     | b.t.     |
| Q9BQE3 | Tubulin alpha-1C                                              | b.t.     | b.t.     | b.t.     | 3,33E+06 | 2,60E+06 | 2,90E+06 | 4,50E+06 | 3,75E+06 | 3,00E+06 | 7,70E+06 | 4,40E+06 | 1,10E+07 | 5,31E+07 | 5,90E+07 | 5,61E+07 | 3,40E+07 | 1,90E+05 | 1,40E+07 |
| Q9BQG0 | Myb-binding protein 1A                                        | b.t.     | b.t.     | b.t.     | 1,80E+06 | 1,65E+06 | 1,50E+06 | b.t.     |
| Q9BR63 | FARSB protein                                                 | b.t.     | 6,00E+05 | 6,00E+05 | 9,00E+05 | 6,48E+06 | 7,20E+06 | 6,84E+06 | 2,60E+06 | 2,34E+06 | 4,00E+06 |
| Q9BRA2 | Thioredoxin domain-containing protein 17                      | b.t.     | b.t.     | b.t.     | 5,52E+06 | 5,06E+06 | 4,60E+06 | b.t.     | 1,20E+07 | 1,08E+07 | 8,64E+06 |
| Q9BS26 | Endoplasmic reticulum resident protein 44                     | b.t.     | 6,66E+06 | 7,40E+06 | 7,03E+06 | 2,20E+06 | 9,30E+06 | 4,90E+06 |
| Q9BSQ6 | RPL13A protein                                                | b.t.     | 1,80E+06 | 2,70E+06 | 1,80E+06 | 3,06E+06 | 3,40E+06 | 3,23E+06 | 4,00E+06 | 3,60E+06 | 2,88E+06 |
| Q9BSV4 | SFPQ protein                                                  | b.t.     | b.t.     | b.t.     | 2,52E+06 | 2,31E+06 | 2,10E+06 | 2,40E+06 | 2,00E+06 | 1,60E+06 | 1,33E+06 | 1,70E+06 | 9,60E+05 | 4,86E+06 | 5,40E+06 | 5,13E+06 | 7,90E+06 | 7,11E+06 | 5,69E+06 |
| Q9BT70 | Acidic leucine-rich nuclear phosphoprotein 32 family member E | b.t.     | b.t.     | b.t.     | 5,52E+06 | 4,60E+06 | 4,60E+06 | b.t.     | b.t.     | b.t.     | 4,90E+06 | 7,35E+06 | 4,90E+06 | b.t.     | b.t.     | b.t.     | 9,30E+06 | 1,10E+06 | 8,80E+05 |
| Q9BUF5 | Tubulin beta-6                                                | b.t.     | 1,08E+07 | 1,20E+07 | 1,14E+07 | 2,30E+06 | 2,07E+06 | 1,66E+06 |
| Q9BV28 | TUBB3 protein                                                 | b.t.     | 5,50E+05 | 5,50E+05 | 8,25E+05 | 9,90E+06 | 1,10E+07 | 1,05E+07 | 1,60E+06 | 1,44E+06 | 1,15E+06 |
| Q9BV61 | TRAP1 protein                                                 | b.t.     | b.t.     | b.t.     | 3,60E+06 | 3,20E+06 | 1,70E+07 | 4,15E+06 | 3,10E+06 | 2,60E+06 | 7,00E+06 | 9,80E+06 | 6,10E+06 | 1,62E+07 | 1,80E+07 | 1,71E+07 | 5,80E+07 | 6,80E+06 | 2,60E+07 |
| Q9BVA1 | Tubulin beta-2B                                               | b.t.     | b.t.     | b.t.     | 7,80E+05 | 7,15E+05 | 6,50E+05 | b.t.     | b.t.     | b.t.     | 2,20E+06 | 1,10E+06 | 3,30E+06 | 2,88E+07 | 3,20E+07 | 3,04E+07 | 2,88E+06 | 2,59E+06 | 2,40E+06 |
| Q9BXP5 | Serrate RNA effector molecule homolog                         | b.t.     | b.t.     | b.t.     | 2,57E+06 | 2,20E+06 | 2,10E+06 | b.t.     | b.t.     | b.t.     | b.t.     | b.t.     | b.t.     | 5,67E+06 | 6,30E+06 | 5,99E+06 | 5,76E+06 | 5,18E+06 | 4,80E+06 |
| Q9BYN0 | Sulfiredoxin-1                                                | b.t.     | b.t.     | b.t.     | 6,00E+06 | 6,00E+06 | 7,80E+06 | 2,55E+06 | 2,13E+06 | 1,70E+06 | 8,90E+06 | 1,34E+07 | 8,90E+06 | 2,16E+07 | 2,40E+07 | 2,28E+07 | 1,30E+07 | 1,17E+07 | 9,36E+06 |
| Q9H4A4 | Aminopeptidase B                                              | b.t.     | b.t.     | b.t.     | 5,09E+06 | 5,00E+06 | 3,70E+06 | b.t.     | b.t.     | b.t.     | 1,20E+06 | 1,20E+06 | 1,80E+06 | 1,35E+07 | 1,50E+07 | 1,43E+07 | 4,80E+06 | 1,40E+07 | 1,40E+07 |
| Q9H9T3 | Elongator complex protein 3                                   | b.t.     | 7,50E+06 | 1,13E+07 | 7,50E+06 | 1,62E+07 | 1,80E+07 | 1,71E+07 | 1,50E+07 | 1,35E+07 | 1,20E+06 |
| Q9HAV7 | GrpE protein homolog 1, mitochondrial                         | b.t.     | 5,76E+06 | 6,40E+06 | 6,08E+06 | 7,70E+06 | 6,93E+06 | 5,54E+06 |
| Q9HC38 | Glyoxalase domain-containing protein 4                        | b.t.     | 3,00E+06 | 4,50E+06 | 3,00E+06 | 2,61E+06 | 2,90E+06 | 2,76E+06 | 3,10E+06 | 2,79E+06 | 2,23E+06 |
| Q9HDC9 | Adipocyte plasma membrane-associated protein                  | b.t.     | 7,92E+06 | 8,80E+06 | 8,36E+06 | 1,40E+07 | 1,50E+07 | 9,30E+06 |
| Q9NR30 | Nucleolar RNA helicase 2                                      | b.t.     | 6,21E+06 | 6,90E+06 | 6,56E+06 | 6,50E+06 | 2,50E+07 | 4,40E+06 |
| Q9NR45 | Sialic acid synthase                                          | b.t.     | b.t.     | b.t.     | 5,04E+06 | 4,62E+06 | 4,20E+06 | b.t.     | b.t.     | b.t.     | b.t.     | b.t.     | b.t.     | 8,10E+06 | 9,00E+06 | 8,55E+06 | b.t.     | b.t.     | b.t.     |
| Q9NSD9 | Phenylalanine--tRNA ligase beta subunit                       | b.t.     | 6,00E+05 | 6,00E+05 | 9,00E+05 | 6,48E+06 | 7,20E+06 | 6,84E+06 | 2,60E+06 | 2,34E+06 |
| Q9NSE4 |                                                               |          |          |          |          |          |          |          |          |          |          |          |          |          |          |          |          |          |          |

|        |                                                         |          |          |          |          |          |          |          |          |          |          |          |          |          |          |          |          |          |          |
|--------|---------------------------------------------------------|----------|----------|----------|----------|----------|----------|----------|----------|----------|----------|----------|----------|----------|----------|----------|----------|----------|----------|
| Q9NTK5 | Obg-like ATPase 1b                                      | 6,90E+05 | 1,04E+06 | 6,90E+05 | 7,63E+06 | 7,70E+06 | 5,40E+06 | b.t.     | b.t.     | b.t.     | 1,70E+06 | 1,70E+06 | 2,55E+06 | 1,80E+07 | 2,00E+07 | 1,90E+07 | 5,80E+06 | 5,80E+06 | 7,60E+06 |
| Q9NYU2 | UDP-glucose:glycoprotein glucosyltransferase 1          | b.t.     | 2,50E+06 | 2,25E+06 | 7,20E+05 |
| Q9NZ23 | Drug-sensitive protein 1                                | b.t.     | b.t.     | b.t.     | 6,24E+06 | 5,72E+06 | 5,20E+06 | 1,80E+06 | 1,50E+06 | 1,20E+06 | 9,30E+05 | 9,00E+05 | 9,60E+05 | 8,01E+06 | 8,90E+06 | 8,46E+06 | 4,70E+06 | 4,23E+06 | 9,50E+06 |
| Q9NZM1 | Myoferlin                                               | b.t.     | b.t.     | b.t.     | 1,20E+06 | 1,20E+06 | 1,56E+06 | b.t.     | 1,20E+06 | 1,08E+06 | 5,50E+06 |
| Q9P2J5 | Leucine-tRNA ligase, cytoplasmic                        | b.t.     | 3,70E+06 | 5,55E+06 | 3,70E+06 | 5,04E+06 | 5,60E+06 | 5,32E+06 | 6,12E+06 | 5,51E+06 | 5,10E+06 |
| Q9UBQ7 | Glyoxylate reductase/hydroxypyruvate reductase          | b.t.     | 1,90E+06 | 2,85E+06 | 1,90E+06 | 1,53E+07 | 1,70E+07 | 1,62E+07 | b.t.     | b.t.     | b.t.     |
| Q9UKK9 | ADP-sugar pyrophosphatase                               | b.t.     | 8,90E+05 | 1,34E+06 | 8,90E+05 | 3,60E+06 | 4,00E+06 | 3,80E+06 | b.t.     | b.t.     | b.t.     |
| Q9ULV4 | Coronin-1C                                              | b.t.     | 5,30E+05 | 5,30E+05 | 7,95E+05 | b.t.     | b.t.     | b.t.     | 7,97E+06 | 5,30E+06 | 7,60E+06 |
| Q9UM54 | Pre-mRNA-processing factor 19                           | b.t.     | b.t.     | b.t.     | 1,60E+06 | 1,60E+06 | 2,08E+06 | b.t.     | 5,60E+06 | 5,04E+06 | 4,03E+06 |
| Q9UNM6 | 26S proteasome non-ATPase regulatory subunit 13         | b.t.     | b.t.     | b.t.     | 4,09E+06 | 3,00E+06 | 3,70E+06 | b.t.     | b.t.     | b.t.     | b.t.     | b.t.     | b.t.     | 4,23E+06 | 4,70E+06 | 4,47E+06 | 4,10E+06 | 1,20E+07 | 4,70E+06 |
| Q9UNN8 | Endothelial protein C receptor                          | b.t.     | b.t.     | b.t.     | b.t.     | b.t.     | b.t.     | 1,02E+06 | 8,50E+05 | 6,80E+05 | b.t.     | b.t.     | b.t.     | 6,30E+06 | 7,00E+06 | 6,65E+06 | 6,90E+06 | 6,21E+06 | 4,97E+06 |
| Q9UQM3 | Alpha-tubulin                                           | b.t.     | b.t.     | b.t.     | 1,13E+06 | 1,03E+06 | 9,40E+05 | b.t.     | b.t.     | b.t.     | 2,50E+05 | 2,50E+05 | 3,75E+05 | 2,79E+07 | 3,10E+07 | 2,95E+07 | 4,90E+06 | 4,41E+06 | 1,50E+06 |
| Q9Y265 | RuvB-like 1                                             | b.t.     | b.t.     | b.t.     | 5,04E+06 | 3,50E+06 | 4,70E+06 | b.t.     | b.t.     | b.t.     | 3,20E+06 | 1,70E+06 | 3,60E+06 | 1,53E+07 | 1,70E+07 | 1,62E+07 | 6,20E+06 | 6,50E+06 | 1,70E+07 |
| Q9Y376 | Calcium-binding protein 39                              | b.t.     | b.t.     | b.t.     | 2,08E+06 | 1,50E+06 | 1,90E+06 | b.t.     | b.t.     | b.t.     | b.t.     | b.t.     | b.t.     | 4,41E+06 | 4,90E+06 | 4,66E+06 | b.t.     | b.t.     | b.t.     |
| Q9Y3E8 | CGI-150 protein                                         | b.t.     | 3,00E+06 | 4,50E+06 | 3,00E+06 | 2,61E+06 | 2,90E+06 | 2,76E+06 | 3,10E+06 | 2,79E+06 | 2,23E+06 |
| Q9Y3U8 | 60S ribosomal protein L36                               | b.t.     | 1,44E+07 | 1,60E+07 | 1,52E+07 | b.t.     | b.t.     | b.t.     |
| Q9Y490 | Talin-1                                                 | b.t.     | 9,00E+06 | 1,00E+07 | 9,50E+06 | 3,84E+06 | 3,46E+06 | 3,20E+06 |
| Q9Y4L1 | Hypoxia up-regulated protein 1                          | b.t.     | 2,70E+06 | 2,43E+06 | 3,40E+06 |
| Q9Y5B9 | FACT complex subunit SPT16                              | b.t.     | b.t.     | b.t.     | 2,20E+06 | 2,20E+06 | 2,86E+06 | b.t.     | 4,78E+06 | 3,40E+06 | 4,40E+06 |
| Q9Y678 | Coatome subunit gamma-1                                 | b.t.     | b.t.     | b.t.     | 1,01E+06 | 9,24E+05 | 8,40E+05 | 2,55E+06 | 2,13E+06 | 1,70E+06 | b.t.     | b.t.     | b.t.     | 3,78E+06 | 4,20E+06 | 3,99E+06 | 7,40E+06 | 7,70E+06 | 6,16E+06 |
| Q9Y6E2 | Basic leucine zipper and W2 domain-containing protein 2 | b.t.     | 7,20E+06 | 8,00E+06 | 7,60E+06 | 2,90E+06 | 2,61E+06 | 5,20E+06 |
| Q9Y6E3 | HSPC027                                                 | b.t.     | b.t.     | b.t.     | 4,09E+06 | 3,00E+06 | 3,70E+06 | b.t.     | b.t.     | b.t.     | b.t.     | b.t.     | b.t.     | 4,23E+06 | 4,70E+06 | 4,47E+06 | 4,10E+06 | 1,20E+07 | 4,70E+06 |
| R4GMR5 | 26S proteasome non-ATPase regulatory subunit 8          | b.t.     | b.t.     | b.t.     | 9,96E+05 | 9,13E+05 | 8,30E+05 | b.t.     | b.t.     | b.t.     | b.t.     | b.t.     | b.t.     | 6,66E+06 | 7,40E+06 | 7,03E+06 | 6,20E+06 | 5,58E+06 | 4,46E+06 |
| R4GNA8 | P55 protein                                             | b.t.     | b.t.     | b.t.     | 2,20E+06 | 2,20E+06 | 2,86E+06 | b.t.     | 4,78E+06 | 3,40E+06 | 4,40E+06 |
| R4SBI6 | EPHX1                                                   | 1,04E+06 | 8,80E+05 | 1,20E+06 | 1,63E+07 | 2,20E+07 | 7,60E+06 | b.t.     | b.t.     | b.t.     | 3,00E+06 | 2,10E+06 | 3,90E+06 | 1,89E+07 | 2,10E+07 | 2,00E+07 | 9,40E+06 | 3,00E+07 | 2,10E+07 |
| S4R435 | Protein RPS10-NUDT3                                     | b.t.     | b.t.     | b.t.     | 9,48E+06 | 8,69E+06 | 7,90E+06 | 8,25E+06 | 6,88E+06 | 5,50E+06 | 1,20E+06 | 1,80E+06 | 2,40E+06 | 4,50E+06 | 5,00E+06 | 4,75E+06 | 7,90E+07 | 7,11E+07 | 5,69E+07 |
| V9HW26 | ATP synthase subunit alpha                              | b.t.     | b.t.     | b.t.     | 3,25E+06 | 3,70E+06 | 2,00E+06 | b.t.     | b.t.     | b.t.     | 3,25E+06 | 1,90E+06 | 4,60E+06 | 2,16E+07 | 2,40E+07 | 2,28E+07 | 1,00E+07 | 1,40E+07 | 1,80E+07 |
| V9HW31 | ATP synthase subunit beta                               | b.t.     | b.t.     | b.t.     | 3,24E+06 | 2,97E+06 | 2,70E+06 | b.t.     | b.t.     | b.t.     | 6,20E+06 | 3,80E+06 | 8,60E+06 | 2,61E+07 | 2,90E+07 | 2,76E+07 | 2,20E+07 | 1,80E+07 | 2,70E+07 |
| V9HW62 | Lactoylglutathione lyase                                | b.t.     | 1,80E+06 | 2,70E+06 | 1,80E+06 | 2,43E+06 | 2,70E+06 | 2,57E+06 | 7,30E+06 | 6,57E+06 | 5,26E+06 |
| V9HWB8 | Pyruvate kinase                                         | b.t.     | b.t.     | b.t.     | 7,47E+06 | 5,00E+06 | 7,10E+06 | 6,60E+06 | 5,50E+06 | 4,40E+06 | 2,00E+06 | 2,00E+06 | 3,00E+06 | 2,16E+07 | 2,40E+07 | 2,28E+07 | 9,80E+06 | 3,50E+06 | 1,40E+07 |
| V9HWC9 | Superoxide dismutase [Cu-Zn]                            | b.t.     | 1,80E+07 | 2,00E+07 | 1,90E+07 | 1,30E+07 | 1,17E+07 | 9,36E+06 |
| V9HWH2 | Creatine kinase brain isoform 1                         | b.t.     | 1,80E+06 | 2,70E+06 | 1,80E+06 | 7,92E+06 | 8,80E+06 | 8,36E+06 | 2,40E+06 | 2,16E+06 | 5,20E+06 |
| V9HWI3 | Cathepsin D                                             | b.t.     | b.t.     | b.t.     | 3,74E+06 | 4,40E+06 | 2,20E+06 | 1,29E+06 | 1,08E+06 | 8,60E+05 | b.t.     | b.t.     | b.t.     | 1,08E+07 | 1,20E+07 | 1,14E+07 | 2,80E+07 | 2,52E+07 | 1,20E+06 |
| V9HWJ1 | Glutathione synthetase                                  | b.t.     | b.t.     | b.t.     | 8,88E+06 | 1,30E+07 | 3,40E+06 | b.t.     | b.t.     | b.t.     | 1,91E+06 | 8,20E+05 | 3,00E+06 | 7,92E+06 | 8,80E+06 | 8,36E+06 | 5,70E+06 | 9,20E+06 | 9,10E+06 |
| V9HWJ2 | Isocitrate dehydrogenase [NADP]                         | 2,60E+06 | 2,60E+06 | 3,90E+06 | 2,36E+07 | 2,20E+07 | 1,80E+07 | 3,30E+06 | 2,75E+06 | 2,20E+06 | 8,30E+06 | 6,30E+06 | 8,20E+06 | 5,58E+07 | 6,20E+07 | 5,89E+07 | 2,00E+07 | 2,00E+07 | 3,50E+07 |
| X5D2T3 | Ribosomal protein L10 isoform A                         | b.t.     | 5,10E+06 | 7,65E+06 | 5,10E+06 | 4,68E+06 | 5,20E+06 | 4,94E+06 | 6,10E+06 | 5,49E+06 | 4,39E+06 |
| X5D7E3 | Eukaryotic translation initiation factor 4E isoform A   | b.t.     | 4,23E+06 | 4,70E+06 | 4,47E+06 | 1,20E+07 | 1,08E+07 | 8,64E+06 |
| X5DR03 | Glutathione S-transferase isoform B                     | b.t.     | 1,30E+07 | 1,17E+07 | 9,36E+06 |
| X6RA14 | S-formylglutathione hydrolase                           | b.t.     | 1,08E+07 | 1,20E+07 | 1,14E+07 | 3,60E+06 | 3,24E+06 | 2,59E+06 |
