# Supplementary material for: The Effect of Cannabidiol on UV-Induced Changes in Intracellular Signaling of 3D-Cultured Skin Keratinocytes
Source: MDPI journal article supplement (doi:10.3390/ijms22031501), 2021-02-02

### Supplementary Figure S1

SDS-PAGE separation and staining with Coomassie Brilliant Blue R-250 of proteins from control keratinocytes and irradiated with UVA (30 J/cm<sup>2</sup>), UVB (60 mJ/cm<sup>2</sup>) or/and treated with cannabidiol (CBD, 4 µM) in a three-dimensional (3D) culture model.

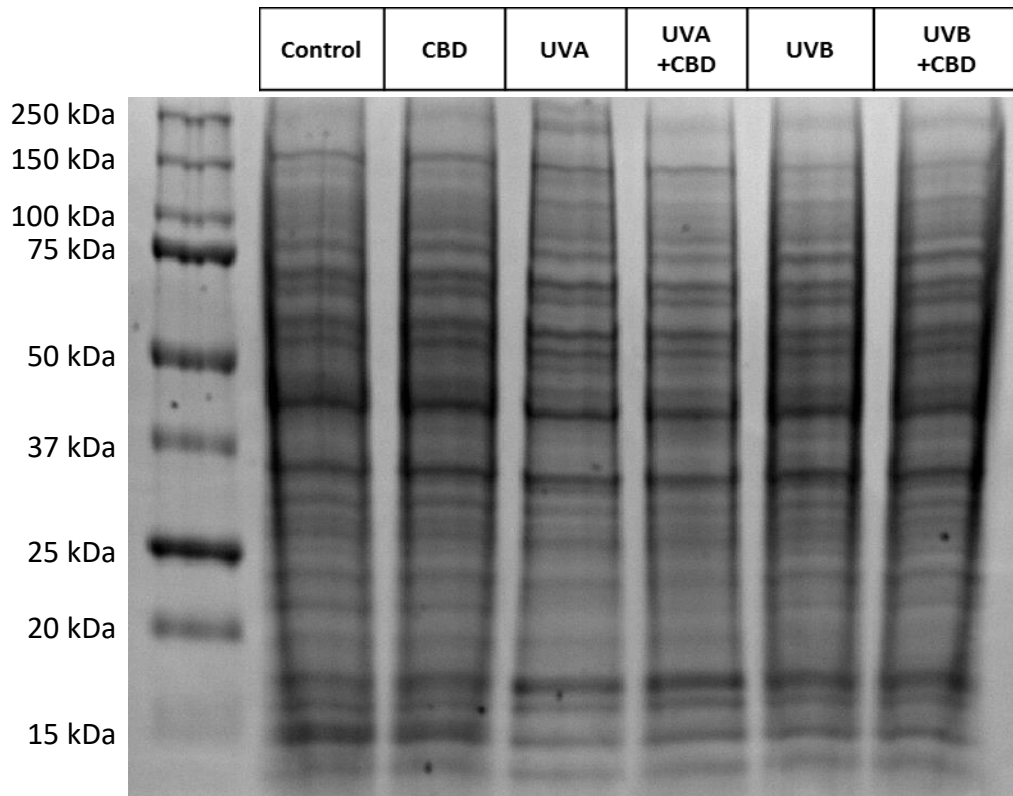

Supplement: s1 [file s1]
